# Supplementary material for: Harnessing the chemistry of 4aH-carbazoles: a consecutive rearrangements approach to carbazoles
Source: Royal Society of Chemistry journal article supplement (doi:10.1039/d1qo01053k), 2021-01-01

### **Materials and methods.**

Unless stated otherwise, reactions were conducted in dry glassware using anhydrous solvents (passed through activated alumina columns). All commercially available reagents were used as received unless otherwise specified. Reaction temperatures were controlled using an IKA mag temperature modulator, and unless stated otherwise, reactions were performed at room temperature (RT, approximately 23 °C). Thin layer chromatography (TLC) was conducted on plates (GF254) supplied by Yantai Chemicals (China) and visualized using a combination of UV, anisaldehyde, iodine, and potassium permanganate staining. Silica gel (200-300 mesh) supplied by Tsingtao Haiyang Chemicals (China) was used for flash column chromatography. <sup>1</sup>H NMR spectra were recorded on Bruker spectrometers (at 400 MHz) and are reported relative to deuterated solvent signals. Data for <sup>1</sup>H NMR spectra are reported as follows: chemical shift (δ ppm), multiplicity, coupling constant (Hz) and integration. <sup>13</sup>C NMR spectra are reported in terms of chemical shift. High resolution mass spectra were obtained from the Tsinghua University Mass Spectrometry Facility.

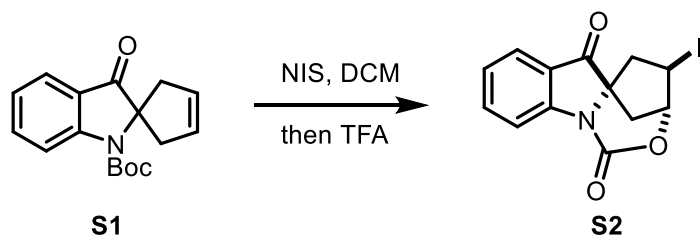

To a solution of **S1** (3.1 g, 10.88 mmol) in dichloromethane (108.0 mL) at RT was added *N*-Iodosuccinimide (4.9 g, 21.76 mmol). The mixture was stirred for 30 min, and then trifluoroacetic acid (10.8 mL) was added. The reaction was stirred for 3 h at RT. The reaction was quenched with saturated sodium carbonate solution and saturated sodium sulfite solution, and extracted with dichloromethane (3×100 mL). The combined organic layers were dried over anhydrous sodium sulfate, and concentrated under reduced pressure. The crude residue was purified by silica gel chromatography, eluting with ethyl acetate/petroleum ether = 1/4 to afford the desired product **S2** (3.67 g, 95% yield) as a white solid.

<sup>1</sup>H NMR (400 MHz, Chloroform-*d*)  $\delta$  8.22 (d,  $J = 8.3$  Hz, 1H), 7.81 (dd,  $J = 7.7, 1.3$  Hz, 1H), 7.75 (ddd,  $J = 8.5, 7.3, 1.4$  Hz, 1H), 7.28 (t,  $J = 7.6$  Hz, 1H), 5.20 (t,  $J = 1.7$  Hz, 1H), 4.56 (ddd,  $J = 7.7, 4.7, 2.3$  Hz, 1H), 3.00 (dd,  $J = 13.0, 2.5$  Hz, 1H), 2.91 (ddd,  $J = 15.2, 8.1, 2.3$  Hz, 1H), 2.74 (dd,  $J = 15.2, 4.8$  Hz, 1H), 2.19 – 2.08 (m, 1H).

<sup>13</sup>C NMR (100 MHz, Chloroform-*d*)  $\delta$  194.5, 150.5, 147.0, 138.1, 124.7, 124.4, 123.0, 117.1, 88.3, 73.2, 49.4, 33.6, 18.2.

HRMS-ESI ( $m/z$ ): calcd for C<sub>13</sub>H<sub>11</sub>INO<sub>3</sub> [M+H]<sup>+</sup>: 355.9784; found: 355.9785.

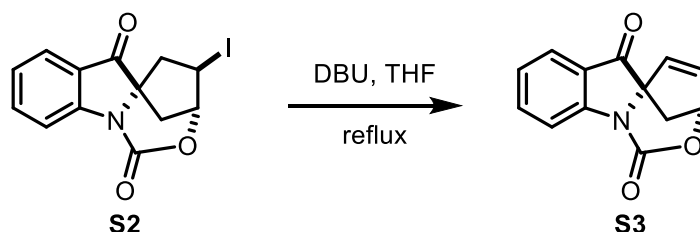

To a solution of **S2** (3.67 g, 10.34 mmol) in THF (130 mL) at RT was added 1,8-Diazabicyclo [5.4.0] undec-7-ene (10.8 mL, 72 mmol). The reaction was stirred for 3 h at reflux and then cooled to RT. The reaction was quenched with saturated ammonium chloride solution and extracted with ethyl acetate (3×100 mL). The combined organic layers were dried over anhydrous sodium sulfate, and concentrated under reduced pressure. The crude residue was purified by silica gel chromatography, eluting with ethyl acetate/petroleum ether = 1/3 to afford the desired product **S3** (1.3 g, 55% yield) as a white solid.

<sup>1</sup>H NMR (400 MHz, Chloroform-*d*)  $\delta$  8.17 (dd,  $J = 8.4, 0.8$  Hz, 1H), 7.79 (dt,  $J = 7.7, 1.0$  Hz, 1H), 7.71 (ddd,  $J = 8.5, 7.3, 1.4$  Hz, 1H), 7.38 – 7.08 (m, 1H), 6.64 (dd,  $J = 5.5, 2.5$  Hz, 1H), 6.39 (dt,  $J = 5.5, 0.9$  Hz, 1H), 5.47 – 5.46 (m, 1H), 2.60 (dd,  $J = 11.4, 2.5$  Hz, 1H), 2.13 (dd,  $J = 11.4, 1.1$  Hz, 1H).

<sup>13</sup>C NMR (100 MHz, Chloroform-*d*)  $\delta$  196.2, 151.0, 147.5, 138.4, 138.1, 136.5, 124.3, 124.2, 122.7, 117.1, 82.5, 73.5, 43.1.

HRMS-ESI ( $m/z$ ): calcd for C<sub>13</sub>H<sub>10</sub>NO<sub>3</sub> [M+H]<sup>+</sup>: 228.0661; found: 228.0657.

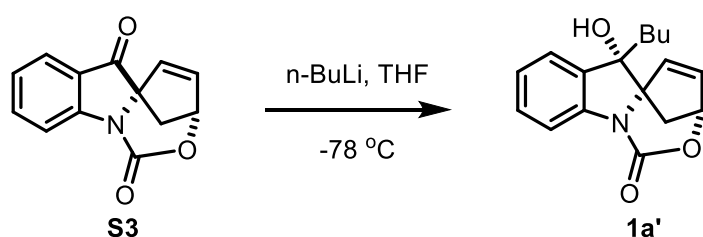

To a solution of **S3** (900 mg, 3.96 mmol) in THF (20.0 mL) at  $-78\text{ }^\circ\text{C}$  was added n-BuLi (3.72 mL, 5.95 mmol, 1.6 M in hexanes). The reaction was stirred at  $-78\text{ }^\circ\text{C}$  for 2 h. The reaction was quenched with saturated ammonium chloride solution and extracted with ethyl acetate (3×40 mL). The combined organic layers were dried over anhydrous sodium sulfate, and concentrated under reduced pressure. The crude residue was purified by silica gel chromatography, eluting with ethyl acetate/petroleum ether = 1/3 to afford the desired product **1a'** as the major epimer (661 mg, 59% combined yield, dr = 4:1).

The major (colorless oil):  $^1\text{H NMR}$  (400 MHz, Chloroform-*d*)  $\delta$  7.84 (d,  $J = 8.0$  Hz, 1H), 7.35 (dd,  $J = 7.6, 1.2$  Hz, 1H), 7.30 (td,  $J = 7.8, 1.3$  Hz, 1H), 7.10 (td,  $J = 7.5, 1.0$  Hz, 1H), 6.72 (d,  $J = 5.6$  Hz, 1H), 6.32 (dd,  $J = 5.7, 2.6$  Hz, 1H), 5.32 – 5.30 (m, 1H), 2.46 (s, 1H), 2.34 (dd,  $J = 11.2, 2.7$  Hz, 1H), 2.25 (d,  $J = 11.1$  Hz, 1H), 1.86 – 1.71 (m, 2H), 1.47 – 1.22 (m, 4H), 0.87 (t,  $J = 7.1$  Hz, 3H).

$^{13}\text{C NMR}$  (100 MHz, Chloroform-*d*)  $\delta$  148.9, 141.0, 139.6, 132.6, 132.6, 129.8, 124.0, 123.6, 115.3, 81.3, 80.5, 78.9, 39.5, 39.0, 24.9, 23.0, 14.0.

HRMS-ESI ( $m/z$ ): calcd for  $\text{C}_{17}\text{H}_{20}\text{NO}_3$   $[\text{M}+\text{H}]^+$ : 286.1443; found: 286.1443.

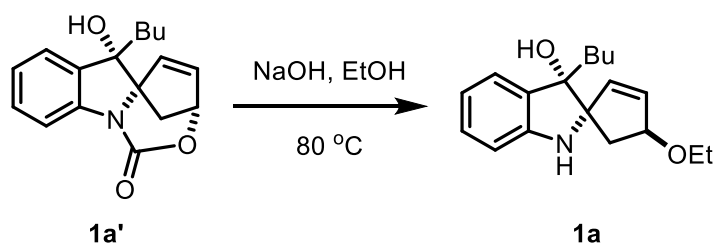

To a solution of **1a'** (350 mg, 1.23 mmol) in EtOH (13 mL) at RT was added sodium hydroxide (492 mg, 12.3 mmol). The reaction was stirred for 3 h at  $80\text{ }^\circ\text{C}$  and then cooled to RT. The reaction was quenched with saturated ammonium chloride solution and extracted with ethyl acetate (3×26 mL). The combined organic layers were dried over anhydrous sodium sulfate, and concentrated under reduced pressure. The crude residue was purified by silica gel chromatography, eluting with ethyl acetate/petroleum ether = 1/3 to afford the desired product **1a** (212 mg, 60% yield) as a brown oil.

$^1\text{H NMR}$  (400 MHz, Methanol-*d*<sub>4</sub>)  $\delta$  7.18 (dd,  $J = 7.4, 1.2$  Hz, 1H), 7.03 (td,  $J = 7.6, 1.3$  Hz, 1H), 6.69 (td,  $J = 7.4, 1.0$  Hz, 1H), 6.59 (d,  $J = 7.8$  Hz, 1H), 6.01 (dd,  $J = 5.7, 2.1$  Hz, 1H), 5.91 (dd,  $J = 5.7, 1.2$  Hz, 1H), 4.68 – 4.66 (m, 1H), 3.60 – 3.52 (m, 2H), 2.50 (dd,  $J = 14.3, 4.0$  Hz, 1H), 2.06 (dd,  $J = 14.3, 6.9$  Hz, 1H), 1.92 – 1.84 (m, 1H), 1.70 – 1.40 (m, 3H), 1.35 – 1.23 (m, 2H), 1.19 (t,  $J = 7.0$  Hz, 3H), 0.90 (t,  $J = 7.3$  Hz, 3H).

$^{13}\text{C NMR}$  (100 MHz, Methanol-*d*<sub>4</sub>)  $\delta$  149.2, 136.6, 133.5, 133.2, 128.3, 123.7, 118.1,

109.8, 82.7, 82.7, 81.0, 64.1, 38.1, 36.2, 25.2, 23.2, 14.4, 13.0.

**HRMS-ESI** ( $m/z$ ): calcd for  $C_{18}H_{26}NO_2$   $[M+H]^+$ : 288.1964; found: 288.1958.

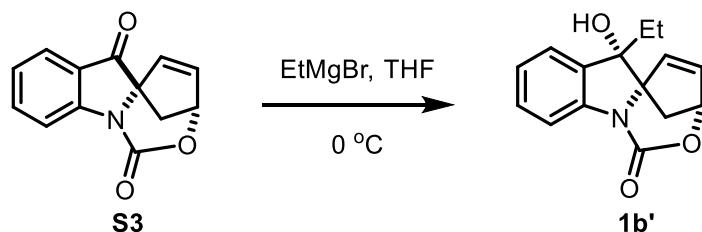

To a solution of **S2** (300 mg, 1.33 mmol) in THF (13.0 mL) at 0 °C was added EtMgBr (2.66 mL, 2.66 mmol, 1 M in THF). The reaction was stirred at 0 °C for 2 h. The reaction was quenched with saturated ammonium chloride solution and extracted with ethyl acetate (3×25 mL). The combined organic layers were dried over anhydrous sodium sulfate, and concentrated under reduced pressure. The crude residue was purified by silica gel chromatography, eluting with ethyl acetate/petroleum ether = 1/2 to afford the desired product **1b'** as the major epimer (198 mg, 58% combined yield, dr = 4.5:1).

The major (colorless oil): **<sup>1</sup>H NMR** (400 MHz, Chloroform-*d*)  $\delta$  7.79 (d,  $J$  = 8.1 Hz, 1H), 7.35 (dd,  $J$  = 7.5, 1.3 Hz, 1H), 7.30 – 7.23 (m, 1H), 7.07 (t,  $J$  = 7.5 Hz, 1H), 6.73 (d,  $J$  = 5.7 Hz, 1H), 6.27 (dd,  $J$  = 5.7, 2.5 Hz, 1H), 5.28 – 5.27 (m, 1H), 3.04 (s, 1H), 2.33 (dd,  $J$  = 11.2, 2.7 Hz, 1H), 2.20 (d,  $J$  = 11.2 Hz, 1H), 1.90 (dq,  $J$  = 14.6, 7.3 Hz, 1H), 1.75 (dq,  $J$  = 14.5, 7.4 Hz, 1H), 0.97 (t,  $J$  = 7.4 Hz, 3H).

**<sup>13</sup>C NMR** (100 MHz, Chloroform-*d*)  $\delta$  148.9, 141.2, 139.5, 132.4, 132.3, 129.6, 124.1, 123.5, 115.1, 81.4, 80.4, 78.9, 39.3, 31.9, 7.3.

**HRMS-ESI** ( $m/z$ ): calcd for  $C_{15}H_{16}NO_3$   $[M+H]^+$ : 258.1130; found: 258.1129.

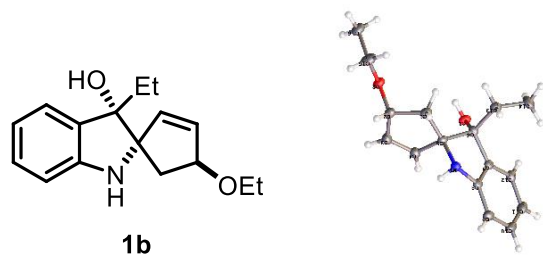

The above compound was prepared by following the same procedure as that for **1a**. Purification by silica gel chromatography, eluting with ethyl acetate/petroleum ether = 1/3 to afford the desired product **1b** (58% yield) as a white solid. The relative stereochemistry of **1b** was confirmed by X-ray analysis.

**<sup>1</sup>H NMR** (400 MHz, Chloroform-*d*)  $\delta$  7.25 – 7.21 (m, 1H), 7.09 (td,  $J$  = 7.6, 1.3 Hz, 1H), 6.81 (td,  $J$  = 7.4, 0.9 Hz, 1H), 6.60 (dd,  $J$  = 7.7, 0.8 Hz, 1H), 6.07 (d,  $J$  = 5.6 Hz, 1H), 6.03 (dd,  $J$  = 5.7, 2.1 Hz, 1H), 4.58 – 4.55 (m, 1H), 3.63 (s, 1H), 3.61 – 3.51 (m, 2H), 2.37 (s, 1H), 2.30 (dd,  $J$  = 13.9, 3.2 Hz, 1H), 2.13 (dd,  $J$  = 13.9, 5.9 Hz, 1H), 1.91 – 1.71 (m, 2H), 1.23 (t,  $J$  = 7.0 Hz, 3H), 0.91 (t,  $J$  = 7.4 Hz, 3H).

**<sup>13</sup>C NMR** (100 MHz, Chloroform-*d*)  $\delta$  148.2, 139.1, 133.0, 132.3, 128.5, 124.6, 119.2, 110.1, 83.3, 82.2, 81.9, 64.3, 37.6, 30.8, 15.6, 7.8.

**HRMS-ESI** ( $m/z$ ): calcd for  $C_{16}H_{22}NO_2$   $[M+H]^+$ : 260.1651; found: 260.1630.

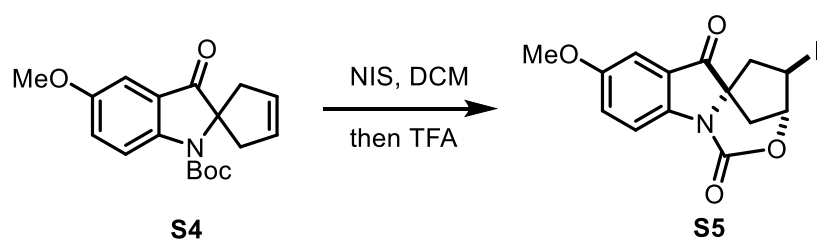

The above compound was prepared by following the same procedure as that for **S2**. Purification by silica gel chromatography, eluting with ethyl acetate/petroleum ether = 1/4 to afford the desired product **S5** (91% yield) as a white solid.

<sup>1</sup>H NMR (400 MHz, Chloroform-*d*)  $\delta$  8.07 (dd,  $J = 9.2, 2.5$  Hz, 1H), 7.34 – 7.25 (m, 1H), 7.17 (d,  $J = 2.6$  Hz, 1H), 5.16 (s, 1H), 4.58 – 4.48 (m, 1H), 3.81 (s, 3H), 2.99 – 2.83 (m, 2H), 2.70 (dt,  $J = 15.3, 3.5$  Hz, 1H), 2.09 (d,  $J = 12.9$  Hz, 1H).

<sup>13</sup>C NMR (100 MHz, Chloroform-*d*)  $\delta$  194.3, 157.0, 146.9, 145.1, 127.2, 123.7, 118.1, 104.8, 88.2, 73.6, 55.8, 49.3, 33.6, 18.3.

HRMS-ESI ( $m/z$ ): calcd for C<sub>14</sub>H<sub>13</sub>INO<sub>4</sub> [M+H]<sup>+</sup>: 385.9889; found: 385.9896.

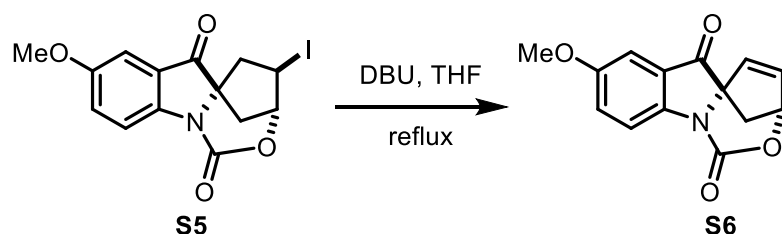

The above compound was prepared by following the same procedure as that for **S3**. Purification by silica gel chromatography, eluting with ethyl acetate/petroleum ether = 1/3 to afford the desired product **S6** (48% yield) as a brown solid.

<sup>1</sup>H NMR (400 MHz, Chloroform-*d*)  $\delta$  8.05 (d,  $J = 9.0$  Hz, 1H), 7.32 – 7.25 (m, 1H), 7.16 (d,  $J = 2.7$  Hz, 1H), 6.61 (dd,  $J = 5.5, 2.5$  Hz, 1H), 6.37 (dt,  $J = 5.5, 0.8$  Hz, 1H), 5.47 – 5.42 (m, 1H), 3.80 (s, 3H), 2.57 (dd,  $J = 11.3, 2.5$  Hz, 1H), 2.10 (dd,  $J = 11.3, 1.1$  Hz, 1H).

<sup>13</sup>C NMR (100 MHz, Chloroform-*d*)  $\delta$  196.1, 156.7, 147.5, 145.8, 138.3, 136.3, 127.1, 123.4, 118.2, 104.7, 82.4, 73.8, 55.7, 43.2.

HRMS-ESI ( $m/z$ ): calcd for C<sub>14</sub>H<sub>12</sub>NO<sub>4</sub> [M+H]<sup>+</sup>: 258.0766; found: 258.0761.

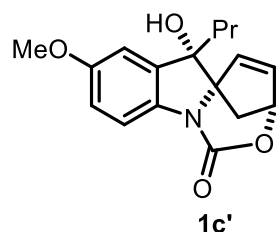

The above compound was prepared by following the same procedure as that for **1b'**. Purification by silica gel chromatography, eluting with ethyl acetate/petroleum ether = 1/2 to afford the desired product **1c'** as the major epimer (53% combined yield, dr = 6:1).

The major(colorless oil):  $^1\text{H NMR}$  (400 MHz, Chloroform-*d*)  $\delta$  7.72 (d,  $J = 8.8$  Hz, 1H), 6.90 (d,  $J = 2.6$  Hz, 1H), 6.80 (dd,  $J = 8.7, 2.6$  Hz, 1H), 6.72 (dd,  $J = 5.7, 1.0$  Hz, 1H), 6.29 (dd,  $J = 5.7, 2.6$  Hz, 1H), 5.29 – 5.28 (m, 1H), 3.79 (s, 3H), 2.80 (s, 1H), 2.31 (dd,  $J = 11.2, 2.7$  Hz, 1H), 2.23 (d,  $J = 11.1$  Hz, 1H), 1.84 – 1.66 (m, 2H), 1.54 – 1.34 (m, 2H), 0.89 (t,  $J = 7.3$  Hz, 3H).

$^{13}\text{C NMR}$  (100 MHz, Chloroform-*d*)  $\delta$  156.3, 148.8, 141.1, 134.1, 133.1, 132.5, 115.8, 114.3, 110.2, 81.2, 80.6, 78.8, 55.7, 41.4, 39.4, 16.2, 14.3.

**HRMS-ESI** ( $m/z$ ): calcd for  $\text{C}_{17}\text{H}_{20}\text{NO}_4$   $[\text{M}+\text{H}]^+$ : 302.1392; found: 302.1389.

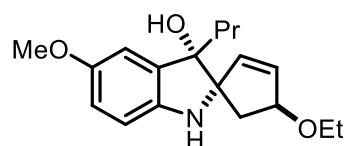

**1c**

The above compound was prepared by following the same procedure as that for **1a**. Purification by silica gel chromatography, eluting with ethyl acetate/petroleum ether = 1/3 to afford the desired product **1c** (72% yield) as a yellow oil.

$^1\text{H NMR}$  (400 MHz, Chloroform-*d*)  $\delta$  6.84 (d,  $J = 2.6$  Hz, 1H), 6.67 (dd,  $J = 8.4, 2.6$  Hz, 1H), 6.54 (d,  $J = 8.4$  Hz, 1H), 6.08 – 5.98 (m, 2H), 4.56 – 4.53 (m, 1H), 3.76 (s, 3H), 3.60 – 3.53 (m, 2H), 2.52 (s, 1H), 2.29 (dd,  $J = 14.0, 3.1$  Hz, 1H), 2.11 (dd,  $J = 14.0, 5.8$  Hz, 1H), 1.79 (ddd,  $J = 13.5, 11.8, 5.1$  Hz, 1H), 1.65 (ddd,  $J = 13.5, 11.7, 4.5$  Hz, 1H), 1.49 – 1.27 (m, 2H), 1.23 (t,  $J = 7.0$  Hz, 3H), 0.86 (t,  $J = 7.3$  Hz, 3H).

$^{13}\text{C NMR}$  (100 MHz, Chloroform-*d*)  $\delta$  153.7, 141.7, 139.3, 134.1, 132.9, 114.1, 110.9, 110.5, 83.8, 82.1, 81.8, 64.3, 55.9, 40.6, 37.6, 16.6, 15.6, 14.5.

**HRMS-ESI** ( $m/z$ ): calcd for  $\text{C}_{18}\text{H}_{26}\text{NO}_3$   $[\text{M}+\text{H}]^+$ : 304.1913; found: 304.1911.

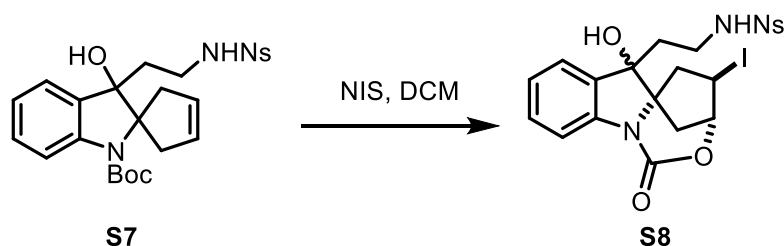

**S7**

**S8**

To a solution of **S7** (515 mg, 1 mmol) in dichloromethane (10.0 mL) at RT was added *N*-Iodosuccinimide (450 mg, 2.0 mmol). The reaction was stirred for 4 h at RT. The reaction was quenched with saturated sodium carbonate solution and saturated sodium sulfite solution, and extracted with dichloromethane (3×20 mL). The combined organic layers were dried over anhydrous sodium sulfate, and concentrated under reduced pressure. The crude residue was purified by silica gel chromatography, eluting with ethyl acetate/petroleum ether = 1/2 to afford the desired product **S8** as a mixture of two epimers (497 mg, 85% combined yield, dr = 3:1).

The mixture (yellow solid):  $^1\text{H NMR}$  (400 MHz, Chloroform-*d*)  $\delta$  8.24 – 8.16 (m, 0.35H), 8.05 (dd,  $J = 7.3, 2.0$  Hz, 1.03H), 7.94 – 7.83 (m, 1.43H), 7.83 – 7.69 (m,

4.20H), 7.32 (d,  $J=7.3$  Hz, 0.80H), 7.25 – 7.22 (m, 0.80H), 7.11 (t,  $J=7.6$  Hz, 0.36H), 6.98 (d,  $J=7.5$  Hz, 1.04H), 6.88 (t,  $J=7.5$  Hz, 1.02H), 6.44 – 6.32 (m, 1.35H), 5.04 (s, 1.02H), 4.90 (s, 0.34H), 4.52 – 4.37 (m, 1.39H), 3.81 (s, 0.91H), 3.59 – 3.44 (m, 0.87H), 3.36 (s, 0.38H), 3.31 – 3.14 (m, 2.13H), 2.82 – 2.74 (m, 1.06H), 2.71 (d,  $J=6.8$  Hz, 2.06H), 2.67 – 2.55 (m, 0.93H), 2.52 – 2.34 (m, 1.23H), 2.27 – 2.13 (m, 2.13H), 2.10 – 2.00 (m, 0.30H), 1.86 – 1.77 (m, 1.13H).

$^{13}\text{C}$  NMR (100 MHz, Chloroform- $d$ )  $\delta$  148.4, 148.3, 148.0, 148.0, 138.8, 138.0, 133.8, 133.7, 133.2, 133.1, 133.0, 133.0, 132.9, 131.6, 131.2, 131.1, 130.9, 130.2, 125.5, 125.4, 124.5, 123.9, 123.6, 122.9, 116.2, 115.9, 86.4, 85.7, 79.9, 79.7, 79.2, 77.9, 48.9, 46.9, 39.4, 39.0, 36.5, 34.5, 32.0, 30.7, 20.1, 18.8.

HRMS-ESI ( $m/z$ ): calcd for  $\text{C}_{21}\text{H}_{21}\text{N}_3\text{O}_7\text{S}$   $[\text{M}+\text{H}]^+$ : 586.0145; found: 586.0145.

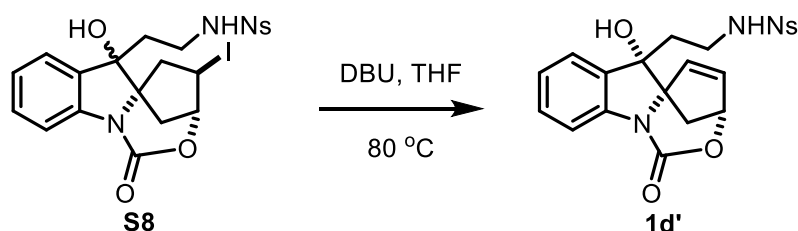

The above compound was prepared by following the same procedure as that for **S3**. Purification by silica gel chromatography, eluting with ethyl acetate/petroleum ether = 1/1 to afford the desired product **1d'** and its epimer (83%, dr = 3:1) as a colorless oil.

The major:  $^1\text{H}$  NMR (400 MHz, Chloroform- $d$ )  $\delta$  8.05 – 8.00 (m, 1H), 7.85 – 7.80 (m, 1H), 7.79 – 7.70 (m, 2H), 7.66 (d,  $J=8.0$  Hz, 1H), 7.19 (td,  $J=7.8, 1.3$  Hz, 1H), 7.01 (dd,  $J=7.6, 1.3$  Hz, 1H), 6.84 (td,  $J=7.5, 1.0$  Hz, 1H), 6.68 (dd,  $J=5.7, 1.1$  Hz, 1H), 6.37 (t,  $J=5.3$  Hz, 1H), 6.29 (dd,  $J=5.7, 2.6$  Hz, 1H), 5.31 – 5.25 (m, 1H), 4.19 (s, 1H), 3.25 (q,  $J=5.1, 3.9$  Hz, 2H), 2.35 (dd,  $J=11.3, 2.8$  Hz, 1H), 2.22 – 2.10 (m, 2H), 1.84 – 1.78 (m, 1H).

$^{13}\text{C}$  NMR (100 MHz, Chloroform- $d$ )  $\delta$  149.1, 147.9, 140.4, 139.2, 133.7, 133.2, 133.0, 132.8, 131.2, 131.0, 130.0, 125.3, 123.8, 123.6, 115.3, 81.5, 80.7, 78.9, 39.3, 39.1, 36.5.

HRMS-ESI ( $m/z$ ): calcd for  $\text{C}_{21}\text{H}_{20}\text{N}_3\text{O}_7\text{S}$   $[\text{M}+\text{H}]^+$ : 458.1022; found: 458.1006.

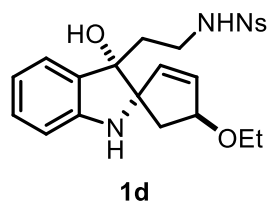

The above compound was prepared by following the same procedure as that for **1a**. Purification by silica gel chromatography, eluting with ethyl acetate/petroleum ether = 1/1 to afford the desired product **1d** (60% yield) as a brown oil.

$^1\text{H}$  NMR (400 MHz, Chloroform- $d$ )  $\delta$  8.07 – 8.01 (m, 1H), 7.88 – 7.83 (m, 1H), 7.78 – 7.67 (m, 2H), 7.02 (td,  $J=7.6, 1.3$  Hz, 1H), 6.85 (dd,  $J=7.6, 1.3$  Hz, 1H), 6.58 – 6.54 (m, 3H), 6.03 (dd,  $J=5.6, 2.3$  Hz, 1H), 5.93 (d,  $J=5.6$  Hz, 1H), 4.52 – 4.50 (m, 1H), 3.70 (s, 1H), 3.61 – 3.47 (m, 2H), 3.15 – 3.05 (m, 3H), 2.28 (dd,  $J=14.1, 2.7$  Hz, 1H),

2.11 – 1.99 (m, 3H), 1.22 (t,  $J = 7.0$  Hz, 3H).

$^{13}\text{C}$  NMR (100 MHz, Chloroform- $d$ )  $\delta$  148.1, 147.8, 138.3, 134.1, 133.5, 133.3, 132.5, 131.1, 131.0, 128.9, 125.0, 123.7, 119.5, 110.6, 83.6, 81.7, 81.6, 64.5, 39.9, 37.3, 35.7, 15.5.

HRMS-ESI ( $m/z$ ): calcd for  $\text{C}_{22}\text{H}_{26}\text{N}_3\text{O}_6\text{S}$   $[\text{M}+\text{H}]^+$ : 460.1542; found: 460.1554.

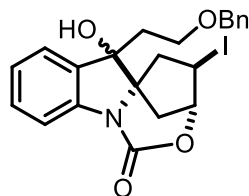

**S10**

The above compound was prepared by following the same procedure as that for **S8**. Purification by silica gel chromatography, eluting with ethyl acetate/petroleum ether = 1/3 to afford the desired product **S10** as a mixture of two epimers (96% combined yield, dr = 4:1).

The mixture (colorless oil):  $^1\text{H}$  NMR (400 MHz, Chloroform- $d$ )  $\delta$  7.89 – 7.85 (m, 0.28H), 7.82 (dd,  $J = 8.0, 0.9$  Hz, 0.96H), 7.45 – 7.31 (m, 6.70H), 7.30 – 7.23 (m, 1.65H), 7.13 – 7.00 (m, 2.27H), 5.04 (d,  $J = 3.1$  Hz, 2.00H), 4.96 (dd,  $J = 3.0, 1.1$  Hz, 0.26H), 4.71 (d,  $J = 11.9$  Hz, 0.29H), 4.61 (s, 2.07H), 4.52 – 4.42 (m, 1.29H), 3.99 – 3.87 (m, 0.54H), 3.81 (s, 0.26H), 3.76 – 3.67 (m, 1.02H), 3.67 – 3.60 (m, 1.02H), 2.87 (dd,  $J = 15.5, 5.2$  Hz, 1.05H), 2.78 (dd,  $J = 12.6, 2.9$  Hz, 1.17H), 2.74 – 2.62 (m, 1.56H), 2.61 – 2.53 (m, 0.46H), 2.42 – 2.36 (m, 0.31H), 2.32 – 2.25 (m, 1.03H), 2.21 (dq,  $J = 12.7, 1.2$  Hz, 1.03H), 2.11 – 1.99 (m, 0.31H), 1.75 – 1.65 (m, 1.23H).

$^{13}\text{C}$  NMR (100 MHz, Chloroform- $d$ )  $\delta$  148.2, 139.2, 137.9, 137.1, 136.7, 133.6, 133.0, 130.4, 129.4, 128.7, 128.6, 128.3, 128.3, 128.2, 128.1, 124.0, 123.8, 123.8, 122.8, 116.1, 115.6, 86.2, 85.8, 79.6, 79.3, 79.3, 77.9, 73.9, 73.7, 66.0, 65.6, 48.7, 46.4, 36.7, 34.3, 31.6, 30.5, 20.6, 19.6.

HRMS-ESI ( $m/z$ ): calcd for  $\text{C}_{22}\text{H}_{23}\text{INO}_4$   $[\text{M}+\text{H}]^+$ : 492.0672; found: 492.0671.

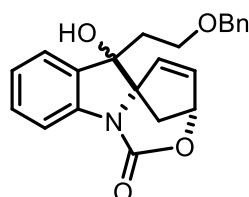

**1e'**

The above compound was prepared by following the same procedure as that for **1d'**. Purification by silica gel chromatography, eluting with ethyl acetate/petroleum ether = 1/2 to afford the desired product **1e'** as a mixture of two epimers (71% yield, dr = 4:1).

The mixture (colorless oil):  $^1\text{H}$  NMR (400 MHz, Chloroform- $d$ )  $\delta$  7.88 – 7.85 (m, 1.37H), 7.44 – 7.30 (m, 7.44H), 7.28 (d,  $J = 1.4$  Hz, 0.29H), 7.24 (d,  $J = 1.4$  Hz, 0.30H), 7.14 (dd,  $J = 7.6, 1.3$  Hz, 0.99H), 7.09 (td,  $J = 7.5, 1.1$  Hz, 0.41H), 7.03 (td,  $J = 7.5, 1.1$  Hz, 1.00H), 6.73 (dd,  $J = 5.7, 1.1$  Hz, 1.00H), 6.33 – 6.26 (m, 1.68H), 5.32 – 5.27 (m,



1.03H), 5.24 – 5.19 (m, 0.37H), 5.04 (s, 1.00H), 4.62 (s, 2.05H), 4.59 – 4.50 (m, 0.65H), 4.19 (s, 0.32H), 3.86 – 3.78 (m, 1.72H), 3.69 – 3.65 (m, 1.04H), 2.84 – 2.75 (m, 0.43H), 2.44 – 2.26 (m, 2.44H), 2.25 – 2.13 (m, 1.22H), 2.10 (dd,  $J = 11.9, 2.8$  Hz, 0.60H), 1.79 – 1.66 (m, 1.30H).

$^{13}\text{C}$  NMR (100 MHz, Chloroform-*d*)  $\delta$  148.8, 148.4, 141.4, 140.1, 139.7, 139.2, 136.9, 136.8, 133.4, 133.0, 132.5, 132.2, 130.4, 129.4, 128.7, 128.6, 128.3, 128.1, 128.0, 124.0, 123.8, 123.5, 123.2, 115.6, 115.1, 81.1, 80.3, 80.1, 79.9, 78.8, 77.8, 73.9, 73.7, 66.6, 66.2, 40.2, 39.3, 36.5, 35.0.

HRMS-ESI ( $m/z$ ): calcd for  $\text{C}_{22}\text{H}_{22}\text{NO}_4$   $[\text{M}+\text{H}]^+$ : 364.1549; found: 364.1566.

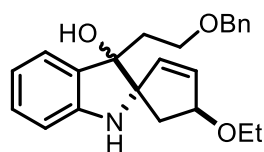

**1e**

The above compound was prepared by following the same procedure as that for **1a**. Purification by silica gel chromatography, eluting with ethyl acetate/petroleum ether = 1/1 to afford the desired product **1e** as a mixture of two epimers (52% yield).

The mixture (brown oil):  $^1\text{H}$  NMR (400 MHz, Chloroform-*d*)  $\delta$  7.42 – 7.30 (m, 4.99H), 7.12 – 7.06 (m, 1.87H), 6.80 – 6.76 (m, 1.00H), 6.60 – 6.57 (m, 1.02H), 6.10 (d,  $J = 5.9$  Hz, 1.02H), 5.97 (d,  $J = 5.8$  Hz, 1.02H), 4.71 – 4.68 (m, 0.90H), 4.55 – 4.52 (m, 2.23H), 4.18 (s, 0.86H), 3.87 – 3.78 (m, 0.44H), 3.75 – 3.69 (m, 0.98H), 3.65 – 3.51 (m, 3.87H), 2.70 (dd,  $J = 14.5, 3.0$  Hz, 0.17H), 2.37 – 2.19 (m, 2.81H), 2.13 – 2.03 (m, 0.28H), 2.00 – 1.86 (m, 1.06H), 1.24 (t,  $J = 6.8$  Hz, 3.82H).

$^{13}\text{C}$  NMR (100 MHz, Chloroform-*d*)  $\delta$  148.2, 147.9, 137.9, 137.5, 137.4, 137.2, 134.4, 133.2, 132.5, 132.3, 128.7, 128.4, 128.3, 128.2, 127.8, 127.8, 127.7, 127.6, 124.3, 124.1, 119.2, 119.0, 110.1, 109.8, 83.2, 83.0, 82.5, 82.1, 81.7, 81.1, 73.4, 73.2, 67.1, 66.8, 64.5, 64.1, 38.8, 37.6, 35.7, 34.8, 15.5, 15.4.

HRMS-ESI ( $m/z$ ): calcd for  $\text{C}_{23}\text{H}_{28}\text{NO}_3$   $[\text{M}+\text{H}]^+$ : 366.2069; found: 366.2072.

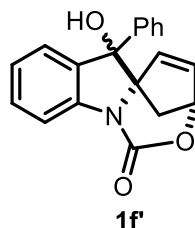

**1f**

The above compound was prepared by following the same procedure as that for **1a**. Purification by silica gel chromatography, eluting with ethyl acetate/petroleum ether = 1/3 to afford the desired product **1f** as a mixture of two epimers (86% combined yield,  $dr = 2.5:1$ ).

The mixture (white solid):  $^1\text{H}$  NMR (400 MHz, Chloroform-*d*)  $\delta$  7.97 – 7.89 (m, 1.37H), 7.53 (d,  $J = 7.2$  Hz, 1.00H), 7.46 – 7.35 (m, 2.93H), 7.34 – 7.20 (m, 5.48H), 7.17 – 7.11 (m, 3.42H), 6.94 (d,  $J = 5.6$  Hz, 1.05H), 6.34 (dd,  $J = 5.8, 2.5$  Hz, 1.00H), 6.06 (dd,  $J = 5.8, 2.5$  Hz, 0.42H), 5.87 (d,  $J = 5.7$  Hz, 0.40H), 5.32 – 5.24 (m, 0.42H), 5.14 – 5.07

(m, 0.98H), 3.32 (s, 1.00H), 2.69 (s, 0.44H), 2.46 (d,  $J = 11.8$  Hz, 0.47H), 2.37 (dd,  $J = 11.8, 2.6$  Hz, 0.45H), 1.72 (dd,  $J = 11.7, 2.7$  Hz, 1.11H), 1.38 (d,  $J = 11.7$  Hz, 1.16H).  $^{13}\text{C}$  NMR (100 MHz, Chloroform-*d*)  $\delta$  149.0, 148.7, 142.9, 141.4, 140.8, 140.5, 140.4, 139.3, 133.8, 132.9, 132.6, 132.2, 130.9, 130.4, 128.5, 128.4, 128.3, 127.9, 127.3, 125.9, 125.1, 124.5, 124.2, 124.1, 115.9, 115.4, 81.3, 81.2, 81.1, 80.9, 80.7, 42.2, 38.9. HRMS-ESI ( $m/z$ ): calcd for  $\text{C}_{19}\text{H}_{16}\text{NO}_3$   $[\text{M}+\text{H}]^+$ : 306.113; found: 306.1147.

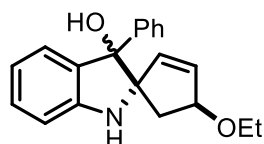

**1f**

The above compound was prepared by following the same procedure as that for **1a**. Purification by silica gel chromatography, eluting with ethyl acetate/petroleum ether = 1/3 to afford the desired product **1f** as a mixture of two epimers (72% yield).

The mixture (brown oil):  $^1\text{H}$  NMR (400 MHz, Chloroform-*d*)  $\delta$  7.42 – 7.34 (m, 1.92H), 7.34 – 7.27 (m, 3.29H), 7.25 – 7.22 (m, 1.13H), 7.21 – 7.20 (m, 0.30H), 7.19 – 7.18 (m, 0.40H), 7.17 – 7.15 (m, 0.96H), 7.13 – 7.11 (m, 1.04H), 6.85 – 6.80 (m, 1.33H), 6.75 – 6.72 (m, 1.28H), 6.22 (d,  $J = 5.6$  Hz, 1.00H), 6.08 (dd,  $J = 5.6, 2.3$  Hz, 0.98H), 5.79 (dd,  $J = 5.7, 2.4$  Hz, 0.34H), 5.42 (d,  $J = 5.7$  Hz, 0.34H), 4.56 – 4.50 (m, 0.36H), 4.48 – 4.40 (m, 1.00H), 4.11 (s, 0.34H), 3.80 (s, 1.26H), 3.64 – 3.43 (m, 0.83H), 3.39 – 3.23 (m, 2.09H), 3.05 (s, 1.03H), 2.84 (dd,  $J = 14.2, 2.4$  Hz, 0.40H), 1.95 (dd,  $J = 14.1, 6.0$  Hz, 0.41H), 1.83 – 1.71 (m, 2.09H), 1.25 (t,  $J = 7.0$  Hz, 1.44H), 1.15 (t,  $J = 7.0$  Hz, 2.98H).

$^{13}\text{C}$  NMR (100 MHz, Chloroform-*d*)  $\delta$  149.1, 148.9, 143.6, 142.6, 139.9, 138.1, 134.7, 134.1, 133.6, 132.2, 129.2, 129.1, 127.9, 127.7, 127.1, 126.6, 126.1, 125.0, 124.6, 120.1, 119.8, 110.5, 109.9, 84.3, 84.2, 84.1, 83.9, 82.2, 81.4, 64.4, 64.2, 39.9, 39.3, 15.5, 15.4.

HRMS-ESI ( $m/z$ ): calcd for  $\text{C}_{20}\text{H}_{22}\text{NO}_2$   $[\text{M}+\text{H}]^+$ : 308.1651; found: 308.1642.

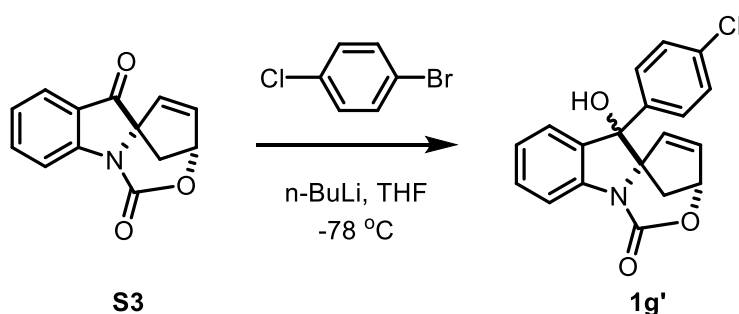

**S3**

**1g'**

To a solution of 4-bromochlorobenzene (256 mg, 1.34 mmol) in THF (10 mL) at  $-78$  °C was added *n*-BuLi (0.83 mL, 1.34 mmol, 1.6 M in hexane). After stirring for 0.5 h, **S3** (150 mg, 0.67 mmol, dissolved in 3 mL THF) was added. The mixture was stirred at  $-78$  °C for 2 h. The reaction was quenched with saturated ammonium chloride and extracted with ethyl acetate ( $3 \times 20$  mL). The combined organic layers were dried over anhydrous sodium sulfate, and concentrated under reduced pressure. The crude residue was purified by silica gel chromatography, eluting with ethyl acetate/petroleum ether =

1/3 to afforded the desired product **1g'** as a mixture of two epimers (190mg, 84% combined yield, dr = 4:1).

The mixture (colorless oil):  $^1\text{H NMR}$  (400 MHz, Chloroform-*d*)  $\delta$  7.91 – 7.89 (m, 1.23H), 7.50 – 7.45 (m, 0.51H), 7.43 – 7.35 (m, 1.77H), 7.31 – 7.26 (m, 2.22H), 7.22 (dd,  $J = 7.6, 1.3$  Hz, 1.00H), 7.17 – 7.05 (m, 3.14H), 6.92 (d,  $J = 5.6$  Hz, 1.00H), 6.34 (dd,  $J = 5.7, 2.6$  Hz, 0.96H), 6.09 (dd,  $J = 5.7, 2.6$  Hz, 0.25H), 5.85 (d,  $J = 5.7$  Hz, 0.26H), 5.30 – 5.24 (m, 0.24H), 5.16 – 5.06 (m, 0.98H), 3.40 (s, 0.99H), 2.76 (s, 0.26H), 2.49 – 2.40 (m, 0.26H), 2.33 (dd,  $J = 11.9, 2.7$  Hz, 0.26H), 1.71 (dd,  $J = 11.6, 2.7$  Hz, 1.01H), 1.40 (dd,  $J = 11.6, 1.1$  Hz, 1.02H).

$^{13}\text{C NMR}$  (100 MHz, Chloroform-*d*)  $\delta$  149.0, 148.7, 141.5, 141.3, 140.7, 140.3, 140.2, 137.9, 134.4, 133.9, 133.4, 133.0, 132.5, 132.2, 131.1, 130.6, 128.8, 128.6, 128.5, 127.5, 124.9, 124.7, 124.2, 124.1, 116.0, 115.5, 81.2, 81.0, 80.9, 80.8, 80.8, 80.7, 42.2, 38.9.

**HRMS-ESI** ( $m/z$ ): calcd for  $\text{C}_{19}\text{H}_{15}\text{ClNO}_3$   $[\text{M}+\text{H}]^+$ : 340.0740; found: 340.0740.

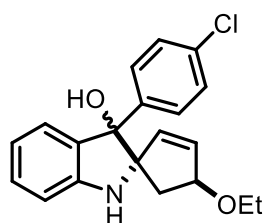

**1g**

The above compound was prepared by following the same procedure as that for **1a**. Purification by silica gel chromatography, eluting with ethyl acetate/petroleum ether = 1/3 to afforded the desired product **1g** as a mixture of two epimers (73% yield).

The mixture (brown oil):  $^1\text{H NMR}$  (400 MHz, Chloroform-*d*)  $\delta$  7.38 – 7.32 (m, 2.29H), 7.29 – 7.23 (m, 2.78H), 7.21 – 7.14 (m, 1.11H), 7.08 (dd,  $J = 7.5, 1.2$  Hz, 0.99H), 6.97 (d,  $J = 8.6$  Hz, 0.08H), 6.81 (td,  $J = 7.4, 1.0$  Hz, 1.07H), 6.73 (d,  $J = 7.8$  Hz, 0.99H), 6.18 (d,  $J = 5.6$  Hz, 1.00H), 6.08 (dd,  $J = 5.6, 2.3$  Hz, 0.94H), 5.82 (dd,  $J = 5.7, 2.4$  Hz, 0.09H), 5.42 (d,  $J = 5.7$  Hz, 0.10H), 4.53 – 4.48 (m, 0.14H), 4.46 – 4.41 (m, 0.94H), 3.81 (s, 0.95H), 3.63 – 3.46 (m, 0.42H), 3.42 – 3.26 (m, 2.02H), 3.23 (s, 0.71H), 2.80 (dd,  $J = 14.2, 2.3$  Hz, 0.11H), 1.93 (dd,  $J = 14.2, 6.0$  Hz, 0.15H), 1.81 (dd,  $J = 14.2, 5.9$  Hz, 1.01H), 1.71 (dd,  $J = 14.2, 3.1$  Hz, 1.00H), 1.25 (t,  $J = 7.0$  Hz, 0.62H), 1.15 (t,  $J = 7.0$  Hz, 2.81H).

$^{13}\text{C NMR}$  (100 MHz, Chloroform-*d*)  $\delta$  148.7, 142.3, 141.3, 139.7, 137.9, 134.3, 134.2, 133.2, 132.8, 132.5, 129.3, 129.3, 128.0, 128.0, 127.9, 127.9, 127.8, 127.7, 127.6, 124.8, 124.4, 120.2, 119.8, 110.6, 110.0, 84.1, 83.9, 83.9, 83.7, 82.1, 81.3, 64.3, 60.4, 39.9, 39.3, 15.3, 14.1.

**HRMS-ESI** ( $m/z$ ): calcd for  $\text{C}_{20}\text{H}_{21}\text{ClNO}_2$   $[\text{M}+\text{H}]^+$ : 340.1104; found: 340.1124.

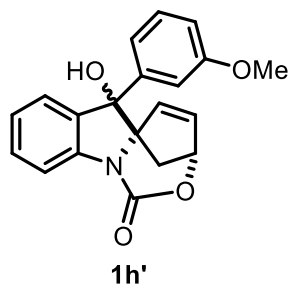

The above compound was prepared by following the same procedure as that for **1g'**. Purification by silica gel chromatography, eluting with ethyl acetate/petroleum ether = 1/3 to afforded the desired product **1h'** as a mixture of two epimers (76% combined yield, dr = 4:1).

The mixture (yellow solid): **<sup>1</sup>H NMR** (400 MHz, Chloroform-*d*)  $\delta$  7.86 (d,  $J$  = 8.0 Hz, 1.27H), 7.41 – 7.26 (m, 1.93H), 7.29 – 7.17 (m, 2.21H), 7.14 – 7.05 (m, 1.56H), 7.03 (d,  $J$  = 7.9 Hz, 0.30H), 6.94 (d,  $J$  = 5.7 Hz, 0.97H), 6.89 (d,  $J$  = 8.2 Hz, 0.29H), 6.83 – 6.76 (m, 1.97H), 6.60 (d,  $J$  = 7.7 Hz, 0.96H), 6.30 (dd,  $J$  = 5.4, 2.6 Hz, 0.96H), 6.07 – 6.01 (m, 0.27H), 5.88 (d,  $J$  = 5.6 Hz, 0.28H), 5.23 (s, 0.28H), 5.07 (s, 1.00H), 3.79 – 3.77 (m, 1.84H), 3.73 (s, 2.96H), 3.06 (s, 0.29H), 2.42 – 2.30 (m, 0.58H), 1.74 (d,  $J$  = 11.7 Hz, 1.02H), 1.41 (d,  $J$  = 11.6 Hz, 1.02H).

**<sup>13</sup>C NMR** (100 MHz, Chloroform-*d*)  $\delta$  159.6, 159.5, 149.1, 148.8, 144.7, 141.3, 141.1, 140.7, 140.6, 133.8, 132.7, 132.6, 132.1, 130.7, 130.2, 129.4, 129.3, 125.2, 124.5, 124.3, 124.0, 119.7, 118.6, 115.8, 115.3, 113.3, 113.3, 112.8, 111.9, 81.2, 81.2, 81.1, 81.0, 80.8, 80.7, 55.3, 55.2, 42.1, 38.9.

**HRMS-ESI** ( $m/z$ ): calcd for C<sub>20</sub>H<sub>18</sub>NO<sub>4</sub> [M+H]<sup>+</sup>: 336.1236; found: 336.1243.

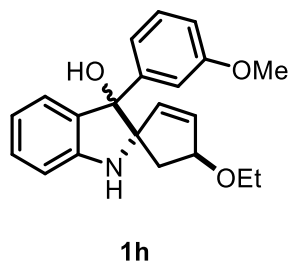

The above compound was prepared by following the same procedure as that for **1a**. Purification by silica gel chromatography, eluting with ethyl acetate/petroleum ether = 1/3 to afforded the desired product **1h** as a mixture of two epimers (65% yield).

The mixture (brown oil): **<sup>1</sup>H NMR** (400 MHz, Chloroform-*d*)  $\delta$  7.23 – 7.09 (m, 3.94H), 7.03 (dd,  $J$  = 2.6, 1.7 Hz, 1.00H), 6.99 – 6.90 (m, 1.29H), 6.89 – 6.69 (m, 4.04H), 6.21 (dd,  $J$  = 5.6, 0.7 Hz, 1.00H), 6.08 (dd,  $J$  = 5.6, 2.2 Hz, 1.02H), 5.79 (dd,  $J$  = 5.7, 2.4 Hz, 0.23H), 5.48 (d,  $J$  = 5.7 Hz, 0.24H), 4.56 – 4.50 (m, 0.25H), 4.48 – 4.42 (m, 1.00H), 3.76 (s, 4.49H), 3.61 – 3.44 (m, 0.71H), 3.36 – 3.32 (m, 2.14H), 3.07 (s, 1.02H), 2.82 (dd,  $J$  = 14.1, 2.5 Hz, 0.28H), 1.96 (dd,  $J$  = 14.1, 6.0 Hz, 0.27H), 1.90 – 1.73 (m, 2.10H), 1.24 (t,  $J$  = 7.0 Hz, 1.01H), 1.15 (t,  $J$  = 7.0 Hz, 3.13H).

**<sup>13</sup>C NMR** (100 MHz, Chloroform-*d*)  $\delta$  159.2, 159.1, 149.1, 148.8, 145.4, 144.3, 139.7, 138.1, 134.5, 134.1, 133.4, 132.2, 129.2, 129.1, 128.8, 128.6, 125.0, 124.5, 120.1, 119.7,

119.2, 118.6, 112.6, 112.3, 112.2, 112.0, 110.5, 109.9, 84.2, 84.1, 83.9, 82.2, 81.4, 64.3, 64.2, 55.1, 39.8, 39.4, 15.4, 15.4.

**HRMS-ESI** ( $m/z$ ): calcd for  $C_{21}H_{24}NO_3$   $[M+H]^+$ : 338.1756; found: 338.1748.

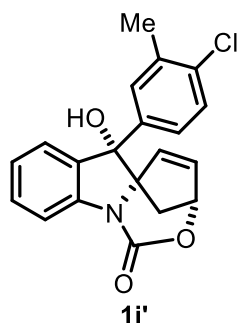

The above compound was prepared by following the same procedure as that for **1g'**. Purification by silica gel chromatography, eluting with ethyl acetate/petroleum ether = 1/3 to afforded the desired product **1i'** and its epimer (71% combined yield, dr = 6:1). The major (white solid):  **$^1H$  NMR** (400 MHz, Chloroform-*d*)  $\delta$  7.91 (d,  $J$  = 8.1 Hz, 1H), 7.38 (td,  $J$  = 7.8, 1.4 Hz, 1H), 7.28 – 7.24 (m, 1H), 7.21 (dd,  $J$  = 7.6, 1.4 Hz, 1H), 7.13 (td,  $J$  = 7.5, 1.0 Hz, 1H), 7.03 (d,  $J$  = 2.3 Hz, 1H), 6.92 (d,  $J$  = 5.6 Hz, 1H), 6.90 – 6.86 (m, 1H), 6.34 (dd,  $J$  = 5.7, 2.6 Hz, 1H), 5.14 – 5.08 (m, 1H), 3.32 (s, 1H), 2.32 (s, 3H), 1.72 (dd,  $J$  = 11.6, 2.7 Hz, 1H), 1.42 (d,  $J$  = 11.6 Hz, 1H).

**$^{13}C$  NMR** (100 MHz, Chloroform-*d*)  $\delta$  149.0, 141.5, 140.7, 140.4, 136.0, 134.1, 133.5, 133.0, 130.6, 128.9, 128.4, 124.9, 124.6, 124.1, 115.6, 81.2, 81.0, 80.8, 42.3, 20.2.

**HRMS-ESI** ( $m/z$ ): calcd for  $C_{20}H_{17}ClNO_3$   $[M+H]^+$ : 354.0897; found: 354.0906.

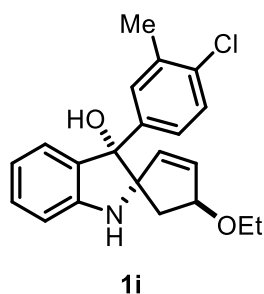

The above compound was prepared by following the same procedure as that for **1a**. Purification by silica gel chromatography, eluting with ethyl acetate/petroleum ether = 1/4 to afforded the desired product **1i** (72% yield) as a brown oil.

**$^1H$  NMR** (400 MHz, Chloroform-*d*)  $\delta$  7.30 (d,  $J$  = 2.2 Hz, 1H), 7.22 (d,  $J$  = 8.3 Hz, 1H), 7.16 (td,  $J$  = 7.7, 1.3 Hz, 1H), 7.13 – 7.07 (m, 2H), 6.81 (td,  $J$  = 7.4, 1.0 Hz, 1H), 6.73 (d,  $J$  = 7.8 Hz, 1H), 6.18 (d,  $J$  = 5.6 Hz, 1H), 6.08 (dd,  $J$  = 5.6, 2.3 Hz, 1H), 4.44 – 4.41 (m, 1H), 3.76 (s, 1H), 3.42 – 3.26 (m, 2H), 3.05 (s, 1H), 2.34 (s, 3H), 1.81 (dd,  $J$  = 14.2, 5.8 Hz, 1H), 1.73 (dd,  $J$  = 14.2, 3.1 Hz, 1H), 1.16 (t,  $J$  = 7.0 Hz, 3H).

**$^{13}C$  NMR** (100 MHz, Chloroform-*d*)  $\delta$  148.8, 142.4, 138.1, 135.2, 134.4, 134.2, 133.0, 129.2, 128.5, 128.5, 125.2, 124.4, 120.2, 110.6, 84.2, 83.9, 82.2, 64.3, 39.4, 20.2, 15.4.

**HRMS-ESI** ( $m/z$ ): calcd for  $C_{21}H_{23}ClNO_2$   $[M+H]^+$ : 356.1417; found: 356.1401.

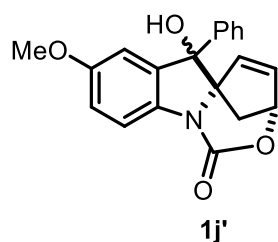

The above compound was prepared by following the same procedure as that for **1a'**. Purification by silica gel chromatography, eluting with ethyl acetate/petroleum ether = 1/3 to afforded the desired product **1j'** as a mixture of two epimers (82% combined yield, dr = 6.5:1).

The mixture (colorless oil): **<sup>1</sup>H NMR** (400 MHz, Chloroform-*d*)  $\delta$  7.82 – 7.76 (m, 1.15H), 7.54 – 7.49 (m, 0.34H), 7.43 – 7.40 (m, 0.52H), 7.35 – 7.27 (m, 3.92H), 7.18 – 7.10 (m, 1.99H), 6.96 – 6.86 (m, 2.15H), 6.83 (d,  $J$  = 2.6 Hz, 0.19H), 6.77 (d,  $J$  = 2.6 Hz, 1.00H), 6.30 (dd,  $J$  = 5.7, 2.6 Hz, 1.00H), 6.02 (dd,  $J$  = 5.7, 2.6 Hz, 0.15H), 5.86 (d,  $J$  = 5.8 Hz, 0.15H), 5.25 – 5.20 (m, 0.15H), 5.11 – 5.05 (m, 1.00H), 3.75 (s, 0.44H), 3.71 (s, 3.01H), 3.65 (s, 1.05H), 3.05 (s, 0.14H), 2.37 (d,  $J$  = 11.9 Hz, 0.15H), 2.32 (dd,  $J$  = 11.8, 2.6 Hz, 0.15H), 1.76 – 1.65 (m, 1.41H), 1.35 (dd,  $J$  = 11.6, 1.1 Hz, 1.01H).

**<sup>13</sup>C NMR** (100 MHz, Chloroform-*d*)  $\delta$  157.0, 156.6, 149.0, 142.8, 140.6, 140.5, 135.0, 134.3, 132.7, 132.0, 128.5, 128.3, 127.9, 127.2, 125.9, 116.6, 116.3, 116.1, 115.9, 110.4, 109.4, 81.3, 81.1, 81.1, 81.0, 55.8, 55.7, 42.2, 38.9.

**HRMS-ESI** ( $m/z$ ): calcd for C<sub>20</sub>H<sub>18</sub>NO<sub>4</sub> [M+H]<sup>+</sup>: 336.1236; found: 336.1233.

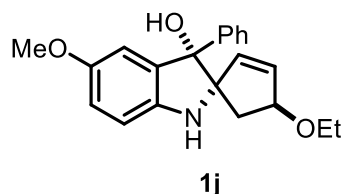

The above compound was prepared by following the same procedure as that for **1a**. Purification by silica gel chromatography, eluting with ethyl acetate/petroleum ether = 1/3 to afforded the desired product **1j** and its epimer (52% yield).

The major (brown oil): **<sup>1</sup>H NMR** (400 MHz, Chloroform-*d*)  $\delta$  7.38 – 7.36 (m, 2H), 7.32 – 7.20 (m, 3H), 6.77 – 6.66 (m, 3H), 6.20 (dd,  $J$  = 5.7, 2.5 Hz, 1H), 6.10 – 6.05 (m, 1H), 4.45 – 4.38 (m, 1H), 3.69 (s, 3H), 3.39 – 3.24 (m, 3H), 1.84 – 1.65 (m, 2H), 1.17 (t,  $J$  = 7.0 Hz, 3H).

**<sup>13</sup>C NMR** (100 MHz, Chloroform-*d*)  $\delta$  154.3, 143.6, 142.4, 138.6, 136.0, 133.9, 127.9, 127.0, 126.0, 115.5, 111.6, 109.5, 84.6, 84.4, 82.1, 64.2, 55.7, 39.1, 15.4.

**HRMS-ESI** ( $m/z$ ): calcd for C<sub>21</sub>H<sub>24</sub>NO<sub>3</sub> [M+H]<sup>+</sup>: 338.1756; found: 338.1761.

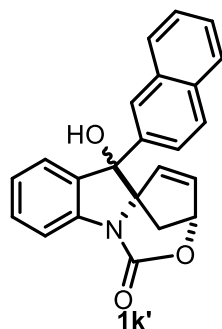

The above compound was prepared by following the same procedure as that for **1g'**. Purification by silica gel chromatography, eluting with ethyl acetate/petroleum ether = 1/3 to afford the desired product **1k'** as a mixture of two epimers (82% combined yield, dr = 7:1).

The mixture (white foam): <sup>1</sup>H NMR (400 MHz, Chloroform-*d*)  $\delta$  8.05 – 7.99 (m, 0.13H), 7.95 (d, *J* = 8.1 Hz, 1.08H), 7.87 – 7.85 (m, 0.30H), 7.84 – 7.80 (m, 1.11H), 7.79 – 7.70 (m, 1.99H), 7.62 (s, 0.89H), 7.59 – 7.57 (m, 0.23H), 7.56 – 7.53 (m, 0.25H), 7.52 – 7.45 (m, 2.06H), 7.42 – 7.39 (m, 1.04H), 7.33 – 7.29 (m, 0.29H), 7.26 – 7.20 (m, 2.96H), 7.18 – 7.13 (m, 0.17H), 7.12 (td, *J* = 7.5, 1.0 Hz, 1.05H), 6.98 (d, *J* = 5.6 Hz, 1.02H), 6.29 (dd, *J* = 5.7, 2.5 Hz, 1.00H), 5.97 (dd, *J* = 5.8, 2.5 Hz, 0.13H), 5.86 (d, *J* = 5.7 Hz, 0.14H), 5.24 – 5.20 (m, 0.15H), 5.06 – 5.01 (m, 1.01H), 3.72 (s, 1.02H), 2.96 (s, 0.13H), 2.51 – 2.37 (m, 0.26H), 1.71 (dd, *J* = 11.7, 2.7 Hz, 1.09H), 1.37 (d, *J* = 11.6 Hz, 1.10H).

<sup>13</sup>C NMR (100 MHz, Chloroform-*d*)  $\delta$  149.1, 148.9, 141.5, 140.8, 140.7, 140.5, 140.4, 136.9, 134.0, 133.0, 132.9, 132.8, 132.7, 132.2, 130.9, 130.4, 128.4, 128.3, 128.2, 128.1, 127.6, 127.5, 126.6, 126.6, 126.5, 126.4, 126.4, 125.2, 124.9, 124.8, 124.6, 124.4, 124.1, 124.1, 116.0, 115.5, 81.4, 81.2, 81.1, 80.9, 80.9, 42.2, 39.1.

HRMS-ESI (*m/z*): calcd for C<sub>23</sub>H<sub>18</sub>NO<sub>3</sub> [M+H]<sup>+</sup>: 356.1287; found: 356.1287.

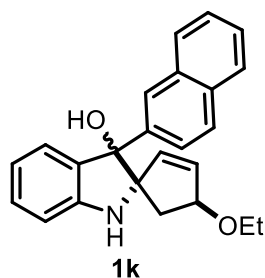

The above compound was prepared by following the same procedure as that for **1a**. Purification by silica gel chromatography, eluting with ethyl acetate/petroleum ether = 1/3 to afford the desired product **1k** as a mixture of two epimers (58% yield).

The mixture (brown oil): <sup>1</sup>H NMR (400 MHz, Chloroform-*d*)  $\delta$  7.98 (s, 0.99H), 7.86 – 7.77 (m, 2.72H), 7.77 – 7.71 (m, 1.27H), 7.52 – 7.40 (m, 3.73H), 7.25 – 7.12 (m, 2.39H), 6.88 – 6.75 (m, 2.40H), 6.27 (d, *J* = 5.6 Hz, 1.00H), 6.09 (dd, *J* = 5.6, 2.3 Hz, 0.99H), 5.76 (dd, *J* = 5.7, 2.3 Hz, 0.18H), 5.50 (d, *J* = 5.6 Hz, 0.17H), 4.57 – 4.50 (m, 0.18H), 4.42 – 4.41 (m, 1.00H), 4.27 (s, 0.18H), 3.85 (s, 1.06H), 3.61 – 3.46 (m, 0.49H), 3.34 – 3.17 (m, 2.96H), 2.93 (dd, *J* = 14.2, 2.4 Hz, 0.19H), 1.99 (dd, *J* = 14.2, 6.0 Hz, 0.20H),

1.84 (dd,  $J = 14.2, 5.7$  Hz, 1.00H), 1.78 (dd,  $J = 14.2, 3.3$  Hz, 1.04H), 1.26 (t,  $J = 7.0$  Hz, 0.82H), 1.10 (t,  $J = 7.0$  Hz, 3.00H).

$^{13}\text{C}$  NMR (100 MHz, Chloroform-*d*)  $\delta$  149.2, 148.9, 141.6, 140.4, 139.9, 138.3, 134.6, 133.9, 133.6, 133.0, 132.9, 132.8, 132.6, 132.3, 129.3, 129.2, 128.6, 128.4, 128.4, 128.0, 127.9, 127.5, 127.5, 127.4, 127.3, 127.2, 126.3, 126.1, 126.1, 125.9, 125.8, 125.7, 125.2, 125.1, 125.0, 124.6, 124.1, 123.3, 120.6, 120.1, 119.8, 110.5, 110.0, 84.4, 84.2, 84.0, 82.2, 81.4, 64.3, 64.2, 40.1, 39.4, 15.4, 15.3.

HRMS-ESI ( $m/z$ ): calcd for  $\text{C}_{24}\text{H}_{24}\text{NO}_2$   $[\text{M}+\text{H}]^+$ : 358.1807; found: 358.1797.

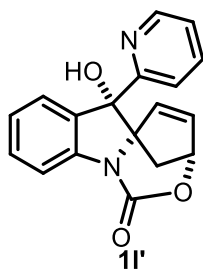

The above compound was prepared by following the same procedure as that for **1g'**. Purification by silica gel chromatography, eluting with ethyl acetate/petroleum ether = 1/2 to afford the desired product **11'** and its epimer (82% combined yield, dr = 5:1).

The major (colorless oil):  $^1\text{H}$  NMR (400 MHz, Chloroform-*d*)  $\delta$  8.65 – 8.63 (m, 1H), 7.98 (d,  $J = 8.1$  Hz, 1H), 7.78 (td,  $J = 7.7, 1.8$  Hz, 1H), 7.42 – 7.41 (m, 1H), 7.40 – 7.28 (m, 2H), 7.19 (dd,  $J = 7.8, 1.3$  Hz, 1H), 7.13 (td,  $J = 7.4, 1.1$  Hz, 1H), 6.16 – 7.14 (m, 1H), 5.90 – 5.88 (m, 1H), 5.74 (s, 1H), 5.28 – 5.27 (m, 1H), 2.46 (d,  $J = 11.8$  Hz, 1H), 2.30 (dd,  $J = 11.8, 2.7$  Hz, 1H).

$^{13}\text{C}$  NMR (100 MHz, Chloroform-*d*)  $\delta$  158.1, 148.7, 148.5, 142.2, 139.6, 137.1, 133.2, 131.1, 130.9, 125.5, 124.2, 123.5, 122.3, 115.8, 80.7, 80.6, 80.3, 39.5.

HRMS-ESI ( $m/z$ ): calcd for  $\text{C}_{18}\text{H}_{15}\text{N}_2\text{O}_3$   $[\text{M}+\text{H}]^+$ : 307.1083; found: 307.1082.

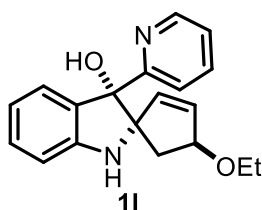

The above compound was prepared by following the same procedure as that for **1a**. Purification by silica gel chromatography, eluting with ethyl acetate/petroleum ether = 1/3 to afford the desired product **11** (80% yield) as a yellow oil.

$^1\text{H}$  NMR (400 MHz, Chloroform-*d*)  $\delta$  8.55 – 8.50 (m, 1H), 7.56 (td,  $J = 7.7, 1.8$  Hz, 1H), 7.21 – 7.10 (m, 3H), 7.07 (dd,  $J = 7.5, 1.2$  Hz, 1H), 6.78 (t,  $J = 7.4$  Hz, 1H), 6.69 (d,  $J = 7.8$  Hz, 1H), 6.38 – 6.30 (m, 2H), 5.97 (dd,  $J = 5.7, 1.8$  Hz, 1H), 4.61 – 4.58 (m, 1H), 3.71 (s, 1H), 3.53 – 3.32 (m, 2H), 1.90 (dd,  $J = 13.7, 6.5$  Hz, 1H), 1.41 (dd,  $J = 13.7, 5.8$  Hz, 1H), 1.14 (t,  $J = 7.0$  Hz, 3H).

$^{13}\text{C}$  NMR (100 MHz, Chloroform-*d*)  $\delta$  160.3, 149.1, 146.7, 137.3, 137.0, 133.2, 132.6, 129.2, 124.5, 122.5, 121.8, 120.0, 110.4, 83.3, 83.0, 82.6, 64.1, 39.3, 15.4.



**HRMS-ESI** ( $m/z$ ): calcd for  $C_{19}H_{21}N_2O_2$   $[M+H]^+$ : 309.1603; found: 309.1595.

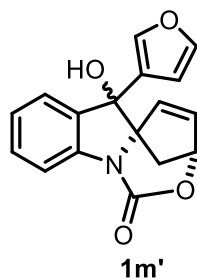

The above compound was prepared by following the same procedure as that for **1g'**. Purification by silica gel chromatography, eluting with ethyl acetate/petroleum ether = 1/3 to afford the desired product **1m'** as a mixture of two epimers (88% combined yield, dr = 5:1).

The mixture (white solid):  **$^1H$  NMR** (400 MHz, Chloroform-*d*)  $\delta$  7.96 – 7.86 (m, 1.18H), 7.53 – 7.48 (m, 0.41H), 7.43 – 7.30 (m, 3.37H), 7.15 – 7.11 (m, 1.25H), 7.04 (t,  $J$  = 1.2 Hz, 0.94H), 6.88 (d,  $J$  = 5.7 Hz, 1.00H), 6.41 – 6.40 (m, 0.20H), 6.37 (dd,  $J$  = 5.7, 2.6 Hz, 0.99H), 6.23 – 6.22 (m, 0.97H), 6.19 (dd,  $J$  = 5.7, 2.6 Hz, 0.27H), 6.07 (d,  $J$  = 5.6 Hz, 0.23H), 5.34 – 2.31 (m, 0.21H), 5.22 – 5.20 (m, 1.00H), 3.02 (s, 0.97H), 2.51 (s, 0.20H), 2.45 (d,  $J$  = 11.8 Hz, 0.23H), 2.38 (dd,  $J$  = 11.8, 2.6 Hz, 0.24H), 2.06 (dd,  $J$  = 11.5, 2.7 Hz, 1.03H), 1.73 (dd,  $J$  = 11.6, 1.1 Hz, 1.04H).

**$^{13}C$  NMR** (100 MHz, Chloroform-*d*)  $\delta$  149.0, 148.7, 143.8, 143.8, 141.0, 140.8, 140.7, 140.4, 140.0, 139.9, 133.0, 132.9, 132.5, 132.2, 131.1, 130.4, 129.4, 125.5, 124.4, 124.2, 124.0, 115.8, 115.4, 109.7, 108.9, 81.2, 81.2, 80.7, 80.5, 77.3, 77.2, 42.0, 39.0.

**HRMS-ESI** ( $m/z$ ): calcd for  $C_{17}H_{14}NO_4$   $[M+H]^+$ : 296.0923; found: 296.0915.

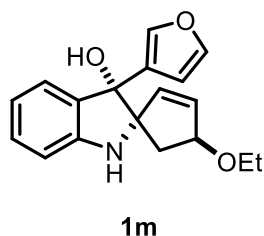

The above compound was prepared by following the same procedure as that for **1a**. Purification by silica gel chromatography, eluting with ethyl acetate/petroleum ether = 1/3 to afford the desired product **1m** and its epimer (60% yield).

The major (brown oil):  **$^1H$  NMR** (400 MHz, Chloroform-*d*)  $\delta$  7.33 – 7.29 (m, 2H), 7.20 (dd,  $J$  = 7.4, 1.2 Hz, 1H), 7.13 (td,  $J$  = 7.7, 1.3 Hz, 1H), 6.81 (td,  $J$  = 7.5, 1.0 Hz, 1H), 6.69 (d,  $J$  = 7.8 Hz, 1H), 6.33 – 6.29 (m, 1H), 6.16 (d,  $J$  = 5.7 Hz, 1H), 6.10 (dd,  $J$  = 5.7, 2.3 Hz, 1H), 4.49 – 4.48 (m, 1H), 3.76 (s, 1H), 3.43 (q,  $J$  = 7.0 Hz, 2H), 3.18 (s, 1H), 2.05 (dd,  $J$  = 14.2, 2.8 Hz, 1H), 1.92 (dd,  $J$  = 14.1, 5.9 Hz, 1H), 1.18 (t,  $J$  = 7.0 Hz, 3H).

**$^{13}C$  NMR** (100 MHz, Chloroform-*d*)  $\delta$  148.3, 142.9, 139.1, 138.1, 134.2, 133.7, 129.9, 129.1, 124.1, 120.0, 110.5, 109.6, 83.8, 82.1, 80.8, 64.3, 39.5, 15.4.

**HRMS-ESI** ( $m/z$ ): calcd for  $C_{18}H_{20}NO_3$   $[M+H]^+$ : 298.1443; found: 298.1441.

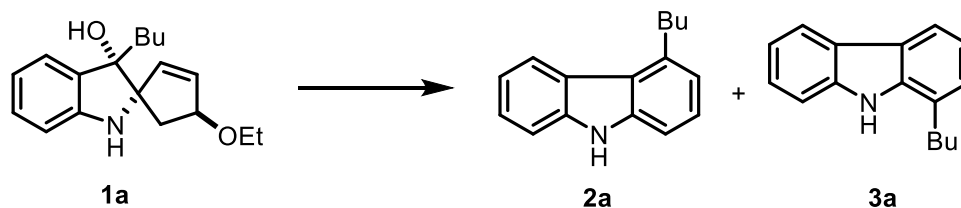

Condition 1: To a solution of **1a** (0.1 mmol) in CH<sub>3</sub>CN (1 mL) at 0 °C was added trifluoroacetic acid (8 μL, 0.1 mmol). The reaction was stirred for 12 h at 0 °C. The mixture was concentrated under reduced pressure and purified by silica gel chromatography, eluting with ethyl acetate/petroleum ether = 1/10 to afford the desired product **2a** and **3a** (78% yield, **2a:3a** = 3:1).

Condition 2: To a solution of **1a** (0.1 mmol) in 1,2-dichloroethane (1 mL) at RT was added **4c** (20 mg, 0.02 mmol). The reaction was stirred for 12 h at RT. The mixture was concentrated under reduced pressure and purified by silica gel chromatography, eluting with ethyl acetate/petroleum ether = 1/10 to afford the desired product **2a** and **3a** (80% yield, **2a:3a** < 1:10).

**2a** (white solid): <sup>1</sup>H NMR (400 MHz, Chloroform-*d*) δ 8.12 (d, *J* = 7.9 Hz, 1H), 8.08 (s, 1H), 7.48 – 7.39 (m, 2H), 7.37 – 7.32 (m, 1H), 7.31 – 7.23 (m, 2H), 7.03 (d, *J* = 7.1 Hz, 1H), 3.29 – 3.18 (m, 2H), 1.84 (tt, *J* = 7.8, 6.6 Hz, 2H), 1.59 – 1.54 (m, 2H), 1.01 (t, *J* = 7.4 Hz, 3H).

<sup>13</sup>C NMR (100 MHz, Chloroform-*d*) δ 139.8, 139.4, 138.4, 125.6, 125.1, 123.3, 122.6, 121.2, 120.1, 119.4, 110.4, 108.1, 34.2, 31.9, 22.9, 14.1.

HRMS-ESI (*m/z*): calcd for C<sub>16</sub>H<sub>18</sub>N [M+H]<sup>+</sup>: 224.1439; found: 224.1432.

**3a** (white solid): <sup>1</sup>H NMR (400 MHz, Chloroform-*d*) δ 8.08 (d, *J* = 7.8 Hz, 1H), 7.99 (s, 1H), 7.95 (d, *J* = 7.6 Hz, 1H), 7.47 (d, *J* = 8.0 Hz, 1H), 7.45 – 7.39 (m, 1H), 7.27 – 7.17 (m, 3H), 2.91 (t, *J* = 7.7 Hz, 2H), 1.83 – 1.74 (m, 2H), 1.54 – 1.41 (m, 2H), 0.99 (t, *J* = 7.3 Hz, 3H).

<sup>13</sup>C NMR (100 MHz, Chloroform-*d*) δ 139.3, 138.3, 125.6, 125.4, 124.6, 123.8, 123.0, 120.4, 119.5, 119.4, 117.9, 110.6, 31.7, 31.2, 22.7, 14.0.

HRMS-ESI (*m/z*): calcd for C<sub>16</sub>H<sub>18</sub>N [M+H]<sup>+</sup>: 224.1439; found: 224.1433.

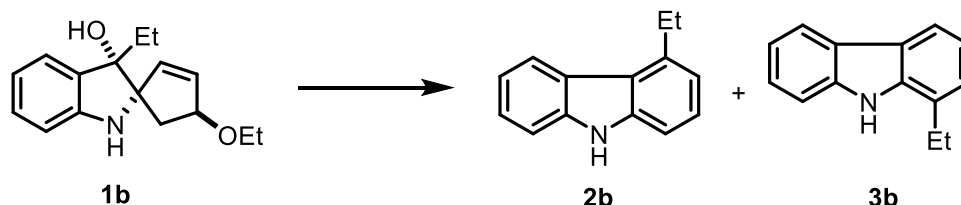

Condition 1: Purification by silica gel chromatography, eluting with ethyl acetate/petroleum ether = 1/10 to afford the desired product **2b** and **3b** (85% yield, **2b:3b** = 3:1).

Condition 2: Purification by silica gel chromatography, eluting with ethyl acetate/petroleum ether = 1/10 to afford the desired product **2b** and **3b** (82% yield, **2b:3b** < 1:10).

**2b** (white solid):  $^1\text{H NMR}$  (400 MHz, Chloroform-*d*)  $\delta$  8.16 (d,  $J = 7.9$  Hz, 1H), 8.08 (s, 1H), 7.47 – 7.42 (m, 2H), 7.40 – 7.34 (m, 1H), 7.33 – 7.23 (m, 2H), 7.07 (d,  $J = 7.2$  Hz, 1H), 3.29 (q,  $J = 7.5$  Hz, 2H), 1.48 (t,  $J = 7.5$  Hz, 3H).

$^{13}\text{C NMR}$  (100 MHz, Chloroform-*d*)  $\delta$  139.7, 139.5, 125.8, 125.1, 123.3, 122.7, 121.1, 119.4, 119.0, 110.4, 108.2, 27.3, 14.1.

**HRMS-ESI** ( $m/z$ ): calcd for  $\text{C}_{14}\text{H}_{14}\text{N}$   $[\text{M}+\text{H}]^+$ : 196.1126; found: 196.1119.

**3b** (white solid):  $^1\text{H NMR}$  (400 MHz, Chloroform-*d*)  $\delta$  8.08 (d,  $J = 7.8$  Hz, 1H), 7.99 (s, 1H), 7.95 (d,  $J = 7.7$  Hz, 1H), 7.47 (d,  $J = 8.1$  Hz, 1H), 7.42 (t,  $J = 7.5$  Hz, 1H), 7.30 – 7.15 (m, 3H), 2.95 (q,  $J = 7.6$  Hz, 2H), 1.43 (t,  $J = 7.6$  Hz, 3H).

$^{13}\text{C NMR}$  (100 MHz, Chloroform-*d*)  $\delta$  139.4, 138.2, 125.9, 125.6, 124.4, 123.9, 123.0, 120.4, 119.7, 119.4, 117.9, 110.6, 24.2, 13.8.

**HRMS-ESI** ( $m/z$ ): calcd for  $\text{C}_{14}\text{H}_{14}\text{N}$   $[\text{M}+\text{H}]^+$ : 196.1126; found: 196.1124.

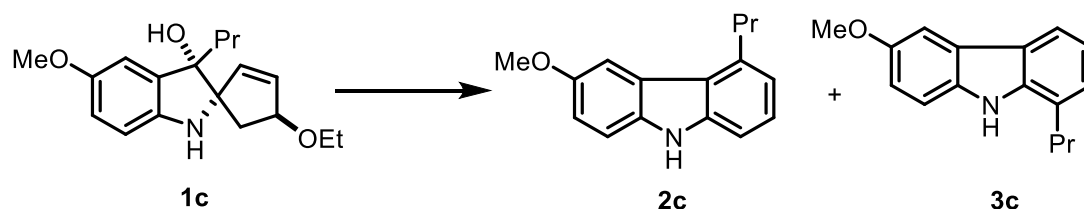

Condition 1: Purification by silica gel chromatography, eluting with ethyl acetate/petroleum ether = 1/10 to afford the desired product **2c** and **3c** (75% yield, **2c:3c** = 2.5:1).

Condition 2: The reaction was stirred for 12 h at 50 °C. Purification by silica gel chromatography, eluting with ethyl acetate/petroleum ether = 1/10 to afford the desired product **2c** and **3c** (60% yield, **2c:3c** < 1:10).

**2c** (white solid):  $^1\text{H NMR}$  (400 MHz, Chloroform-*d*)  $\delta$  7.91 – 7.85 (m, 2H), 7.54 (d,  $J = 2.4$  Hz, 1H), 7.36 (d,  $J = 8.7$  Hz, 1H), 7.22 (d,  $J = 7.2$  Hz, 1H), 7.16 (t,  $J = 7.5$  Hz, 1H), 7.06 (dd,  $J = 8.9, 2.5$  Hz, 1H), 3.93 (s, 3H), 2.86 (t,  $J = 7.7$  Hz, 2H), 1.82 (h,  $J = 7.4$  Hz, 2H), 1.04 (t,  $J = 7.3$  Hz, 3H).

$^{13}\text{C NMR}$  (100 MHz, Chloroform-*d*)  $\delta$  153.8, 139.2, 134.2, 125.4, 124.6, 124.2, 123.0, 119.2, 117.9, 114.9, 111.3, 103.1, 56.0, 33.5, 22.7, 14.2.

**HRMS-ESI** ( $m/z$ ): calcd for  $\text{C}_{16}\text{H}_{18}\text{NO}$   $[\text{M}+\text{H}]^+$ : 240.1388; found: 240.1383.

**3c** (white solid):  $^1\text{H NMR}$  (400 MHz, Chloroform-*d*)  $\delta$  7.96 (s, 1H), 7.62 (d,  $J = 2.4$  Hz, 1H), 7.33 (dd,  $J = 13.8, 8.1$  Hz, 2H), 7.28 – 7.24 (m, 1H), 7.08 (dd,  $J = 8.9, 2.4$  Hz, 1H), 6.99 (d,  $J = 7.1$  Hz, 1H), 3.94 (s, 3H), 3.23 – 3.14 (m, 2H), 1.89 (h,  $J = 7.4$  Hz, 2H), 1.12 (t,  $J = 7.3$  Hz, 3H).

$^{13}\text{C NMR}$  (100 MHz, Chloroform-*d*)  $\delta$  153.6, 140.7, 138.1, 134.4, 125.6, 123.7, 121.2, 119.8, 113.6, 110.8, 108.4, 106.4, 56.1, 36.5, 23.0, 14.3.

**HRMS-ESI** ( $m/z$ ): calcd for  $\text{C}_{16}\text{H}_{18}\text{NO}$   $[\text{M}+\text{H}]^+$ : 240.1388; found: 240.138.

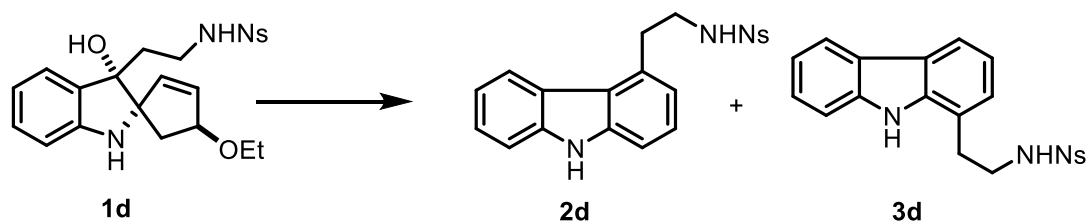

Condition 1: Purification by silica gel chromatography, eluting with ethyl acetate/petroleum ether = 1/4 to afford the desired product **2d** and **3d** (68% yield, **2d:3d** = 3.5:1).

Condition 2: The reaction was stirred for 12 h at 50 °C. Purification by silica gel chromatography, eluting with ethyl acetate/petroleum ether = 1/4 to afford the desired product **2d** and **3d** (61% yield, **2d:3d** < 1:10).

**2d** (yellow solid):  $^1\text{H NMR}$  (400 MHz, Chloroform-*d*)  $\delta$  8.10 (s, 1H), 7.99 – 7.93 (m, 2H), 7.70 (d,  $J = 1.4$  Hz, 1H), 7.55 (td,  $J = 7.7, 1.5$  Hz, 1H), 7.49 (td,  $J = 7.6, 1.4$  Hz, 1H), 7.45 – 7.40 (m, 2H), 7.33 – 7.28 (m, 2H), 7.23 – 7.19 (m, 1H), 6.97 – 6.95 (m, 1H), 5.43 (t,  $J = 5.8$  Hz, 1H), 3.64 (q,  $J = 6.7$  Hz, 2H), 3.48 (t,  $J = 7.1$  Hz, 2H).

$^{13}\text{C NMR}$  (100 MHz, Chloroform-*d*)  $\delta$  147.5, 140.0, 139.5, 133.5, 133.2, 132.5, 132.4, 130.9, 126.0, 125.6, 125.2, 122.5, 122.1, 121.0, 119.8, 110.7, 109.6, 43.2, 34.3.

**HRMS-ESI** ( $m/z$ ): calcd for  $\text{C}_{20}\text{H}_{18}\text{N}_3\text{O}_4\text{S}$   $[\text{M}+\text{H}]^+$ : 396.1018; found: 396.1014.

**3d** (yellow solid):  $^1\text{H NMR}$  (400 MHz, Chloroform-*d*)  $\delta$  8.40 (s, 1H), 8.01 (d,  $J = 7.8$  Hz, 1H), 7.97 – 7.88 (m, 2H), 7.68 – 7.62 (m, 1H), 7.56 – 7.49 (m, 2H), 7.49 – 7.39 (m, 2H), 7.26 – 7.21 (m, 1H), 7.18 – 7.09 (m, 2H), 5.61 (t,  $J = 6.0$  Hz, 1H), 3.55 (q,  $J = 6.8$  Hz, 2H), 3.20 (t,  $J = 7.1$  Hz, 2H).

$^{13}\text{C NMR}$  (100 MHz, Chloroform-*d*)  $\delta$  147.5, 139.5, 138.5, 133.5, 133.3, 132.7, 130.3, 126.0, 126.0, 125.2, 123.5, 120.3, 119.7, 119.6, 119.6, 119.2, 110.9, 44.0, 32.7.

**HRMS-ESI** ( $m/z$ ): calcd for  $\text{C}_{20}\text{H}_{18}\text{N}_3\text{O}_4\text{S}$   $[\text{M}+\text{H}]^+$ : 396.1018; found: 396.1015.

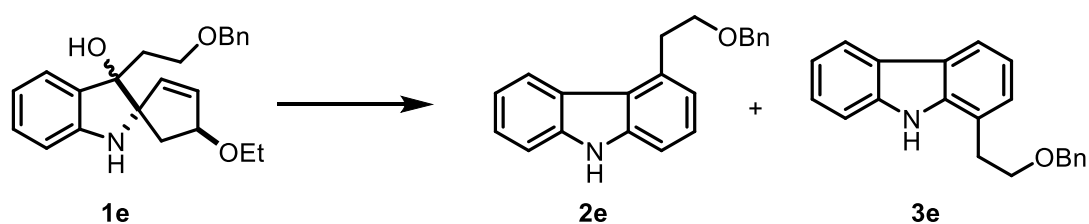

Condition 1: Purification by silica gel chromatography, eluting with ethyl acetate/petroleum ether = 1/20 to afford the desired product **2e** and **3e** (70% yield, **2e:3e** = 2.7:1).

Condition 2: The reaction was stirred for 12 h at 50 °C. Purification by silica gel chromatography, eluting with ethyl acetate/petroleum ether = 1/20 to afford the desired product **2e** and **3e** (60% yield, **2e:3e** < 1:10).

**2e** (colorless oil):  $^1\text{H NMR}$  (400 MHz, Chloroform-*d*)  $\delta$  8.16 – 8.07 (m, 2H), 7.46 – 7.39 (m, 2H), 7.43 – 7.25 (m, 7H), 7.29 – 7.19 (m, 1H), 7.08 (d,  $J = 1.3$  Hz, 1H), 4.60 (s, 2H), 3.96 – 3.91 (m, 2H), 3.59 (t,  $J = 7.7$  Hz, 2H).

$^{13}\text{C}$  NMR (100 MHz, Chloroform-*d*)  $\delta$  139.8, 139.5, 138.4, 133.8, 128.4, 127.7, 127.6, 125.7, 125.3, 123.1, 122.4, 121.6, 120.8, 119.6, 110.5, 108.8, 73.1, 69.8, 34.8.

HRMS-ESI (*m/z*): calcd for  $\text{C}_{21}\text{H}_{20}\text{NO}$   $[\text{M}+\text{H}]^+$ : 302.1545; found: 302.1543.

**3e** (colorless oil):  $^1\text{H}$  NMR (400 MHz, Chloroform-*d*)  $\delta$  9.29 (s, 1H), 8.13 – 8.06 (m, 1H), 8.01 (dd,  $J = 7.5, 1.3$  Hz, 1H), 7.47 – 7.31 (m, 6H), 7.27 – 7.15 (m, 4H), 4.57 (s, 2H), 4.09 – 3.85 (m, 2H), 3.27 (t,  $J = 5.4$  Hz, 2H).

$^{13}\text{C}$  NMR (100 MHz, Chloroform-*d*)  $\delta$  139.7, 137.7, 128.6, 128.1, 128.0, 126.5, 125.5, 123.6, 123.4, 123.1, 120.2, 119.1, 119.0, 118.7, 110.9, 73.7, 72.1, 34.1.

HRMS-ESI (*m/z*): calcd for  $\text{C}_{21}\text{H}_{20}\text{NO}$   $[\text{M}+\text{H}]^+$ : 302.1545; found: 302.1543.

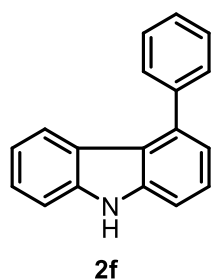

Condition 1: Purification by silica gel chromatography, eluting with ethyl acetate/petroleum ether = 1/10 to afford the desired product **2f** (87% yield) as a white solid.

$^1\text{H}$  NMR (400 MHz, Chloroform-*d*)  $\delta$  8.06 (s, 1H), 7.71 – 7.65 (m, 2H), 7.61 – 7.46 (m, 5H), 7.43 – 7.38 (m, 3H), 7.16 (dd,  $J = 7.2, 1.1$  Hz, 1H), 7.06 – 7.00 (m, 1H).

$^{13}\text{C}$  NMR (100 MHz, Chloroform-*d*)  $\delta$  141.2, 139.8, 139.7, 137.7, 129.2, 128.4, 127.5, 125.6, 125.6, 122.9, 122.4, 121.1, 120.7, 119.0, 110.4, 109.5.

HRMS-ESI (*m/z*): calcd for  $\text{C}_{18}\text{H}_{14}\text{N}$   $[\text{M}+\text{H}]^+$ : 244.1126; found: 244.1121.

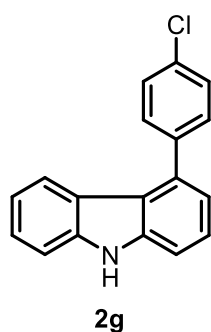

Condition 1: Purification by silica gel chromatography, eluting with ethyl acetate/petroleum ether = 1/10 to afford the desired product **2g** (82% yield) as a white solid.

$^1\text{H}$  NMR (400 MHz, Chloroform-*d*)  $\delta$  8.16 (s, 1H), 7.60 – 7.55 (m, 2H), 7.55 – 7.47 (m, 3H), 7.48 – 7.41 (m, 3H), 7.38 – 7.36 (m, 1H), 7.08 (dd,  $J = 6.1, 2.2$  Hz, 1H), 7.05 – 7.01 (m, 1H).

$^{13}\text{C}$  NMR (100 MHz, Chloroform-*d*)  $\delta$  139.8, 139.7, 139.6, 136.3, 133.4, 130.5, 128.6, 125.8, 125.6, 122.6, 122.2, 121.0, 120.6, 119.1, 110.5, 109.8.

HRMS-ESI (*m/z*): calcd for  $\text{C}_{18}\text{H}_{13}\text{ClN}$   $[\text{M}+\text{H}]^+$ : 278.0737; found: 278.0736.

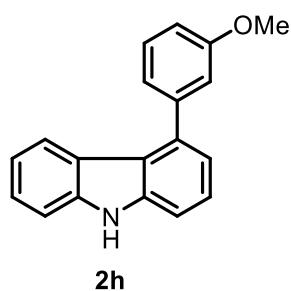

Condition 1: Purification by silica gel chromatography, eluting with ethyl acetate/petroleum ether = 1/10 to afford the desired product **2h** (88% yield) as a colorless oil.

<sup>1</sup>H NMR (400 MHz, Chloroform-*d*)  $\delta$  8.12 (s, 1H), 7.57 (dt,  $J$  = 8.1, 1.0 Hz, 1H), 7.50 – 7.34 (m, 5H), 7.28 – 7.23 (m, 1H), 7.21 – 7.20 (m, 1H), 7.15 (dd,  $J$  = 7.1, 1.2 Hz, 1H), 7.09 – 6.99 (m, 2H), 3.87 (s, 3H).

<sup>13</sup>C NMR (100 MHz, Chloroform-*d*)  $\delta$  159.5, 142.6, 139.7, 139.6, 137.5, 129.4, 125.7, 125.5, 122.8, 122.5, 121.6, 120.9, 120.6, 119.0, 114.3, 113.5, 110.4, 109.6, 55.3.

HRMS-ESI ( $m/z$ ): calcd for C<sub>19</sub>H<sub>16</sub>NO [M+H]<sup>+</sup>: 274.1232; found: 274.1231.

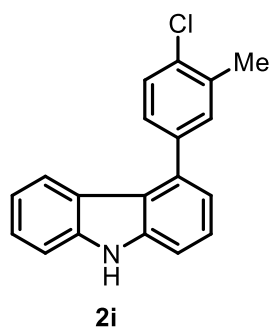

Condition 1: Purification by silica gel chromatography, eluting with ethyl acetate/petroleum ether = 1/10 to afford the desired product **2i** (78% yield) as a white solid.

<sup>1</sup>H NMR (400 MHz, Chloroform-*d*)  $\delta$  8.13 (s, 1H), 7.55 – 7.48 (m, 3H), 7.48 – 7.34 (m, 5H), 7.09 (dd,  $J$  = 6.7, 1.5 Hz, 1H), 7.05 – 7.01 (m, 1H), 2.49 (s, 3H).

<sup>13</sup>C NMR (100 MHz, Chloroform-*d*)  $\delta$  139.8, 139.8, 139.7, 136.6, 136.0, 133.6, 131.7, 129.0, 127.9, 125.8, 125.6, 122.8, 122.3, 121.0, 120.6, 119.2, 110.5, 109.7, 20.1.

HRMS-ESI ( $m/z$ ): calcd for C<sub>19</sub>H<sub>15</sub>ClN [M+H]<sup>+</sup>: 292.0893; found: 292.0901.

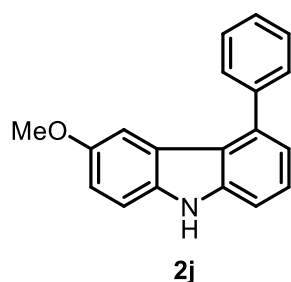

Condition 1: Purification by silica gel chromatography, eluting with ethyl acetate/petroleum ether = 1/10 to afford the desired product **2j** (89% yield) as a white solid.

**<sup>1</sup>H NMR** (400 MHz, Chloroform-*d*)  $\delta$  8.00 (s, 1H), 7.65 (d,  $J$  = 7.4 Hz, 2H), 7.59 – 7.31 (m, 6H), 7.16 – 6.90 (m, 3H), 3.64 (s, 3H).

**<sup>13</sup>C NMR** (100 MHz, Chloroform-*d*)  $\delta$  153.1, 141.0, 140.5, 137.6, 134.5, 129.3, 128.2, 127.5, 125.5, 123.3, 120.7, 120.5, 114.8, 111.0, 109.7, 105.2, 55.5.

**HRMS-ESI** ( $m/z$ ): calcd for C<sub>19</sub>H<sub>16</sub>NO [M+H]<sup>+</sup>: 274.1232; found: 274.1228.

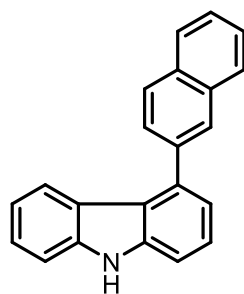

**2k**

Condition 1: Purification by silica gel chromatography, eluting with ethyl acetate/petroleum ether = 1/10 to afford the desired product **2k** (75% yield) as a yellow soil.

**<sup>1</sup>H NMR** (400 MHz, Chloroform-*d*)  $\delta$  8.16 – 8.09 (m, 2H), 8.06 – 7.98 (m, 2H), 7.97 – 7.92 (m, 1H), 7.82 (dd,  $J$  = 8.3, 1.7 Hz, 1H), 7.62 – 7.56 (m, 2H), 7.52 (dd,  $J$  = 8.1, 6.5 Hz, 2H), 7.48 – 7.34 (m, 3H), 7.27 – 7.22 (m, 1H), 6.96 (ddd,  $J$  = 8.1, 6.9, 1.2 Hz, 1H).

**<sup>13</sup>C NMR** (100 MHz, Chloroform-*d*)  $\delta$  139.9, 139.7, 138.8, 137.6, 133.5, 132.8, 128.2, 127.8, 127.8, 127.7, 126.2, 126.0, 125.7, 122.9, 122.5, 121.4, 120.9, 119.1, 110.4, 109.6.

**HRMS-ESI** ( $m/z$ ): calcd for C<sub>22</sub>H<sub>16</sub>N [M+H]<sup>+</sup>: 294.1283; found: 294.1283.

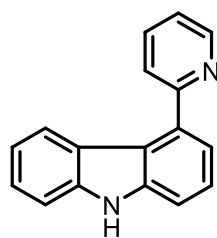

**2l**

Condition 1: Purification by silica gel chromatography, eluting with ethyl acetate/petroleum ether = 1/3 to afford the desired product **2l** (89% yield) as a yellow solid.

**<sup>1</sup>H NMR** (400 MHz, Chloroform-*d*)  $\delta$  8.86 – 8.54 (m, 1H), 8.54 (s, 1H), 7.87 (td,  $J$  = 7.7, 1.9 Hz, 1H), 7.73 (dt,  $J$  = 7.8, 1.2 Hz, 1H), 7.63 – 7.57 (m, 1H), 7.48 – 7.27 (m, 6H), 7.04 – 7.00 (m, 1H).

**<sup>13</sup>C NMR** (100 MHz, Chloroform-*d*)  $\delta$  159.5, 149.4, 140.1, 139.9, 136.5, 136.0, 125.7, 125.5, 124.2, 122.7, 122.4, 122.4, 121.0, 120.4, 118.9, 110.8, 110.5.

**HRMS-ESI** ( $m/z$ ): calcd for C<sub>17</sub>H<sub>13</sub>N<sub>2</sub> [M+H]<sup>+</sup>: 245.1079; found: 245.1077.

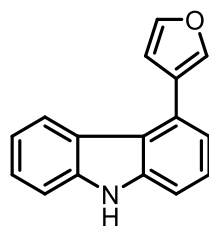

**2m**

Condition 1: Purification by silica gel chromatography, eluting with ethyl acetate/petroleum ether = 1/5 to afford the desired product **2m** (64% yield) as a brown oil.

<sup>1</sup>H NMR (400 MHz, Chloroform-*d*)  $\delta$  8.12 (s, 1H), 7.96 (d, *J* = 8.0 Hz, 1H), 7.72 (s, 1H), 7.64 (t, *J* = 1.7 Hz, 1H), 7.45 – 7.36 (m, 4H), 7.17 – 7.08 (m, 2H), 6.79 (dd, *J* = 1.8, 0.9 Hz, 1H).

<sup>13</sup>C NMR (100 MHz, Chloroform-*d*)  $\delta$  142.8, 140.0, 139.9, 139.6, 128.1, 125.7, 125.6, 125.4, 123.0, 122.5, 121.4, 121.3, 119.2, 112.2, 110.4, 109.8.

HRMS-ESI (*m/z*): calcd for C<sub>16</sub>H<sub>12</sub>NO [M+H]<sup>+</sup>: 234.0919; found: 234.0922.

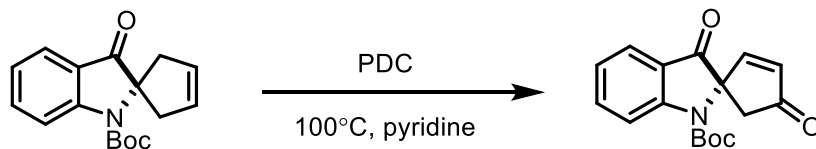

**7**

**8**

The corresponding compound **7** (0.3 mmol) was dissolved in pyridine (3.0 mL), followed by the addition of PDC (1.5 mmol). Then, the reaction mixture was stirred for 10h at 100°C. After completion, the reaction solution was concentrated under reduced pressure. The crude products were purified by silica gel chromatography, eluting with ethyl acetate/petroleum ether = 1/5 to afford the desired product **8** (55% yield) as a yellow solid.

<sup>1</sup>H NMR (400 MHz, CDCl<sub>3</sub>)  $\delta$  8.31 (s, 1H), 7.77 (d, *J* = 7.7 Hz, 1H), 7.72 (t, *J* = 7.8 Hz, 1H), 7.21 (dd, *J* = 15.1, 6.7 Hz, 2H), 6.48 (d, *J* = 5.5 Hz, 1H), 2.90 (d, *J* = 17.8 Hz, 1H), 2.70 (d, *J* = 17.8 Hz, 1H), 1.50 (s, 9H).

<sup>13</sup>C NMR (100 MHz, CDCl<sub>3</sub>)  $\delta$  205.1, 196.0, 158.4, 150.1, 138.1, 136.1, 124.8, 123.7, 121.8, 117.1, 83.8, 74.8, 43.3, 28.1.

HRMS-ESI (*m/z*): calcd for C<sub>17</sub>H<sub>16</sub>NO<sub>4</sub> [M-H]<sup>+</sup>: 298.1079; found: 298.1083.

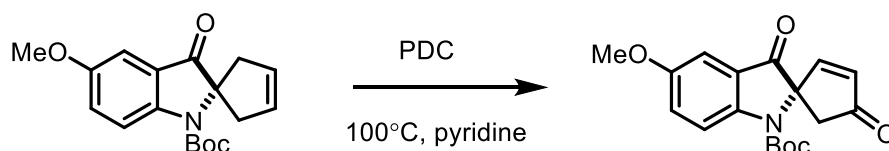

**7a**

**8a**

The above compound **7a** was prepared by following the same procedure as that for **8a**. Purification by silica gel chromatography, eluting with ethyl acetate/petroleum ether = 1/5 to afford the desired product **8a** (51% yield) as a white solid.



**<sup>1</sup>H NMR** (400 MHz, CDCl<sub>3</sub>) δ 8.30 (s, 1H), 7.39 – 7.29 (m, 1H), 7.21 (d, *J* = 5.9 Hz, 2H), 6.50 (d, *J* = 5.5 Hz, 1H), 3.87 (s, 3H), 2.93 (d, *J* = 17.0 Hz, 1H), 2.73 (d, *J* = 17.8 Hz, 1H), 1.52 (s, 9H).

**<sup>13</sup>C NMR** (100 MHz, CDCl<sub>3</sub>) δ 205.1, 195.9, 158.5, 156.3, 150.0, 136.0, 127.4, 122.5, 118.3, 105.1, 83.5, 75.1, 55.8, 43.3, 28.1.

**HRMS-ESI** (*m/z*): calcd for C<sub>18</sub>H<sub>20</sub>NO<sub>5</sub> [M+H]<sup>+</sup>: 330.1341; found: 330.1346.

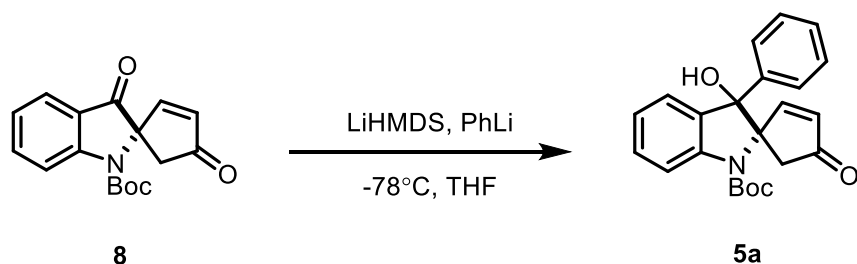

To a solution of **8** (90 mg, 0.30 mmol) in THF (3.0 mL) at -78°C under N<sub>2</sub> were added LiHMDS (0.35 mL, 0.45 mmol, 1.3 M in THF), and then PhLi (0.23 mL, 0.45 mmol, 2.0 M in dibutyl ether). The mixture was stirred for 2 h. After completion, the reaction was quenched with saturated NH<sub>4</sub>Cl solution and extracted with ethyl acetate (3×20 mL). The combined organic layers were dried over anhydrous sodium sulfate, and concentrated under reduced pressure. The crude residue was purified by silica gel chromatography, eluting with ethyl acetate/dichloromethane/petroleum ether = 1/3/2 to yield the desired product **5a** (70 mg, 80% yield) as a yellow oil. Only one epimer was generated. The stereochemistry should be analogous to that of **1a**.

**<sup>1</sup>H NMR** (400 MHz, CDCl<sub>3</sub>) δ 8.02 (d, *J* = 6.8 Hz, 1H), 7.40 (t, *J* = 7.8 Hz, 1H), 7.32 (s, 5H), 7.21 (d, *J* = 7.4 Hz, 1H), 7.11 (t, *J* = 7.4 Hz, 1H), 6.79 (d, *J* = 5.7 Hz, 1H), 5.78 (d, *J* = 5.7 Hz, 1H), 3.29 (d, *J* = 18.7 Hz, 1H), 3.20 (s, 1H), 2.91 (d, *J* = 18.7 Hz, 1H), 1.46 (s, 9H).

**<sup>13</sup>C NMR** (100 MHz, CDCl<sub>3</sub>) δ 207.4, 160.7, 151.9, 142.7, 139.5, 133.1, 132.2, 130.5, 128.3, 126.9, 124.9, 123.7, 116.3, 83.6, 82.9, 80.2, 39.9, 28.3.

**HRMS-ESI** (*m/z*): calcd for C<sub>23</sub>H<sub>22</sub>NO<sub>4</sub> [M-H]<sup>+</sup>: 376.1549; found: 376.1556.

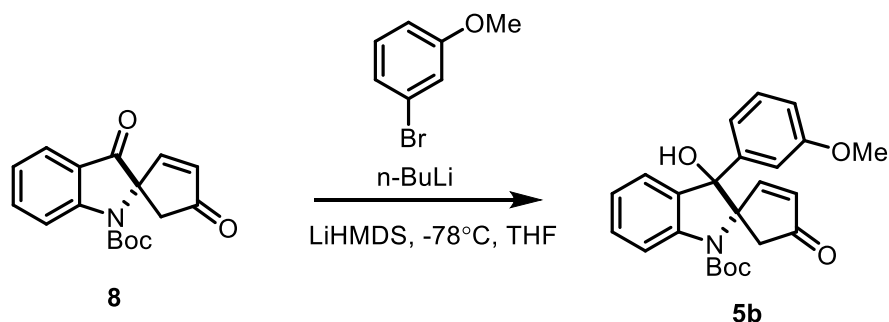

To a solution of **8** (90 mg, 0.30 mmol) in THF (3.0 mL) at -78°C under N<sub>2</sub> was added LiHMDS (0.35 mL, 0.45 mmol, 1.3 M in THF). The reaction was stirred for 1 h, and then 3-OMePhLi [made by the treatment of 1-bromo-3-methoxybenzene (0.45 mmol) in THF with n-BuLi (0.4 mmol) at -78°C] was added. The mixture was stirred at -78 °C for 2 h. The reaction was quenched with saturated ammonium chloride and extracted

with ethyl acetate (3×20 mL). The combined organic layers were dried over anhydrous sodium sulfate, and concentrated under reduced pressure. The crude residue was purified by silica gel chromatography, eluting with ethyl acetate/dichloromethane/petroleum ether = 1/3/2 to afford the desired product **5b** (86mg, 75% yield) as a colorless oil.

**<sup>1</sup>H NMR** (400 MHz, CDCl<sub>3</sub>) δ 8.05 (d, *J* = 7.0 Hz, 1H), 7.43 (t, *J* = 7.8 Hz, 1H), 7.25 (dd, *J* = 10.3, 5.3 Hz, 2H), 7.13 (t, *J* = 7.5 Hz, 1H), 6.94 (s, 1H), 6.91 – 6.79 (m, 3H), 5.84 (d, *J* = 5.6 Hz, 1H), 3.79 (s, 3H), 3.32 (d, *J* = 18.7 Hz, 1H), 2.97 (d, *J* = 18.7 Hz, 1H), 2.74 (s, 1H), 1.49 (s, 9H).

**<sup>13</sup>C NMR** (100 MHz, CDCl<sub>3</sub>) δ 207.2, 160.2, 159.5, 151.8, 142.7, 141.0, 132.9, 132.3, 130.6, 129.3, 124.8, 123.7, 119.4, 116.4, 113.4, 113.1, 83.6, 82.9, 80.2, 55.3, 39.7, 28.3.

**HRMS-ESI** (*m/z*): calcd for C<sub>24</sub>H<sub>25</sub>NO<sub>5</sub> [M-H]<sup>+</sup>: 406.1654; found: 406.1666.

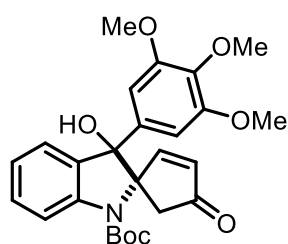

**5c**

The above compound was prepared by following the same procedure as that for **5b**. Purification by silica gel chromatography (ethyl acetate/ dichloromethane /petroleum ether = 1/3/2) afforded **5c** (70% yield) as a yellow oil.

**<sup>1</sup>H NMR** (400 MHz, CDCl<sub>3</sub>) δ 8.01 (d, *J* = 7.0 Hz, 1H), 7.40 (dd, *J* = 11.5, 4.1 Hz, 1H), 7.29 (s, 1H), 7.12 (t, *J* = 7.4 Hz, 1H), 6.84 (d, *J* = 5.7 Hz, 1H), 6.50 (s, 2H), 5.84 (d, *J* = 5.7 Hz, 1H), 3.82 (s, 3H), 3.74 (s, 6H), 3.30 (d, *J* = 18.6 Hz, 1H), 3.21 (s, 1H), 2.91 (d, *J* = 18.6 Hz, 1H), 1.46 (s, 9H).

**<sup>13</sup>C NMR** (100 MHz, CDCl<sub>3</sub>) δ 207.3, 160.6, 152.9, 151.8, 142.6, 137.8, 135.2, 132.8, 132.1, 130.6, 124.8, 123.7, 116.4, 104.4, 83.8, 82.9, 80.1, 60.8, 56.2, 40.0, 28.3.

**HRMS-ESI** (*m/z*): calcd for C<sub>26</sub>H<sub>28</sub>NO<sub>7</sub> [M-H]<sup>+</sup>: 466.1866; found: 466.1873.

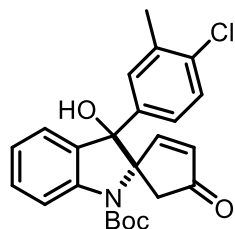

**5d**

The above compound was prepared by following the same procedure as that for **5b**. Purification by silica gel chromatography (ethyl acetate/ dichloromethane /petroleum ether = 1/3/2) afforded **5d** (70% yield) as a yellow oil.

**<sup>1</sup>H NMR** (400 MHz, CDCl<sub>3</sub>) δ 8.03 (d, *J* = 7.0 Hz, 1H), 7.46 – 7.39 (m, 1H), 7.28 (t, *J* = 4.2 Hz, 2H), 7.20 (dd, *J* = 7.4, 1.1 Hz, 1H), 7.13 (td, *J* = 7.4, 0.7 Hz, 1H), 7.04 (d, *J* = 7.2 Hz, 1H), 6.81 (d, *J* = 5.7 Hz, 1H), 5.85 (d, *J* = 5.7 Hz, 1H), 3.25 (d, *J* = 18.7 Hz, 1H), 2.98 (s, 1H), 2.94 (d, *J* = 18.7 Hz, 1H), 2.36 (s, 3H), 1.48 (s, 9H).

**<sup>13</sup>C NMR** (100 MHz, CDCl<sub>3</sub>) δ 207.1, 160.3, 151.8, 142.6, 138.0, 136.1, 134.5, 132.8, 132.5, 130.8, 129.4, 128.8, 125.9, 124.7, 123.8, 116.4, 83.3, 83.0, 80.2, 39.9, 28.3, 20.3.

**HRMS-ESI** (*m/z*): calcd for C<sub>24</sub>H<sub>23</sub>ClNO<sub>4</sub> [M-H]<sup>+</sup>: 424.1316; found: 424.1324.

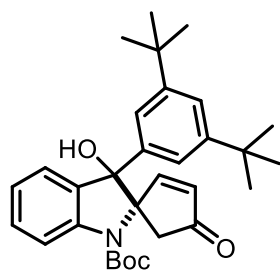

**5e**

The above compound was prepared by following the same procedure as that for **5b**. Purification by silica gel chromatography (ethyl acetate/ dichloromethane /petroleum ether = 1/3/2) afforded **5e** (43% yield) as a yellow oil.

**<sup>1</sup>H NMR** (400 MHz, CDCl<sub>3</sub>) δ 8.04 (d, *J* = 5.7 Hz, 1H), 7.41 (s, 1H), 7.26 (d, *J* = 3.0 Hz, 2H), 7.18 – 7.06 (m, 3H), 6.75 – 6.67 (m, 1H), 5.79 – 5.65 (m, 1H), 3.32 (d, *J* = 18.8 Hz, 1H), 2.97 (d, *J* = 18.7 Hz, 1H), 2.48 (s, 1H), 1.47 (s, 9H), 1.26 (s, 18H).

**<sup>13</sup>C NMR** (100 MHz, CDCl<sub>3</sub>) δ 205.4, 167.0, 151.8, 140.2, 135.9, 134.8, 128.5, 127.6, 124.8, 123.5, 121.4, 120.7, 120.6, 113.5, 85.4, 73.7, 50.0, 35.5, 31.5, 28.0.

**HRMS-ESI** (*m/z*): calcd for C<sub>31</sub>H<sub>39</sub>NO<sub>4</sub> [M+H]<sup>+</sup>: 490.2957; found: 490.2959.

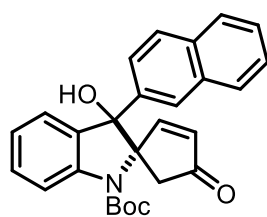

**5f**

The above compound was prepared by following the same procedure as that for **5b**. Purification by silica gel chromatography (ethyl acetate/ dichloromethane /petroleum ether = 1/3/2) afforded **5f** (72% yield) as a yellow oil.

**<sup>1</sup>H NMR** (400 MHz, CDCl<sub>3</sub>) δ 8.09 (d, *J* = 6.8 Hz, 1H), 7.88 – 7.74 (m, 4H), 7.54 – 7.48 (m, 2H), 7.48 – 7.42 (m, 1H), 7.38 (dd, *J* = 10.7, 6.6 Hz, 1H), 7.25 – 7.21 (m, 1H), 7.15 (td, *J* = 7.5, 0.9 Hz, 1H), 6.86 (d, *J* = 5.7 Hz, 1H), 5.75 (d, *J* = 5.7 Hz, 1H), 3.40 (d, *J* = 18.8 Hz, 1H), 3.01 (d, *J* = 18.7 Hz, 1H), 2.52 (s, 1H), 1.47 (s, 9H).

**<sup>13</sup>C NMR** (100 MHz, CDCl<sub>3</sub>) δ 207.0, 151.8, 136.7, 133.0, 133.0, 132.8, 132.6, 130.8, 128.5, 128.1, 127.6, 126.7, 126.5, 126.4, 124.9, 124.6, 123.8, 116.6, 83.8, 83.0, 80.4, 39.8, 28.3.

**HRMS-ESI** ( $m/z$ ): calcd for  $C_{27}H_{24}NO_4$   $[M-H]^+$ : 426.1705; found: 426.1705.

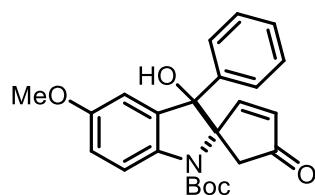

**5g**

The above compound was prepared by following the same procedure as that for **5b**. Purification by silica gel chromatography (ethyl acetate/ dichloromethane /petroleum ether = 1/3/2) afforded **5g** (71% yield) as a yellow oil.

**$^1H$  NMR** (400 MHz,  $CDCl_3$ )  $\delta$  7.94 (s, 1H), 7.40 – 7.29 (m, 5H), 6.93 (d,  $J$  = 9.0 Hz, 1H), 6.78 (d,  $J$  = 5.4 Hz, 1H), 6.74 (s, 1H), 5.79 (d,  $J$  = 5.1 Hz, 1H), 3.74 (s, 3H), 3.27 (d,  $J$  = 18.7 Hz, 1H), 2.93 (d,  $J$  = 18.1 Hz, 2H), 1.45 (s, 9H).

**$^{13}C$  NMR** (100 MHz,  $CDCl_3$ )  $\delta$  207.2, 160.3, 156.2, 151.9, 139.1, 136.2, 134.1, 132.2, 128.4, 128.3, 126.9, 117.3, 116.2, 109.9, 83.7, 82.6, 80.3, 55.8, 39.9, 28.3.

**HRMS-ESI** ( $m/z$ ): calcd for  $C_{24}H_{24}NO_5$   $[M-H]^+$ : 406.1654; found: 406.1648.

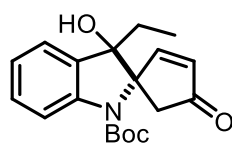

**5h**

The above compound was prepared by following the same procedure as that for **5a**. Purification by silica gel chromatography (ethyl acetate/ dichloromethane /petroleum ether = 1/3/2) afforded **5h** (65% yield) as a colorless oil.

**$^1H$  NMR** (400 MHz,  $CDCl_3$ )  $\delta$  7.83 (s, 1H), 7.54 (d,  $J$  = 5.8 Hz, 1H), 7.39 – 7.28 (m, 2H), 7.08 (t,  $J$  = 7.4 Hz, 1H), 6.26 (d,  $J$  = 5.7 Hz, 1H), 3.10 (d,  $J$  = 17.7 Hz, 1H), 2.61 (d,  $J$  = 17.7 Hz, 2H), 2.04 – 1.84 (m, 1H), 1.73 – 1.57 (m, 1H), 1.51 (s, 9H), 0.94 (t,  $J$  = 7.4 Hz, 3H).

**$^{13}C$  NMR** (100 MHz,  $CDCl_3$ )  $\delta$  206.1, 161.5, 151.9, 133.9, 133.2, 132.8, 129.7, 123.8, 123.0, 115.6, 82.7, 82.4, 79.3, 42.2, 30.7, 28.3, 7.6.

**HRMS-ESI** ( $m/z$ ): calcd for  $C_{19}H_{22}NO_4$   $[M-H]^+$ : 328.1549; found: 328.1532.

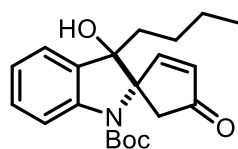

**5i**

The above compound was prepared by following the same procedure as that for **5a**. Purification by silica gel chromatography (ethyl acetate/ dichloromethane /petroleum ether = 1/3/2) afforded **5i** (70% yield) as a colorless oil.

**<sup>1</sup>H NMR** (400 MHz, CDCl<sub>3</sub>) δ 7.79 (s, 1H), 7.59 (d, *J* = 5.7 Hz, 1H), 7.33 (d, *J* = 7.4 Hz, 1H), 7.26 (d, *J* = 6.6 Hz, 1H), 7.06 (t, *J* = 7.4 Hz, 1H), 6.23 (d, *J* = 5.7 Hz, 1H), 3.40 (s, 1H), 3.06 (d, *J* = 17.5 Hz, 1H), 2.53 (d, *J* = 17.5 Hz, 1H), 1.85 (dd, *J* = 17.3, 8.4 Hz, 1H), 1.50 (s, 9H), 1.37 – 1.15 (m, 5H), 0.85 (t, *J* = 6.9 Hz, 3H).

**<sup>13</sup>C NMR** (100 MHz, CDCl<sub>3</sub>) δ 206.4, 162.4, 152.0, 140.7, 133.2, 132.9, 129.5, 124.0, 122.9, 115.4, 82.6, 82.5, 79.4, 42.5, 38.0, 28.3, 25.1, 23.0, 13.9.

**HRMS-ESI** (*m/z*): calcd for C<sub>21</sub>H<sub>26</sub>NO<sub>4</sub> [M-H]<sup>+</sup>: 356.1832; found: 356.1852.

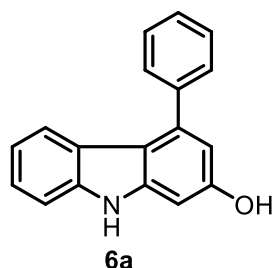

To a solution of **5a** (0.1 mmol) in CH<sub>3</sub>CN (1 mL) at RT was added TFA (0.1 mL, 10 vol%). The reaction was stirred for 12 h at RT. The mixture was concentrated under reduced pressure and purified by silica gel chromatography, eluting with ethyl acetate/petroleum ether = 1/3 to afford the desired product **6a** (83% yield) as a brown oil.

**<sup>1</sup>H NMR** (400 MHz, CDCl<sub>3</sub>) δ 8.05 (s, 1H), 7.67 – 7.59 (m, 2H), 7.58 – 7.46 (m, 3H), 7.38 (dd, *J* = 7.5, 6.1 Hz, 2H), 7.31 (dd, *J* = 7.1, 1.0 Hz, 1H), 7.02 – 6.93 (m, 1H), 6.89 (d, *J* = 2.2 Hz, 1H), 6.66 (d, *J* = 2.2 Hz, 1H).

**<sup>13</sup>C NMR** (100 MHz, CDCl<sub>3</sub>) δ 154.3, 141.3, 140.7, 139.8, 138.8, 129.0, 128.4, 127.7, 124.6, 123.1, 121.4, 119.2, 115.2, 110.2, 110.2, 95.6.

**HRMS-ESI** (*m/z*): calcd for C<sub>18</sub>H<sub>14</sub>NO [M+H]<sup>+</sup>: 260.1071; found: 260.1075.

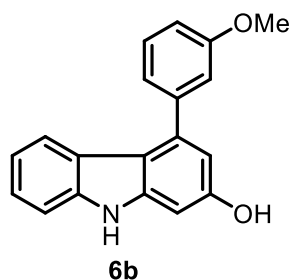

The above compound was prepared by following the same procedure as that for **6a**. Purification by silica gel chromatography (ethyl acetate/petroleum ether = 1/3) afforded **6b** (72% yield) as a colorless oil.

**<sup>1</sup>H NMR** (400 MHz, CDCl<sub>3</sub>) δ 8.05 (s, 1H), 7.46 – 7.39 (m, 2H), 7.36 (d, *J* = 8.0 Hz, 1H), 7.31 – 7.27 (m, 1H), 7.20 (d, *J* = 7.5 Hz, 1H), 7.17 – 7.14 (m, 1H), 7.03 (dd, *J* = 8.3, 2.6 Hz, 1H), 7.00 – 6.94 (m, 1H), 6.88 (d, *J* = 2.2 Hz, 1H), 6.65 (d, *J* = 2.2 Hz, 1H), 4.97 (s, 1H), 3.86 (s, 3H).

**<sup>13</sup>C NMR** (100 MHz, CDCl<sub>3</sub>) δ 159.6, 154.2, 142.0, 141.3, 139.8, 138.6, 129.5, 124.6, 123.1, 121.6, 121.5, 119.2, 115.1, 114.1, 113.8, 110.1, 110.1, 95.7, 55.4.

**HRMS-ESI** (*m/z*): calcd for C<sub>19</sub>H<sub>16</sub>NO<sub>2</sub> [M+H]<sup>+</sup>: 290.1811; found: 290.1811.

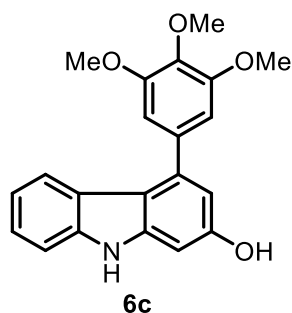

The above compound was prepared by following the same procedure as that for **6a**. Purification by silica gel chromatography (ethyl acetate/petroleum ether = 1/3) afforded **6c** (75% yield) as a brown oil.

**<sup>1</sup>H NMR** (400 MHz, CDCl<sub>3</sub>) δ 8.16 (s, 1H), 7.54 (d, *J* = 7.9 Hz, 1H), 7.38 – 7.29 (m, 2H), 7.01 (t, *J* = 7.4 Hz, 1H), 6.89 (s, 1H), 6.85 (s, 2H), 6.68 (s, 1H), 4.01 (s, 3H), 3.86 (s, 6H).

**<sup>13</sup>C NMR** (100 MHz, CDCl<sub>3</sub>) δ 154.5, 153.1, 141.4, 139.8, 138.5, 137.4, 137.4, 136.4, 124.6, 123.0, 121.5, 119.2, 110.3, 110.1, 106.1, 95.8, 61.1, 56.2

**HRMS-ESI** (*m/z*): calcd for C<sub>21</sub>H<sub>20</sub>NO<sub>4</sub> [M+H]<sup>+</sup>: 350.1392; found: 350.1389.

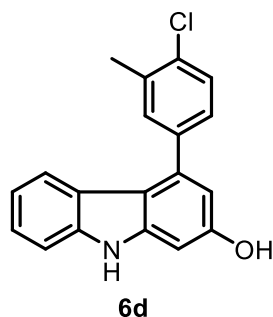

The above compound was prepared by following the same procedure as that for **6a**. Purification by silica gel chromatography (ethyl acetate/petroleum ether = 1/3) afforded **6d** (61% yield) as a yellow oil.

**<sup>1</sup>H NMR** (400 MHz, CDCl<sub>3</sub>) δ 8.04 (s, 1H), 7.51 – 7.43 (m, 2H), 7.41 – 7.32 (m, 3H), 7.32 – 7.26 (m, 1H), 7.02 – 6.94 (m, 1H), 6.86 (d, *J* = 2.2 Hz, 1H), 6.59 (d, *J* = 2.2 Hz, 1H), 2.46 (s, 3H).

**<sup>13</sup>C NMR** (100 MHz, CDCl<sub>3</sub>) δ 154.3, 141.3, 139.8, 137.6, 136.4, 136.1, 133.8, 131.5, 129.1, 127.8, 124.7, 123.0, 121.3, 119.3, 115.0, 110.2, 110.1, 95.8, 20.1.

**HRMS-ESI** (*m/z*): calcd for C<sub>19</sub>H<sub>15</sub>ClNO [M+H]<sup>+</sup>: 308.0842; found: 308.0840.

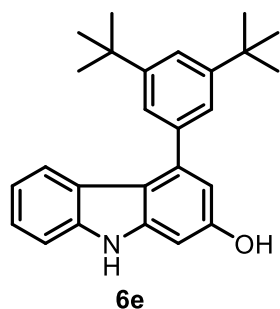

The above compound was prepared by following the same procedure as that for **6a**. Purification by silica gel chromatography (ethyl acetate/petroleum ether = 1/3) afforded **6e** (74% yield) as a brown oil.

**<sup>1</sup>H NMR** (400 MHz, CDCl<sub>3</sub>) δ 8.04 (s, 1H), 7.54 – 7.50 (m, 1H), 7.47 (d, *J* = 1.8 Hz, 2H), 7.44 (d, *J* = 8.0 Hz, 1H), 7.36 – 7.32 (m, 1H), 7.29 – 7.25 (m, 1H), 6.96 – 6.89 (m, 1H), 6.85 (d, *J* = 2.2 Hz, 1H), 6.69 (d, *J* = 2.2 Hz, 1H), 5.05 (s, 1H), 1.38 (s, 18H).

**<sup>13</sup>C NMR** (100 MHz, CDCl<sub>3</sub>) δ 154.3, 150.7, 141.4, 139.9, 139.8, 139.6, 124.5, 123.5, 123.2, 121.8, 121.4, 119.0, 115.2, 110.2, 110.1, 95.3, 60.5, 35.0, 31.6, 21.1, 14.2.

**HRMS-ESI** (*m/z*): calcd for C<sub>26</sub>H<sub>30</sub>NO [M+H]<sup>+</sup>: 372.2327; found: 372.2323.

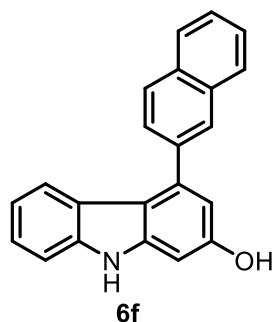

The above compound was prepared by following the same procedure as that for **6a**. Purification by silica gel chromatography (ethyl acetate/petroleum ether = 1/3) afforded **6f** (81% yield) as a brown oil.

**<sup>1</sup>H NMR** (400 MHz, CDCl<sub>3</sub>) δ 8.12 – 8.03 (m, 2H), 8.02 – 7.94 (m, 2H), 7.93 – 7.88 (m, 1H), 7.76 (dd, *J* = 8.4, 1.7 Hz, 1H), 7.60 – 7.51 (m, 2H), 7.36 (d, *J* = 8.7 Hz, 2H), 7.30 – 7.27 (m, 1H), 6.95 – 6.86 (m, 2H), 6.73 (d, *J* = 2.1 Hz, 1H), 5.08 (s, 1H).

**<sup>13</sup>C NMR** (100 MHz, CDCl<sub>3</sub>) δ 154.4, 141.4, 139.9, 138.6, 138.2, 133.5, 132.9, 128.2, 127.9, 127.8, 127.7, 127.5, 126.3, 126.1, 124.6, 123.1, 121.5, 119.3, 115.3, 110.5, 110.2, 95.8.

**HRMS-ESI** (*m/z*): calcd for C<sub>22</sub>H<sub>16</sub>NO [M+H]<sup>+</sup>: 310.1232; found: 310.1231.

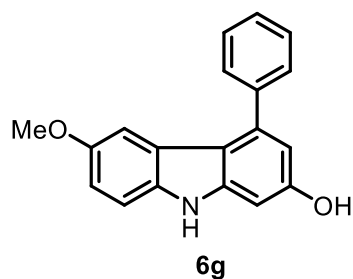

The above compound was prepared by following the same procedure as that for **6a**. Purification by silica gel chromatography (ethyl acetate/petroleum ether = 1/3) afforded **6g** (72% yield) as a colorless oil.

**<sup>1</sup>H NMR** (400 MHz, CDCl<sub>3</sub>) δ 7.91 (s, 1H), 7.62 – 7.57 (m, 2H), 7.54 – 7.43 (m, 3H), 7.22 (d, *J* = 8.7 Hz, 1H), 6.90 (d, *J* = 8.6 Hz, 1H), 6.83 (s, 2H), 6.61 (s, 1H), 3.61 (s, 3H).

**<sup>13</sup>C NMR** (100 MHz, CDCl<sub>3</sub>) δ 154.3, 153.3, 142.1, 140.5, 138.7, 134.6, 129.1, 128.3, 127.8, 123.6, 115.1, 113.2, 110.7, 109.8, 104.8, 100.0, 95.7, 55.6.

**HRMS-ESI** (*m/z*): calcd for C<sub>19</sub>H<sub>16</sub>NO<sub>2</sub> [M+H]<sup>+</sup>: 290.1181; found: 290.1184.

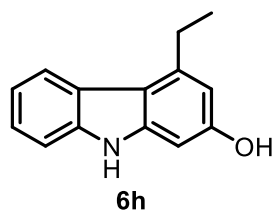

The above compound was prepared by following the same procedure as that for **6a**. Purification by silica gel chromatography (ethyl acetate/petroleum ether = 1/3) afforded **6h** (46% yield) as a light yellow solid.

**<sup>1</sup>H NMR** (400 MHz, CDCl<sub>3</sub>) δ 8.01 – 7.86 (m, 2H), 7.35 – 7.23 (m, 2H), 7.15 (t, *J* = 7.4 Hz, 1H), 6.65 (s, 1H), 6.51 (s, 1H), 3.12 (q, *J* = 7.4 Hz, 2H), 1.36 (t, *J* = 7.5 Hz, 3H).

**<sup>13</sup>C NMR** (100 MHz, CDCl<sub>3</sub>) δ 153.6, 140.1, 140.0, 138.5, 123.0, 122.4, 120.6, 118.5, 114.3, 109.1, 107.1, 93.1, 26.1, 12.8.

**HRMS-ESI** (*m/z*): calcd for C<sub>14</sub>H<sub>14</sub>NO [M+H]<sup>+</sup>: 212.1075; found: 212.1070.

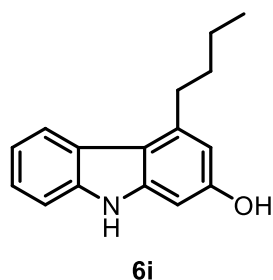

The above compound was prepared by following the same procedure as that for **6a**. Purification by silica gel chromatography (ethyl acetate/petroleum ether = 1/3) afforded **6i** (51% yield) as a white solid.

**<sup>1</sup>H NMR** (400 MHz, CDCl<sub>3</sub>) δ 7.99 (d, *J* = 7.9 Hz, 1H), 7.95 (s, 1H), 7.41 – 7.31 (m, 2H), 7.25 – 7.20 (m, 1H), 6.71 (d, *J* = 2.2 Hz, 1H), 6.55 (d, *J* = 2.1 Hz, 1H), 4.81 (s, 1H), 3.19 – 3.09 (m, 2H), 1.90 – 1.76 (m, 2H), 1.60 – 1.45 (m, 2H), 1.00 (t, *J* = 7.3 Hz, 3H).

**<sup>13</sup>C NMR** (100 MHz, CDCl<sub>3</sub>) δ 154.4, 141.2, 139.8, 139.7, 139.6, 138.5, 124.1, 121.6, 119.6, 110.2, 109.2, 94.2, 34.0, 31.7, 22.8, 14.1.

**HRMS-ESI** (*m/z*): calcd for C<sub>16</sub>H<sub>18</sub>NO [M+H]<sup>+</sup>: 240.1388; found: 240.1386.



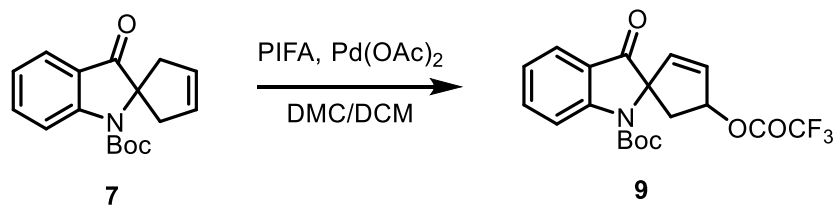

The compound **7** (0.3 mmol) was dissolved in dimethyl carbonate: DCM = 1/10, followed by the addition of PIFA (0.45 mmol) and palladium acetate (0.015 mmol, 5 mol %). The reaction mixture was stirred for overnight at RT. The crude products were purified by silica gel chromatography, eluting with ethyl acetate/petroleum ether = 1/10 to afford the desired product **9** (51% yield) as a white solid. Only one epimer was generated. The relative stereochemistry was not assigned.

<sup>1</sup>H NMR (400 MHz, Chloroform-*d*)  $\delta$  8.27 (d,  $J$  = 8.5 Hz, 1H), 7.78 – 7.63 (m, 2H), 7.16 (t,  $J$  = 7.4 Hz, 1H), 6.30 – 6.12 (m, 2H), 5.88 (dd,  $J$  = 5.5, 1.3 Hz, 1H), 2.81 (dd,  $J$  = 13.4, 7.6 Hz, 1H), 2.62 (dd,  $J$  = 13.4, 5.7 Hz, 1H), 1.53 (s, 9H).

<sup>13</sup>C NMR (100 MHz, Chloroform-*d*)  $\delta$  198.1, 156.9 (q,  $^2J_{C-F}$  = 42.4 Hz), 153.3, 150.4, 137.8, 136.7, 131.7, 124.5, 123.5, 121.2, 117.0, 114.4 (q,  $^1J_{C-F}$  = 285.9 Hz), 83.5, 81.7, 79.0, 39.5, 28.1.

<sup>19</sup>F NMR (376 MHz, Chloroform-*d*)  $\delta$  -75.0.

HRMS-ESI ( $m/z$ ): calcd for C<sub>19</sub>H<sub>19</sub>F<sub>3</sub>NO<sub>5</sub> [M+H]<sup>+</sup>: 398.1215; found: 398.122.

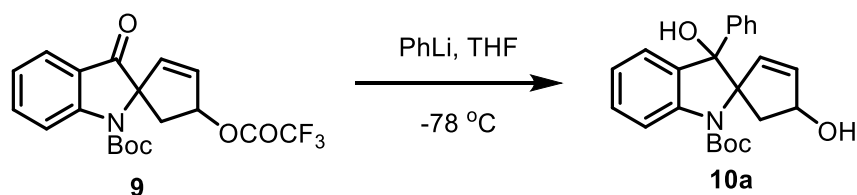

To a solution of **9** (44 mg, 0.1 mmol) in THF (1.0 mL) at -78 °C was added PhLi (0.19 mL, 0.3 mmol, 1.6 M in dibutyl ether). The reaction was stirred at -78 °C for 2 h. The reaction was then quenched with brine and extracted with ethyl acetate (3×3 mL). The combined organic layers were dried over anhydrous sodium sulfate, and concentrated under reduced pressure. The crude residue was purified by silica gel chromatography, eluting with ethyl acetate/petroleum ether = 1/2 to afford the desired product **10a** (36 mg, 95%) as a white solid. Only one epimer was generated. The relative stereochemistry was not assigned.

<sup>1</sup>H NMR (400 MHz, Chloroform-*d*)  $\delta$  7.69 (d,  $J$  = 8.3 Hz, 1H), 7.42 – 7.26 (m, 6H), 7.15 (dd,  $J$  = 7.5, 1.3 Hz, 1H), 7.06 (td,  $J$  = 7.4, 1.0 Hz, 1H), 5.66 (d,  $J$  = 5.5 Hz, 1H), 5.26 (d,  $J$  = 5.5 Hz, 1H), 4.60 (s, 1H), 4.43 (d,  $J$  = 7.8 Hz, 1H), 3.16 (dd,  $J$  = 16.0, 7.8 Hz, 1H), 2.41 (d,  $J$  = 16.0 Hz, 1H), 2.35 (s, 1H), 1.60 (s, 9H).

<sup>13</sup>C NMR (100 MHz, Chloroform-*d*)  $\delta$  152.0, 142.3, 139.0, 136.5, 134.4, 132.1, 130.1, 127.8, 127.7, 127.6, 125.1, 123.2, 116.3, 86.4, 83.3, 82.9, 75.9, 28.5.

HRMS-ESI ( $m/z$ ): calcd for C<sub>23</sub>H<sub>26</sub>NO<sub>4</sub> [M+H]<sup>+</sup>: 380.1862; found: 380.1841.

## Computational methods and Results

### (1) Computational methods

The calculations were performed with the Gaussian 16 program package<sup>[1]</sup>. The geometry optimizations of the substrates, products and transition states were performed using the M062X functional<sup>[2]</sup> with Pople's 6-31G(d) basis set<sup>[3]</sup> for all atoms. Higher level of single point electronic energies for those structures were calculated at M062X/def2-TZVP<sup>[4]</sup> level. The solvent effect in CH<sub>3</sub>CN and DCE was evaluated with the SMD method<sup>[5]</sup>. The vibrational harmonic frequencies and thermal corrections were calculated using the same level as the optimization; the former confirmed the optimized geometrical structures are the minima of PES, and transition states, the first order saddle points. Intrinsic reaction coordinate (IRC) calculations were performed for the identified

transition states to confirm the reaction path proceeding in both directions (reactant and product), in which the Hessian was recomputed every five predictor steps with a step size along the reaction path of 0.05 Bohr<sup>[6]</sup>. All energies mentioned are solvated Gibbs free energies in CH<sub>3</sub>CN. To determine the catalytic form of TFA, we calculated the Gibbs free energy change of protonation reaction at the (SMD)-M062X/6-31G(d) level, in CH<sub>3</sub>CN solvent.

## (2) Determine the catalytic form of the acid

Since TFA is a relatively strong acid and the dielectric constant of the solvent CH<sub>3</sub>CN is also relatively large. Therefore, it is necessary to determine whether TFA completely protonated the imine substrate. We calculated the Gibbs free energy change of protonation reaction.

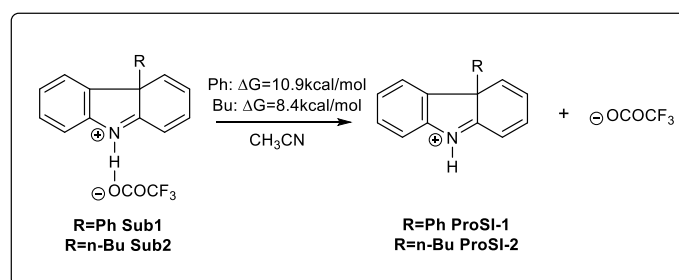

Since the  $\Delta G$  is positive, TFA should be in the form of hydrogen bonded complex.

| Species                             | Trifluoroacetat | Sub1                 | ProSI-1  | Sub2     | ProSI-2  |
|-------------------------------------|-----------------|----------------------|----------|----------|----------|
|                                     | e               |                      |          |          |          |
| <b>Optimization Level</b>           |                 | (SMD)-M062X/6-31G(d) |          |          |          |
| <b>Electronic Energy Level</b>      |                 | (SMD)-M062X/6-31G(d) |          |          |          |
| <b>Electronic Energy (kcal/mol)</b> | -330163.09      | -                    | -        | -        | -        |
|                                     |                 | 799945.7             | 469763.3 | 753649.5 | 423467.7 |
|                                     |                 | 3                    | 9        | 6        | 0        |
| <b>Imaginaries</b>                  | 0               | 0                    | 0        | 0        | 0        |
| <b>G<sub>sol</sub>(kcal/mol)</b>    | -330164.57      | -                    | -        | -        | -        |

|   |          |          |          |          |
|---|----------|----------|----------|----------|
| ) | 799793.3 | 469617.9 | 753475.1 | 423302.2 |
|   | 6        | 1        | 9        | 1        |

(3) Geometries and original energies

| Specics                             | Sub1                 | Sub2       |
|-------------------------------------|----------------------|------------|
| <b>Optimization Level</b>           | (SMD)-M062X/6-31G(d) |            |
| <b>Electronic Energy Level</b>      | (SMD)-M062X/def2TZVP |            |
| <b>Electronic Energy (kcal/mol)</b> | -800269.47           | -753957.91 |
| <b>Imaginaries</b>                  | 0                    | 0          |
| <b>G Correction (kcal/mol)</b>      | 152.37               | 174.37     |
| <b>G<sub>sol</sub>(kcal/mol)</b>    | -800117.10           | -753783.54 |

| Specics                             | TS1                  | TS2        |
|-------------------------------------|----------------------|------------|
| <b>Optimization Level</b>           | (SMD)-M062X/6-31G(d) |            |
| <b>Electronic Energy Level</b>      | (SMD)-M062X/def2TZVP |            |
| <b>Electronic Energy (kcal/mol)</b> | -800251.79           | -753936.35 |
| <b>Imaginaries</b>                  | 1                    | 1          |
| <b>G Correction (kcal/mol)</b>      | 152.79               | 171.91     |
| <b>G<sub>sol</sub>(kcal/mol)</b>    | -800099.00           | -753764.44 |

| Specics                             | TS3                  | TS4        |
|-------------------------------------|----------------------|------------|
| <b>Optimization Level</b>           | (SMD)-M062X/6-31G(d) |            |
| <b>Electronic Energy Level</b>      | (SMD)-M062X/def2TZVP |            |
| <b>Electronic Energy (kcal/mol)</b> | -800246.17           | -753935.39 |
| <b>Imaginaries</b>                  | 1                    | 1          |
| <b>G Correction (kcal/mol)</b>      | 152.24               | 172.36     |
| <b>G<sub>sol</sub>(kcal/mol)</b>    | -800093.93           | -753763.03 |

| Specics                             | Pro1                 | Pro2       |
|-------------------------------------|----------------------|------------|
| <b>Optimization Level</b>           | (SMD)-M062X/6-31G(d) |            |
| <b>Electronic Energy Level</b>      | (SMD)-M062X/def2TZVP |            |
| <b>Electronic Energy (kcal/mol)</b> | -800274.20           | -753957.89 |
| <b>Imaginaries</b>                  | 0                    | 0          |
| <b>G Correction (kcal/mol)</b>      | 151.56               | 173.00     |
| <b>G<sub>sol</sub>(kcal/mol)</b>    | -800122.64           | -753784.89 |

| Specics                             | Pro3                 | Pro4       |
|-------------------------------------|----------------------|------------|
| <b>Optimization Level</b>           | (SMD)-M062X/6-31G(d) |            |
| <b>Electronic Energy Level</b>      | (SMD)-M062X/def2TZVP |            |
| <b>Electronic Energy (kcal/mol)</b> | -800256.41           | -753946.02 |

| <b>Imaginary</b>                 | <b>0</b>   | <b>0</b>   |
|----------------------------------|------------|------------|
| <b>G Correction (kcal/mol)</b>   | 154.39     | 176.55     |
| <b>G<sub>sol</sub>(kcal/mol)</b> | -800102.02 | -753769.47 |

---

Sub1

|   |           |           |           |
|---|-----------|-----------|-----------|
| C | 0.221338  | 1.437642  | -0.412928 |
| C | 1.582917  | 1.446469  | -0.728686 |
| C | 2.279336  | 2.640950  | -0.757990 |
| C | 1.572564  | 3.820100  | -0.494092 |
| C | 0.212537  | 3.790899  | -0.178056 |
| C | -0.495400 | 2.587313  | -0.124631 |
| H | 3.342315  | 2.664746  | -0.979289 |
| H | 2.092002  | 4.772317  | -0.531290 |
| H | -0.306829 | 4.720502  | 0.032341  |
| H | -1.548923 | 2.532646  | 0.131395  |
| C | 2.034673  | 0.007306  | -0.842978 |
| N | -0.259057 | 0.102198  | -0.461124 |
| C | 0.701522  | -0.705995 | -0.803600 |
| C | 2.838108  | -0.424540 | -2.037518 |
| H | 3.679551  | 0.197390  | -2.329548 |
| C | 0.576256  | -2.066808 | -1.245739 |
| H | -0.284928 | -2.665444 | -0.970760 |
| C | 2.579015  | -1.601471 | -2.626170 |
| H | 3.190385  | -1.954174 | -3.450140 |
| C | 1.491752  | -2.465709 | -2.160232 |
| H | 1.398306  | -3.449739 | -2.610108 |
| C | 2.774512  | -0.418887 | 0.479860  |
| C | 2.500473  | 0.244473  | 1.680925  |
| C | 3.661911  | -1.497593 | 0.490283  |
| C | 3.117009  | -0.155638 | 2.863915  |
| H | 1.810333  | 1.081193  | 1.707315  |
| C | 4.279760  | -1.890985 | 1.675995  |
| H | 3.885112  | -2.036331 | -0.423530 |
| C | 4.012455  | -1.222004 | 2.866749  |
| H | 2.893813  | 0.375088  | 3.784427  |
| H | 4.973299  | -2.726292 | 1.661110  |
| H | 4.496696  | -1.528678 | 3.788762  |
| H | -1.319503 | -0.221602 | -0.349610 |
| O | -2.648363 | -0.813932 | -0.257539 |
| C | -3.480817 | -0.004606 | 0.244514  |
| O | -3.333868 | 1.158805  | 0.609545  |

|   |           |           |           |
|---|-----------|-----------|-----------|
| C | -4.889605 | -0.627905 | 0.383647  |
| F | -4.849874 | -1.771393 | 1.086590  |
| F | -5.755095 | 0.187319  | 0.993663  |
| F | -5.400842 | -0.926377 | -0.823460 |

Sub2

|   |           |           |           |
|---|-----------|-----------|-----------|
| C | -0.692383 | -0.939882 | -0.954782 |
| C | -2.061037 | -0.708269 | -1.134316 |
| C | -2.887306 | -1.737671 | -1.552792 |
| C | -2.305614 | -2.982680 | -1.814528 |
| C | -0.936148 | -3.193968 | -1.629494 |
| C | -0.096869 | -2.170595 | -1.185811 |
| H | -3.954808 | -1.582915 | -1.680736 |
| H | -2.928884 | -3.799520 | -2.164511 |
| H | -0.515682 | -4.174068 | -1.831751 |
| H | 0.967026  | -2.308917 | -1.019142 |
| C | -2.342907 | 0.684443  | -0.637562 |
| N | -0.073749 | 0.257965  | -0.523876 |
| C | -0.959826 | 1.215395  | -0.433291 |
| C | -3.223292 | 1.655013  | -1.357127 |
| H | -4.156441 | 1.283342  | -1.771316 |
| C | -0.723316 | 2.612856  | -0.248549 |
| H | 0.230884  | 2.972042  | 0.120441  |
| C | -2.922929 | 2.965591  | -1.330196 |
| H | -3.595530 | 3.697592  | -1.763987 |
| C | -1.694217 | 3.444661  | -0.709562 |
| H | -1.534449 | 4.517953  | -0.662128 |
| H | 0.994316  | 0.412676  | -0.365323 |
| C | -3.013731 | 0.555105  | 0.811366  |
| H | -4.027573 | 0.184049  | 0.625696  |
| H | -3.093594 | 1.571051  | 1.212694  |
| C | -2.300359 | -0.351438 | 1.809051  |
| H | -1.260201 | -0.028907 | 1.948439  |
| H | -2.272425 | -1.381706 | 1.434880  |
| C | -3.013402 | -0.328827 | 3.162751  |
| H | -3.035855 | 0.699703  | 3.543928  |
| H | -4.057915 | -0.636164 | 3.026073  |
| C | -2.336085 | -1.241707 | 4.180581  |
| H | -1.297030 | -0.937363 | 4.347866  |
| H | -2.853611 | -1.215816 | 5.144531  |
| H | -2.327932 | -2.279669 | 3.830335  |
| O | 2.434343  | 0.827883  | -0.098190 |

|   |          |           |           |
|---|----------|-----------|-----------|
| C | 3.188321 | -0.183272 | -0.072230 |
| O | 2.934460 | -1.370992 | -0.267924 |
| C | 4.655256 | 0.187381  | 0.254752  |
| F | 4.741042 | 0.848334  | 1.421888  |
| F | 5.169289 | 0.994086  | -0.690367 |
| F | 5.454178 | -0.880980 | 0.342978  |

TS1

|   |           |           |           |
|---|-----------|-----------|-----------|
| C | 0.156570  | 1.380957  | -0.401426 |
| C | 1.522376  | 1.393472  | -0.752609 |
| C | 2.224226  | 2.598771  | -0.804851 |
| C | 1.549337  | 3.770197  | -0.487101 |
| C | 0.194254  | 3.739847  | -0.114829 |
| C | -0.524980 | 2.553423  | -0.068041 |
| H | 3.265141  | 2.627731  | -1.111213 |
| H | 2.071316  | 4.720171  | -0.533559 |
| H | -0.307003 | 4.671118  | 0.131962  |
| H | -1.574419 | 2.508795  | 0.206387  |
| C | 1.887910  | -0.007187 | -0.986575 |
| N | -0.349792 | 0.094121  | -0.482913 |
| C | 0.617537  | -0.741277 | -0.934760 |
| C | 3.030304  | -0.680546 | -1.555956 |
| H | 3.907116  | -0.105141 | -1.830407 |
| C | 0.511859  | -2.030512 | -1.408581 |
| H | -0.443598 | -2.544071 | -1.396825 |
| C | 2.866817  | -1.997653 | -2.074358 |
| H | 3.717883  | -2.476428 | -2.543624 |
| C | 1.653466  | -2.640019 | -1.978182 |
| H | 1.552008  | -3.642833 | -2.381327 |
| C | 3.056786  | -0.606007 | 0.239529  |
| C | 2.657956  | -1.677079 | 1.046011  |
| C | 4.025842  | 0.300676  | 0.682429  |
| C | 3.235347  | -1.830266 | 2.298140  |
| H | 1.906185  | -2.382453 | 0.710077  |
| C | 4.597895  | 0.129305  | 1.937218  |
| H | 4.349859  | 1.118941  | 0.049230  |
| C | 4.202167  | -0.930197 | 2.750133  |
| H | 2.919470  | -2.656112 | 2.927049  |
| H | 5.357834  | 0.827204  | 2.272676  |
| H | 4.643946  | -1.056640 | 3.733246  |
| H | -1.363308 | -0.178767 | -0.406278 |
| O | -2.900221 | -0.810378 | -0.354124 |
| C | -3.633171 | 0.019995  | 0.237487  |
| O | -3.383127 | 1.145922  | 0.676415  |

|   |           |           |           |
|---|-----------|-----------|-----------|
| C | -5.083520 | -0.496706 | 0.420434  |
| F | -5.105619 | -1.653906 | 1.106541  |
| F | -5.872196 | 0.364194  | 1.074813  |
| F | -5.664515 | -0.740277 | -0.769133 |

TS2

|   |           |           |           |
|---|-----------|-----------|-----------|
| C | 0.148360  | 1.186216  | -0.569891 |
| C | 1.510583  | 1.104343  | -0.934755 |
| C | 2.275058  | 2.260404  | -1.112560 |
| C | 1.654203  | 3.488870  | -0.936348 |
| C | 0.293838  | 3.558575  | -0.582438 |
| C | -0.480473 | 2.421382  | -0.392770 |
| H | 3.323248  | 2.193771  | -1.389954 |
| H | 2.218332  | 4.405217  | -1.075018 |
| H | -0.166324 | 4.534093  | -0.454395 |
| H | -1.530194 | 2.462055  | -0.119187 |
| C | 1.816595  | -0.310412 | -0.996671 |
| N | -0.387225 | -0.084733 | -0.443004 |
| C | 0.569616  | -1.005254 | -0.745499 |
| C | 2.966021  | -1.062065 | -1.361544 |
| H | 3.867651  | -0.541006 | -1.664777 |
| C | 0.488256  | -2.378818 | -0.882762 |
| H | -0.447441 | -2.898112 | -0.703555 |
| C | 2.836775  | -2.455523 | -1.569747 |
| H | 3.698028  | -3.020544 | -1.906366 |
| C | 1.631006  | -3.082921 | -1.310759 |
| H | 1.550746  | -4.156468 | -1.449866 |
| H | -1.391329 | -0.321465 | -0.250631 |
| C | 2.971132  | -0.787001 | 0.617181  |
| H | 2.718879  | -1.816310 | 0.864209  |
| H | 2.307351  | -0.083446 | 1.117794  |
| C | 4.414285  | -0.384939 | 0.779396  |
| H | 4.586363  | 0.590614  | 0.309416  |
| H | 5.078693  | -1.116682 | 0.310001  |
| C | 4.717717  | -0.282514 | 2.282412  |
| H | 4.064101  | 0.473217  | 2.732660  |
| H | 4.487117  | -1.237949 | 2.767778  |
| C | 6.180583  | 0.081552  | 2.521069  |
| H | 6.424246  | 1.042713  | 2.056347  |
| H | 6.392769  | 0.158999  | 3.591517  |
| H | 6.846979  | -0.677191 | 2.097813  |
| O | -2.934838 | -0.911985 | 0.035497  |

|   |           |           |           |
|---|-----------|-----------|-----------|
| C | -3.683370 | 0.060592  | 0.297779  |
| O | -3.445938 | 1.270609  | 0.352463  |
| C | -5.138717 | -0.378664 | 0.603259  |
| F | -5.184172 | -1.191957 | 1.675139  |
| F | -5.668058 | -1.064881 | -0.426096 |
| F | -5.959018 | 0.649025  | 0.854451  |

TS3

|   |           |           |           |
|---|-----------|-----------|-----------|
| C | 0.442386  | 1.614362  | -0.163798 |
| C | 1.847510  | 1.719197  | -0.300851 |
| C | 2.518751  | 2.895865  | 0.058196  |
| C | 1.767897  | 3.946995  | 0.550614  |
| C | 0.368482  | 3.824981  | 0.700468  |
| C | -0.316266 | 2.671030  | 0.361182  |
| H | 3.596002  | 2.972666  | -0.052912 |
| H | 2.253798  | 4.875265  | 0.831943  |
| H | -0.189030 | 4.667392  | 1.099486  |
| H | -1.387913 | 2.559017  | 0.489664  |
| C | 2.293331  | 0.466420  | -0.856794 |
| N | 0.017993  | 0.376356  | -0.586546 |
| C | 1.112633  | -0.366089 | -0.969093 |
| C | 3.465682  | 0.145875  | -1.626459 |
| H | 4.348376  | 0.770034  | -1.541198 |
| C | 1.082357  | -1.463781 | -1.922773 |
| H | 0.171759  | -2.042363 | -2.035041 |
| C | 3.393959  | -0.889576 | -2.502498 |
| H | 4.248892  | -1.123362 | -3.129088 |
| C | 2.197813  | -1.696912 | -2.651271 |
| H | 2.207445  | -2.500259 | -3.380599 |
| C | 2.014915  | -0.955174 | 0.544761  |
| C | 1.459856  | -0.537994 | 1.746664  |
| C | 2.890069  | -2.028394 | 0.474187  |
| C | 1.785718  | -1.232718 | 2.909264  |
| H | 0.774169  | 0.299713  | 1.805505  |
| C | 3.205418  | -2.712693 | 1.646236  |
| H | 3.331118  | -2.348680 | -0.462344 |
| C | 2.658057  | -2.317485 | 2.864130  |
| H | 1.348386  | -0.915507 | 3.850382  |
| H | 3.885579  | -3.556827 | 1.595570  |
| H | 2.910597  | -2.851960 | 3.774281  |
| H | -0.964096 | -0.006225 | -0.545586 |
| O | -2.440678 | -0.743566 | -0.617399 |
| C | -3.265207 | -0.016954 | -0.009603 |
| O | -3.107059 | 1.046112  | 0.596377  |



|   |           |           |           |
|---|-----------|-----------|-----------|
| C | -4.708469 | -0.579026 | -0.069463 |
| F | -4.767387 | -1.836244 | 0.404688  |
| F | -5.585855 | 0.148934  | 0.631637  |
| F | -5.154366 | -0.621729 | -1.339064 |

TS4

|   |           |           |           |
|---|-----------|-----------|-----------|
| C | -0.687955 | -0.844974 | -1.053672 |
| C | -2.076797 | -0.629407 | -1.215640 |
| C | -2.918264 | -1.678111 | -1.608269 |
| C | -2.350867 | -2.918632 | -1.844982 |
| C | -0.964577 | -3.119630 | -1.678654 |
| C | -0.113372 | -2.102168 | -1.277644 |
| H | -3.985840 | -1.515027 | -1.724246 |
| H | -2.975296 | -3.749064 | -2.157712 |
| H | -0.551732 | -4.106246 | -1.868280 |
| H | 0.953103  | -2.245188 | -1.135272 |
| C | -2.315396 | 0.748119  | -0.864466 |
| N | -0.078195 | 0.324020  | -0.644782 |
| C | -1.031771 | 1.294538  | -0.517168 |
| C | -3.428578 | 1.620278  | -1.067722 |
| H | -4.389841 | 1.208926  | -1.357530 |
| C | -0.851841 | 2.714122  | -0.398688 |
| H | 0.128475  | 3.118020  | -0.168701 |
| C | -3.234495 | 2.963289  | -0.917116 |
| H | -4.060575 | 3.650101  | -1.069638 |
| C | -1.946169 | 3.505878  | -0.580255 |
| H | -1.845855 | 4.582413  | -0.487576 |
| H | 0.937834  | 0.462148  | -0.409930 |
| C | -1.981785 | 0.916865  | 1.299181  |
| H | -2.715604 | 1.717231  | 1.358004  |
| H | -1.016182 | 1.188495  | 1.721019  |
| C | -2.424961 | -0.449811 | 1.698328  |
| H | -1.699141 | -1.204994 | 1.374598  |
| H | -3.400692 | -0.695874 | 1.268810  |
| C | -2.503492 | -0.477949 | 3.239665  |
| H | -1.514271 | -0.259702 | 3.656970  |
| H | -3.182170 | 0.308946  | 3.587279  |
| C | -2.990418 | -1.839131 | 3.729176  |
| H | -2.313591 | -2.635666 | 3.403088  |
| H | -3.041431 | -1.862274 | 4.821865  |
| H | -3.988592 | -2.061491 | 3.338146  |
| O | 2.486956  | 0.886170  | 0.024343  |

|   |          |           |           |
|---|----------|-----------|-----------|
| C | 3.212922 | -0.130250 | -0.104342 |
| O | 2.938692 | -1.274103 | -0.477126 |
| C | 4.688374 | 0.142932  | 0.285838  |
| F | 4.785974 | 0.525985  | 1.572650  |
| F | 5.213052 | 1.136080  | -0.455089 |
| F | 5.480999 | -0.924416 | 0.131710  |

Pro1

|   |           |           |           |
|---|-----------|-----------|-----------|
| C | -0.219542 | 1.150700  | -0.386172 |
| C | 1.195231  | 1.048110  | -0.613605 |
| C | 1.989352  | 2.226699  | -0.677710 |
| C | 1.367077  | 3.435311  | -0.519958 |
| C | -0.042619 | 3.515623  | -0.297155 |
| C | -0.847740 | 2.404653  | -0.227280 |
| H | 3.059177  | 2.155463  | -0.849017 |
| H | 1.942193  | 4.354227  | -0.562975 |
| H | -0.489607 | 4.498401  | -0.178636 |
| H | -1.918706 | 2.453951  | -0.058375 |
| C | 1.476447  | -0.316933 | -0.719806 |
| N | -0.770800 | -0.084090 | -0.352312 |
| C | 0.237411  | -1.002255 | -0.547142 |
| C | 2.733992  | -1.068626 | -0.957306 |
| H | 3.044080  | -0.853935 | -1.997972 |
| C | 0.166778  | -2.374963 | -0.540051 |
| H | -0.784896 | -2.875168 | -0.380697 |
| C | 2.554679  | -2.550567 | -0.915971 |
| H | 3.452123  | -3.145243 | -1.061521 |
| C | 1.352892  | -3.151680 | -0.732257 |
| H | 1.270520  | -4.232453 | -0.721715 |
| H | -1.787763 | -0.329063 | -0.194598 |
| O | -3.306258 | -0.896987 | 0.036466  |
| C | -4.087601 | 0.077632  | 0.172177  |
| O | -3.870771 | 1.291622  | 0.152214  |
| C | -5.555128 | -0.368025 | 0.395038  |
| F | -5.665543 | -1.156897 | 1.479122  |
| F | -6.008757 | -1.081152 | -0.652260 |
| F | -6.395643 | 0.658812  | 0.566926  |
| C | 3.883949  | -0.622375 | -0.053850 |
| C | 5.068036  | -0.123838 | -0.594601 |
| C | 3.743086  | -0.726450 | 1.332753  |
| C | 6.105999  | 0.275384  | 0.247611  |
| H | 5.177059  | -0.043560 | -1.672974 |
| C | 4.780236  | -0.329082 | 2.170809  |
| H | 2.818132  | -1.117167 | 1.751628  |

|   |          |           |           |
|---|----------|-----------|-----------|
| C | 5.963858 | 0.173699  | 1.629146  |
| H | 7.024077 | 0.667184  | -0.179638 |
| H | 4.664686 | -0.411754 | 3.247289  |
| H | 6.771878 | 0.485691  | 2.283819  |

Pro2

|   |           |           |           |
|---|-----------|-----------|-----------|
| C | -0.230507 | 1.315587  | -0.284076 |
| C | 1.188414  | 1.344364  | -0.499448 |
| C | 1.871460  | 2.590891  | -0.531662 |
| C | 1.144630  | 3.735886  | -0.340250 |
| C | -0.264969 | 3.683681  | -0.119289 |
| C | -0.967792 | 2.502558  | -0.090091 |
| H | 2.941580  | 2.623674  | -0.712818 |
| H | 1.635809  | 4.703030  | -0.360064 |
| H | -0.799027 | 4.618250  | 0.026070  |
| H | -2.039606 | 2.451044  | 0.072920  |
| C | 1.590939  | 0.011080  | -0.655349 |
| N | -0.672867 | 0.036198  | -0.307018 |
| C | 0.411520  | -0.781274 | -0.535793 |
| C | 2.914712  | -0.621867 | -0.838594 |
| H | 3.425737  | -0.178081 | -1.707831 |
| C | 0.447769  | -2.150307 | -0.664648 |
| H | -0.464018 | -2.734753 | -0.572988 |
| C | 2.841521  | -2.092041 | -1.036978 |
| H | 3.773867  | -2.607988 | -1.246088 |
| C | 1.688974  | -2.803843 | -0.933491 |
| H | 1.690251  | -3.880830 | -1.056785 |
| H | -1.666410 | -0.301031 | -0.188022 |
| C | 3.834007  | -0.300049 | 0.396557  |
| H | 3.380638  | -0.751408 | 1.285977  |
| H | 3.809515  | 0.786611  | 0.531304  |
| C | 5.277320  | -0.765151 | 0.231302  |
| H | 5.670212  | -0.408765 | -0.730603 |
| H | 5.326880  | -1.860474 | 0.210428  |
| C | 6.164144  | -0.250542 | 1.365323  |
| H | 6.133735  | 0.846293  | 1.377886  |
| H | 5.752518  | -0.586143 | 2.325752  |
| C | 7.607902  | -0.725207 | 1.229341  |
| H | 8.044775  | -0.381544 | 0.285141  |
| H | 8.231178  | -0.346617 | 2.045398  |
| H | 7.662874  | -1.819340 | 1.243859  |
| O | -3.139663 | -1.014631 | -0.019590 |

|   |           |           |           |
|---|-----------|-----------|-----------|
| C | -3.989819 | -0.122362 | 0.223710  |
| O | -3.867247 | 1.101289  | 0.320814  |
| C | -5.414457 | -0.700808 | 0.419375  |
| F | -5.438246 | -1.618440 | 1.402563  |
| F | -5.842300 | -1.317511 | -0.697928 |
| F | -6.323872 | 0.231268  | 0.728050  |

Pro3

|   |           |           |           |
|---|-----------|-----------|-----------|
| C | 1.253273  | 1.652987  | -0.117905 |
| C | 2.591806  | 1.193435  | 0.182398  |
| C | 3.533340  | 2.077236  | 0.793552  |
| C | 3.121339  | 3.337039  | 1.105060  |
| C | 1.773713  | 3.766269  | 0.832804  |
| C | 0.837410  | 2.964385  | 0.244571  |
| H | 4.541351  | 1.734685  | 1.004332  |
| H | 3.802500  | 4.037801  | 1.575275  |
| H | 1.495466  | 4.776685  | 1.118101  |
| H | -0.185093 | 3.276757  | 0.068521  |
| C | 2.682997  | -0.099289 | -0.296926 |
| N | 0.562259  | 0.716268  | -0.748420 |
| C | 1.316597  | -0.528915 | -0.744839 |
| C | 3.800519  | -0.954126 | -0.526527 |
| H | 4.750757  | -0.756816 | -0.041333 |
| C | 1.341494  | -1.388236 | -1.979649 |
| H | 0.407795  | -1.527529 | -2.517054 |
| C | 3.674561  | -1.909879 | -1.488171 |
| H | 4.531704  | -2.526806 | -1.741066 |
| C | 2.454529  | -2.087142 | -2.260905 |
| H | 2.462733  | -2.797416 | -3.080728 |
| H | -0.449837 | 0.794668  | -1.038194 |
| O | -2.029391 | 0.751805  | -1.472789 |
| C | -2.599892 | 1.058852  | -0.390864 |
| O | -2.193169 | 1.727689  | 0.559508  |
| C | -4.007991 | 0.428115  | -0.265490 |
| F | -3.915801 | -0.918028 | -0.233135 |
| F | -4.788621 | 0.736664  | -1.314082 |
| F | -4.658557 | 0.804602  | 0.840274  |
| C | 0.641667  | -1.451905 | 0.332666  |
| C | -0.724220 | -1.720851 | 0.185420  |
| C | 1.346893  | -2.006171 | 1.400596  |
| C | -1.377009 | -2.531664 | 1.106863  |
| H | -1.283526 | -1.284633 | -0.638185 |
| C | 0.683107  | -2.824868 | 2.316589  |
| H | 2.402927  | -1.807787 | 1.540515  |

|   |           |           |          |
|---|-----------|-----------|----------|
| C | -0.674123 | -3.089940 | 2.174951 |
| H | -2.439348 | -2.721278 | 0.990183 |
| H | 1.239302  | -3.246716 | 3.148174 |
| H | -1.185338 | -3.722566 | 2.893973 |

Pro4

|   |           |           |           |
|---|-----------|-----------|-----------|
| C | 1.390212  | 1.218736  | -0.772825 |
| C | 2.543399  | 0.993172  | 0.057647  |
| C | 3.263485  | 2.091969  | 0.607766  |
| C | 2.807245  | 3.352287  | 0.349858  |
| C | 1.630018  | 3.560348  | -0.442960 |
| C | 0.910591  | 2.535018  | -0.996483 |
| H | 4.143824  | 1.914651  | 1.217452  |
| H | 3.323766  | 4.217150  | 0.751780  |
| H | 1.297007  | 4.581615  | -0.603854 |
| H | 0.005792  | 2.697752  | -1.568546 |
| C | 2.718346  | -0.385323 | 0.125969  |
| N | 0.899682  | 0.063478  | -1.238677 |
| C | 1.568751  | -1.025558 | -0.560533 |
| C | 3.774695  | -1.197794 | 0.620931  |
| H | 4.524982  | -0.783275 | 1.285824  |
| C | 1.915981  | -2.274255 | -1.299170 |
| H | 1.203654  | -2.649976 | -2.028113 |
| C | 3.893287  | -2.458082 | 0.109713  |
| H | 4.728322  | -3.080124 | 0.418512  |
| C | 2.993801  | -2.978173 | -0.903242 |
| H | 3.213734  | -3.945132 | -1.342794 |
| H | -0.100469 | -0.054522 | -1.528041 |
| C | 0.545119  | -1.556803 | 0.576383  |
| H | 1.076915  | -2.335403 | 1.130126  |
| H | -0.270192 | -2.015895 | 0.008923  |
| C | -0.009440 | -0.487231 | 1.506959  |
| H | -0.267400 | 0.419915  | 0.949097  |
| H | 0.736842  | -0.210492 | 2.261503  |
| C | -1.287361 | -0.978649 | 2.192606  |
| H | -1.991575 | -1.323197 | 1.423809  |
| H | -1.065278 | -1.849495 | 2.822167  |
| C | -1.937640 | 0.126226  | 3.019160  |
| H | -2.181683 | 0.978377  | 2.376426  |
| H | -2.862585 | -0.219202 | 3.491867  |
| H | -1.263431 | 0.474569  | 3.809476  |
| O | -1.728615 | -0.578772 | -1.516430 |

|   |           |           |           |
|---|-----------|-----------|-----------|
| C | -2.334749 | 0.271936  | -0.820104 |
| O | -1.986492 | 1.396868  | -0.443470 |
| C | -3.771977 | -0.153816 | -0.420523 |
| F | -3.892604 | -1.481814 | -0.262327 |
| F | -4.651932 | 0.207260  | -1.375266 |
| F | -4.178990 | 0.415610  | 0.722863  |

ProSI-1

|   |           |           |           |
|---|-----------|-----------|-----------|
| C | -1.926448 | 0.321711  | -0.741986 |
| C | -1.333452 | 0.106985  | 0.503363  |
| C | -2.019928 | -0.587745 | 1.482679  |
| C | -3.313826 | -1.031495 | 1.188031  |
| C | -3.886161 | -0.809343 | -0.066409 |
| C | -3.194054 | -0.125409 | -1.068581 |
| H | -1.567482 | -0.783727 | 2.450043  |
| H | -3.881062 | -1.560784 | 1.946698  |
| H | -4.888177 | -1.172601 | -0.269770 |
| H | -3.624513 | 0.049786  | -2.048659 |
| C | 0.090918  | 0.609129  | 0.428936  |
| N | -1.021909 | 1.070753  | -1.538913 |
| C | 0.066512  | 1.367487  | -0.874303 |
| C | 0.652784  | 1.442658  | 1.542103  |
| H | 0.507413  | 1.084013  | 2.556859  |
| C | 1.047489  | 2.351361  | -1.190910 |
| H | 1.165158  | 2.718279  | -2.204014 |
| C | 1.404847  | 2.518077  | 1.259578  |
| H | 1.866931  | 3.095282  | 2.052867  |
| C | 1.658070  | 2.923807  | -0.120280 |
| H | 2.337833  | 3.754290  | -0.287025 |
| C | 1.065892  | -0.610773 | 0.163511  |
| C | 0.562920  | -1.847362 | -0.250575 |
| C | 2.447876  | -0.446443 | 0.290626  |
| C | 1.432152  | -2.904906 | -0.515037 |
| H | -0.503004 | -2.008367 | -0.364155 |
| C | 3.310121  | -1.506564 | 0.025133  |
| H | 2.866191  | 0.503695  | 0.602899  |
| C | 2.806619  | -2.741362 | -0.376694 |
| H | 1.022456  | -3.860050 | -0.828663 |
| H | 4.380113  | -1.360585 | 0.136389  |
| H | 3.480369  | -3.567925 | -0.579875 |
| H | -1.242855 | 1.434538  | -2.466298 |

ProSI-2

|   |           |           |           |
|---|-----------|-----------|-----------|
| C | -1.995871 | -0.208405 | -0.520489 |
| C | -1.002338 | -0.430681 | 0.439781  |
| C | -1.048602 | -1.576411 | 1.218296  |
| C | -2.101409 | -2.473258 | 1.011729  |
| C | -3.072141 | -2.238150 | 0.034691  |
| C | -3.036418 | -1.090741 | -0.758354 |
| H | -0.297190 | -1.766316 | 1.978323  |
| H | -2.165847 | -3.367485 | 1.623029  |
| H | -3.874020 | -2.955236 | -0.107429 |
| H | -3.786371 | -0.891143 | -1.516241 |
| C | 0.003109  | 0.682942  | 0.304268  |
| N | -1.754944 | 1.046275  | -1.126261 |
| C | -0.708684 | 1.639792  | -0.593297 |
| C | 0.676877  | 1.349453  | 1.453457  |
| H | 1.010595  | 0.734144  | 2.283393  |
| C | -0.273660 | 2.981855  | -0.747069 |
| H | -0.669807 | 3.611373  | -1.535585 |
| C | 0.973238  | 2.660680  | 1.371522  |
| H | 1.536919  | 3.152058  | 2.156668  |
| C | 0.542902  | 3.457003  | 0.235935  |
| H | 0.850007  | 4.498186  | 0.201536  |
| H | -2.363452 | 1.469225  | -1.826044 |
| C | 1.194172  | 0.136499  | -0.639258 |
| H | 1.801165  | 1.004168  | -0.916725 |
| H | 0.726869  | -0.263939 | -1.545898 |
| C | 2.062391  | -0.926801 | 0.020306  |
| H | 1.448301  | -1.780105 | 0.330675  |
| H | 2.539502  | -0.521306 | 0.920492  |
| C | 3.143310  | -1.414038 | -0.946783 |
| H | 2.666094  | -1.813305 | -1.850458 |
| H | 3.756356  | -0.561518 | -1.264635 |
| C | 4.031357  | -2.482845 | -0.316569 |
| H | 3.440119  | -3.354686 | -0.015847 |
| H | 4.800678  | -2.823246 | -1.016389 |
| H | 4.535293  | -2.096154 | 0.575973  |

- [1] M. J. Frisch, G. W. Trucks, H. B. Schlegel, G. E. Scuseria, M. A. Robb, J. R. Cheeseman, G. Scalmani, V. Barone, G. A. Petersson, H. Nakatsuji, X. Li, M. Caricato, A. V. Marenich, J. Bloino, B. G. Janesko, R. Gomperts, B. Mennucci, H. P. Hratchian, J. V. Ortiz, A. F. Izmaylov, J. L. Sonnenberg, Williams, F. Ding, F. Lipparini, F. Egidi, J. Goings, B. Peng, A. Petrone, T. Henderson, D. Ranasinghe, V. G. Zakrzewski, J. Gao, N. Rega, G. Zheng, W. Liang, M. Hada, M. Ehara, K. Toyota, R. Fukuda, J. Hasegawa, M. Ishida, T. Nakajima, Y. Honda, O. Kitao, H. Nakai, T. Vreven, K. Throssell, J. A. Montgomery Jr., J. E. Peralta, F. Ogliaro, M. J. Bearpark, J. J. Heyd, E. N. Brothers, K. N. Kudin, V. N. Staroverov, T. A. Keith, R. Kobayashi, J. Normand, K. Raghavachari, A. P. Rendell, J. C. Burant, S. S. Iyengar, J. Tomasi, M. Cossi, J. M. Millam, M. Klene, C. Adamo, R. Cammi, J. W. Ochterski, R. L. Martin, K. Morokuma, O. Farkas, J. B. Foresman, and D. J. Fox, Wallingford, CT, **2016**.
- [2] Y. Zhao, and D. G. Truhlar, The M06 suite of density functionals for main group thermochemistry, thermochemical kinetics, noncovalent interactions, excited states, and transition elements: two new functionals and systematic testing of four M06-class functionals and 12 other functionals, *Theoretical chemistry accounts*. 2008, **120**, 215.
- [3] J. D. Dill, and J. A. Pople, Self-consistent molecular orbital methods. XV. Extended Gaussian-type basis sets for lithium, beryllium, and boron, *The Journal of Chemical Physics*. 1975, **62**, 2921.
- [4] A. Schäfer, C. Huber, and R. Ahlrichs, Fully optimized contracted Gaussian basis sets of triple zeta valence quality for atoms Li to Kr, *The Journal of Chemical Physics*. 1994, **100**, 5829.
- [5] A. V. Marenich, C. J. Cramer, and D. G. Truhlar, Universal solvation model based on solute electron density and on a continuum model of the solvent defined by the bulk dielectric constant and atomic surface tensions, *The Journal of Physical Chemistry B*. 2009, **113**, 6378.
- [6] H. P. Hratchian, and H. B. Schlegel, Accurate reaction paths using a Hessian based predictor–corrector integrator, *The Journal of chemical physics*. 2004, **120**, 9918.



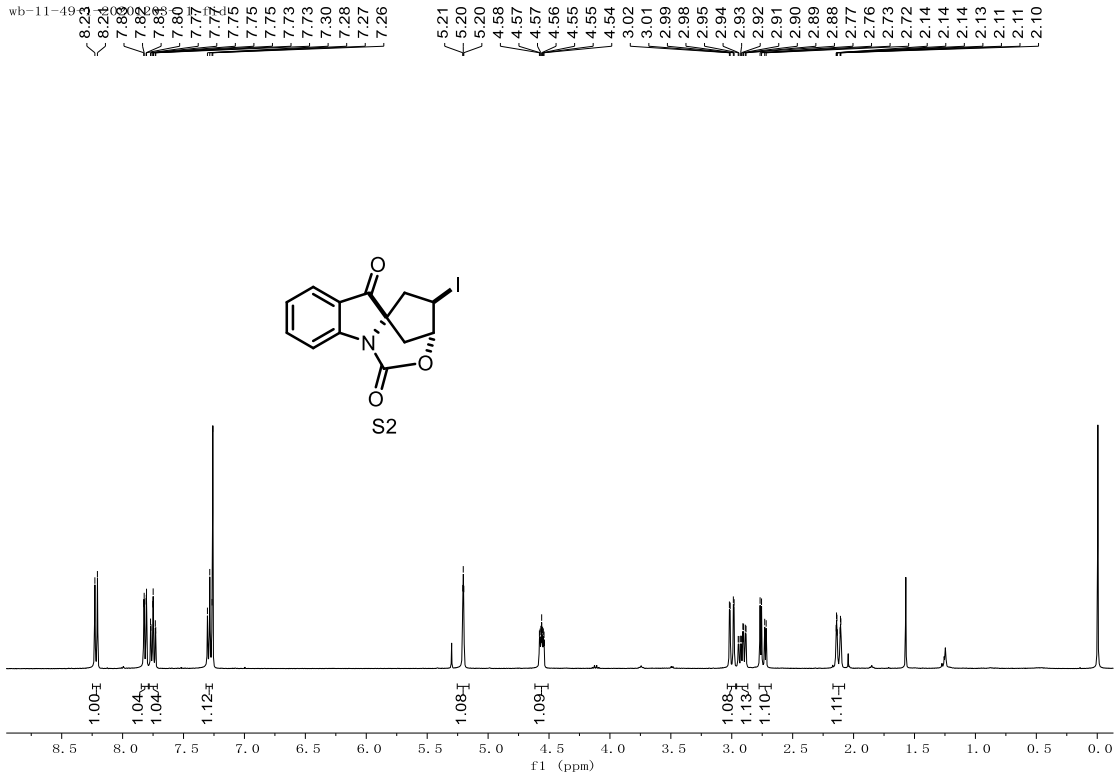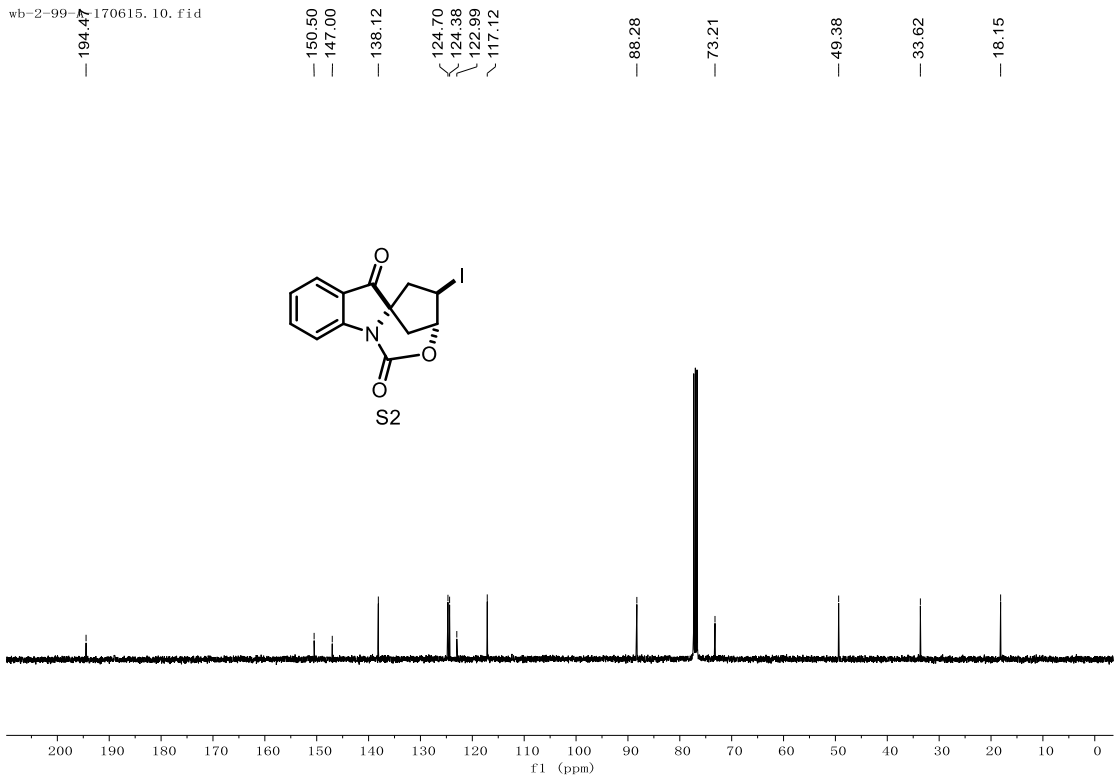

wb-2-100-a-170610

8.18  
8.18  
8.16  
7.80  
7.79  
7.78  
7.77  
7.73  
7.73  
7.71  
7.71  
7.70  
7.69  
7.69  
7.26  
7.26  
7.25  
7.24  
7.24  
7.22  
7.22  
6.65  
6.64  
6.63  
6.63  
6.40  
6.40  
6.39  
6.38  
6.38  
5.47  
5.47  
5.46  
5.46  
2.61  
2.59  
2.58  
2.14  
2.14  
2.12  
2.11

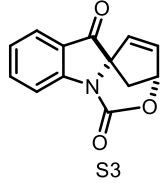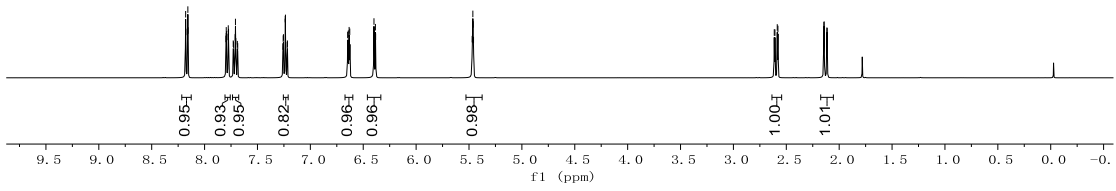

wb-2-100-a-170610-.11.fid

196.76  
151.01  
147.50  
138.38  
138.09  
136.52  
124.32  
124.18  
122.74  
117.13  
82.48  
73.51  
43.05

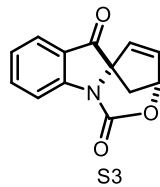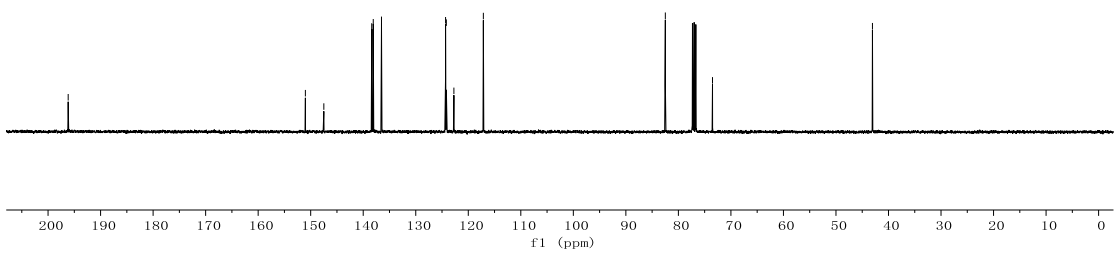

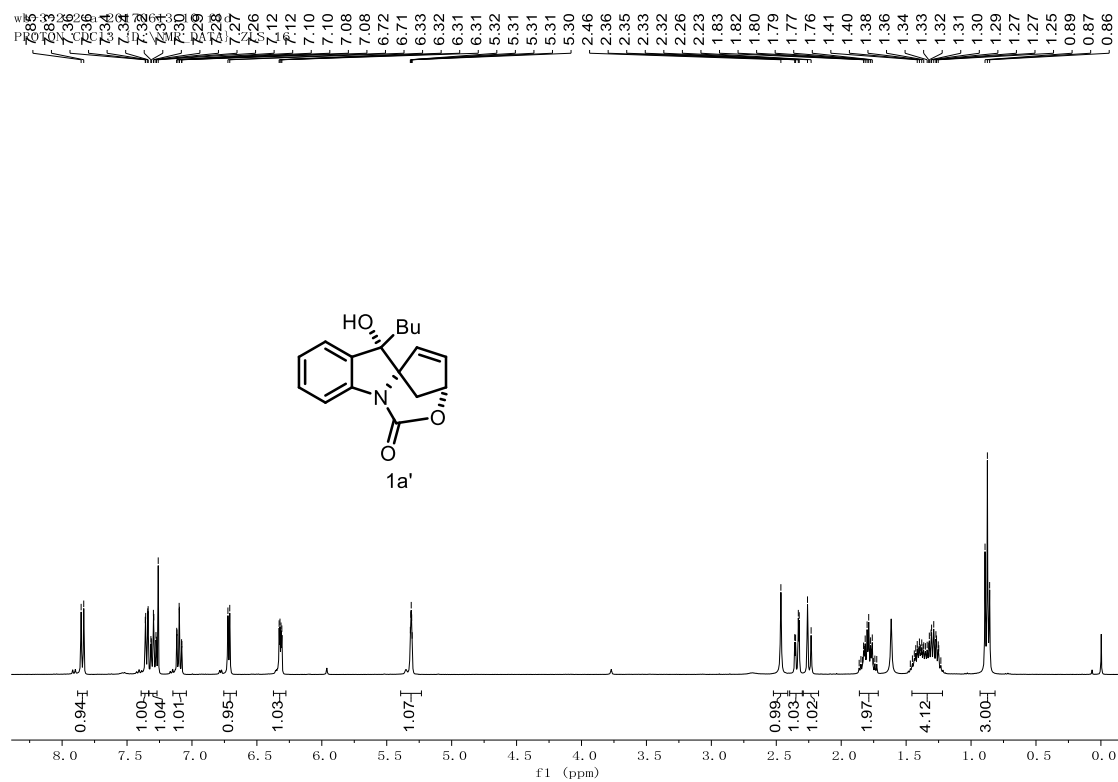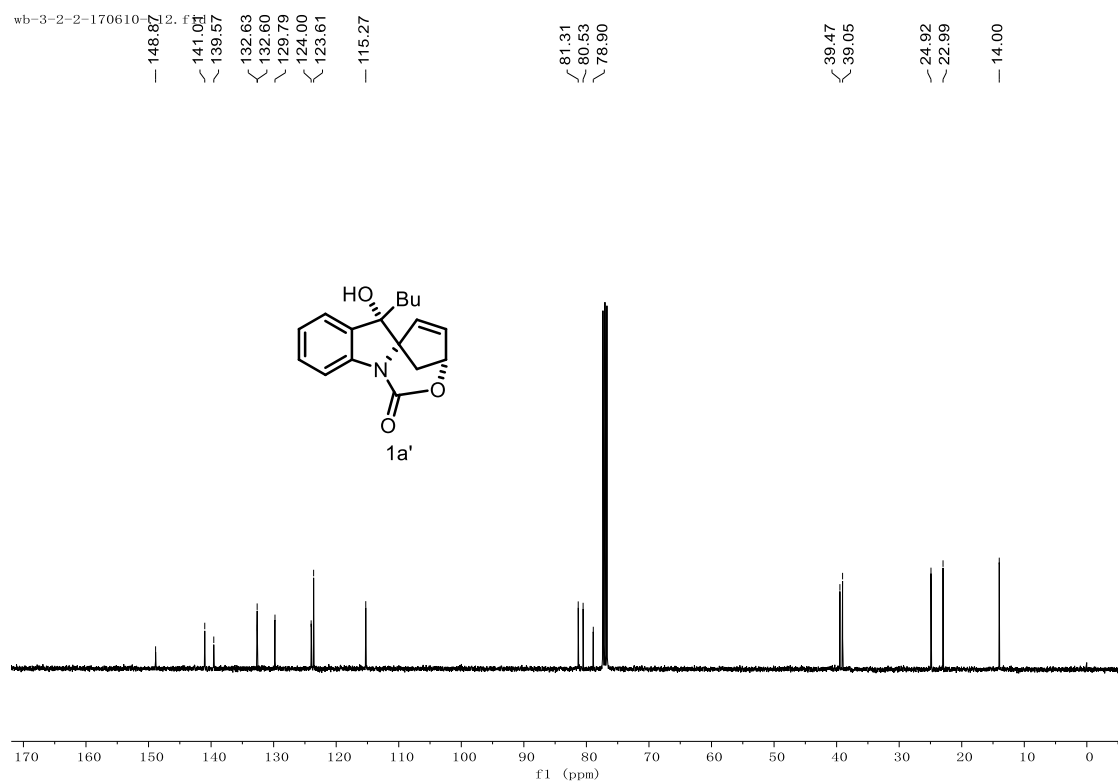

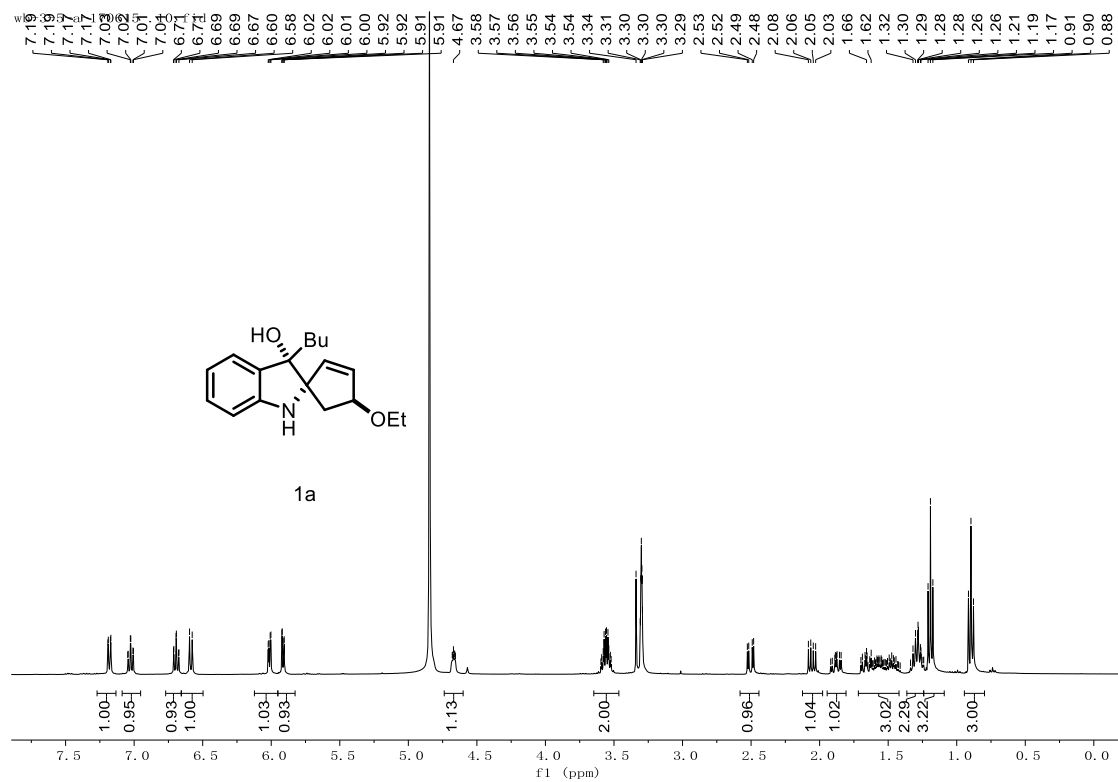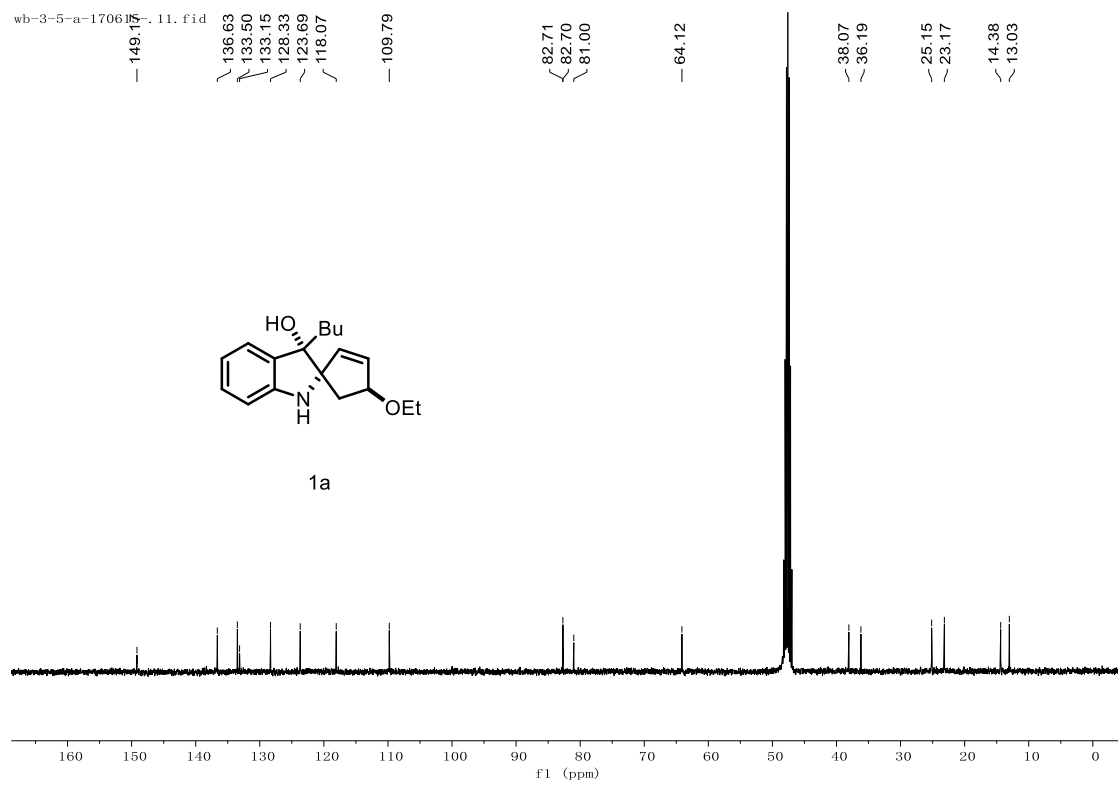

wb-13-27-2  
 PROTON CDCl<sub>3</sub>

3.04  
 2.35  
 2.34  
 2.32  
 2.32  
 2.22  
 2.19  
 1.94  
 1.92  
 1.90  
 1.89  
 1.87  
 1.85  
 1.80  
 1.78  
 1.76  
 1.74  
 1.72  
 1.71  
 0.99  
 0.97  
 0.95

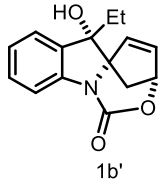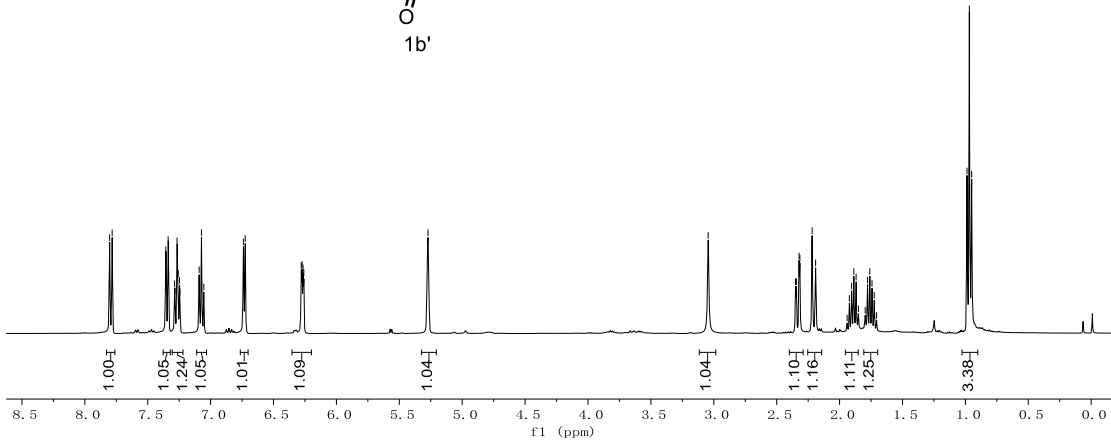

wb-13-27-2-20130  
 C13CPD CDCl<sub>3</sub>

81.36  
 80.42  
 78.90

39.32

31.87

7.30

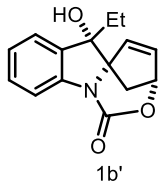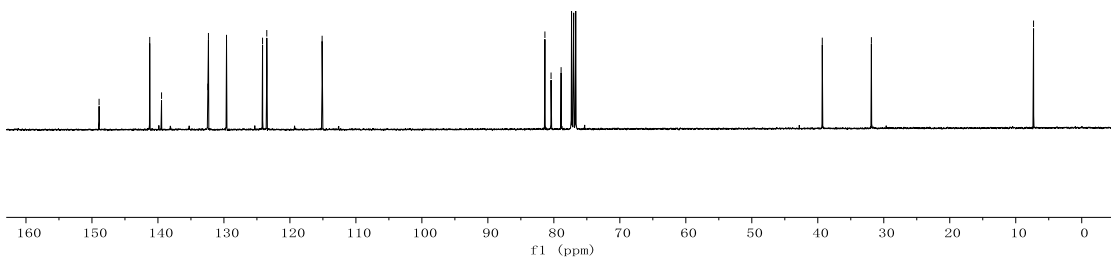

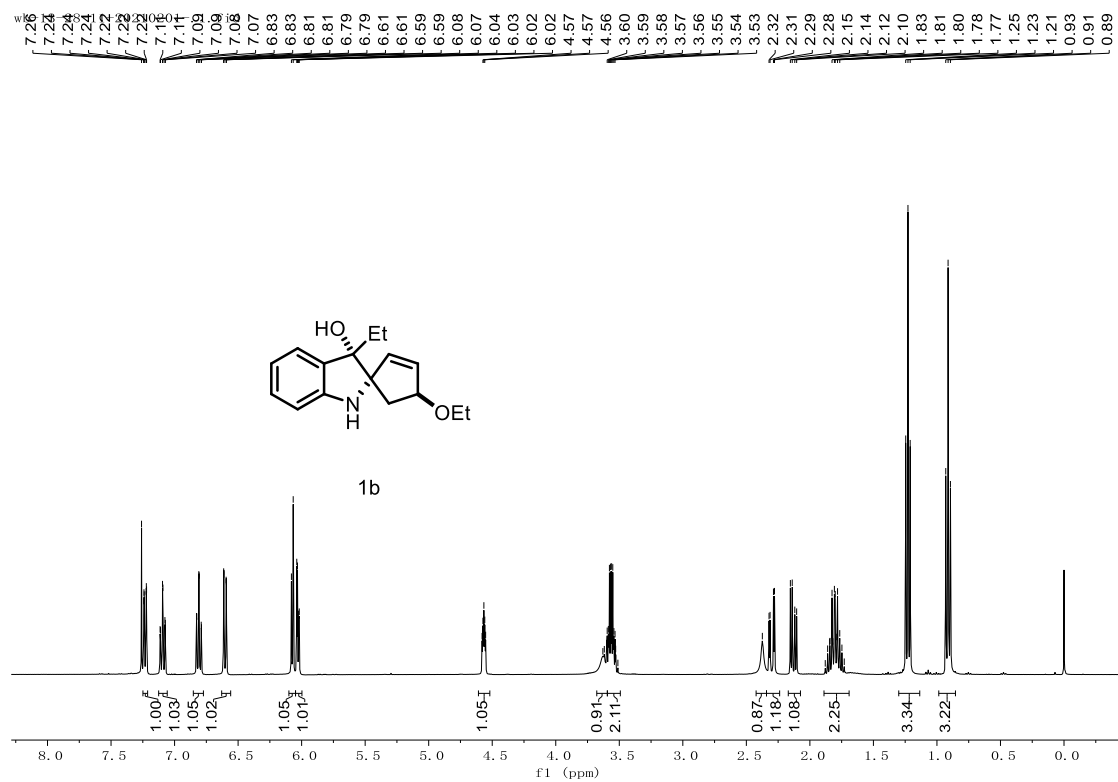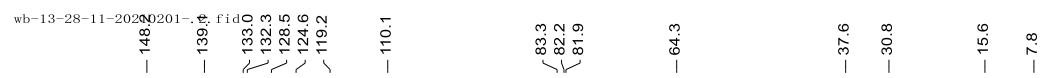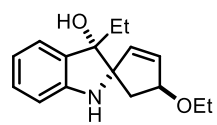

**1b**

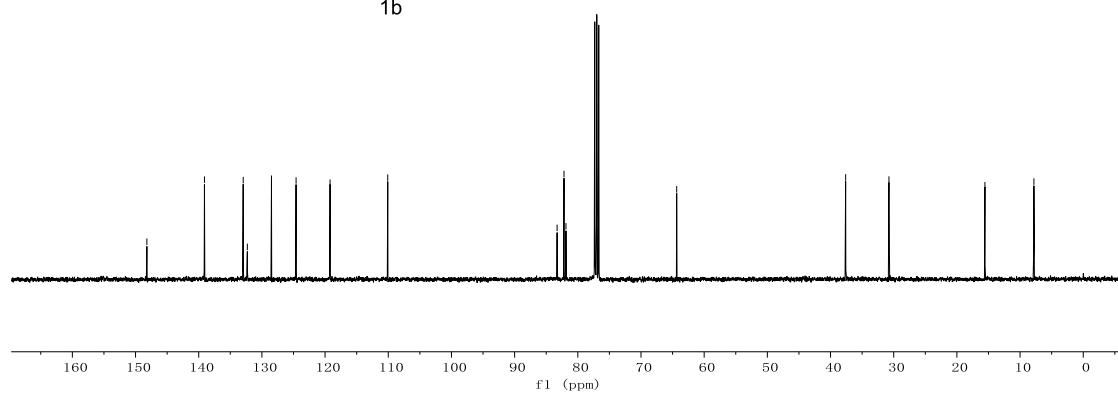

wb-13-68-1-20210325.  
 PROTON CDC13 /home/nmr

8.08  
 8.07  
 7.506  
 7.505  
 7.332  
 7.331  
 7.330  
 7.29  
 7.29  
 7.28  
 7.26  
 7.17  
 7.16  
 7.16

5.16  
 4.54  
 4.54  
 4.53  
 4.52  
 4.52  
 4.51

3.81  
 2.97  
 2.96  
 2.96  
 2.93  
 2.91  
 2.89  
 2.88  
 2.85  
 2.73  
 2.72  
 2.71  
 2.69  
 2.68  
 2.67  
 2.11  
 2.08

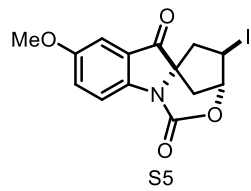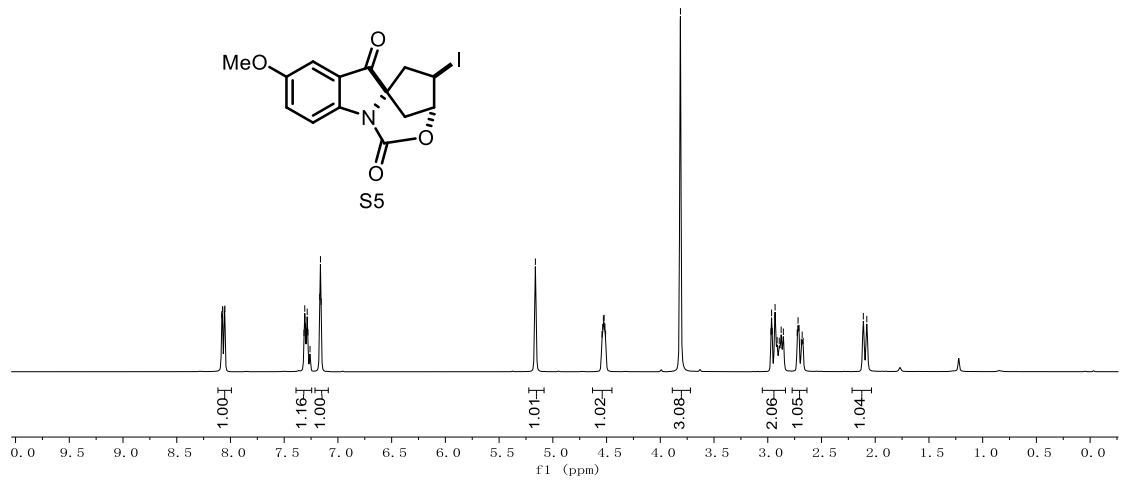

wb-13-68-1-20210325.11.fid  
 C13 CDCl3 /home/nmr/NMR

156.96  
 146.92  
 145.11

127.16  
 123.88  
 118.11

104.83

88.18

73.57

55.79

49.32

33.64

18.32

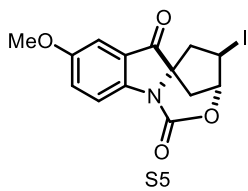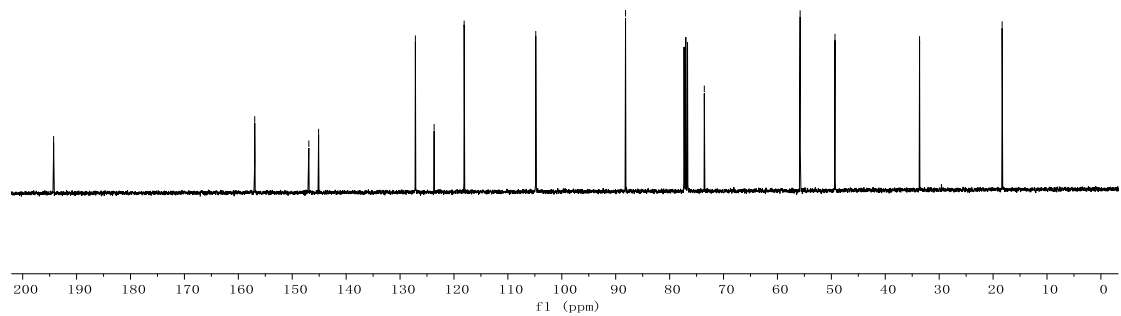

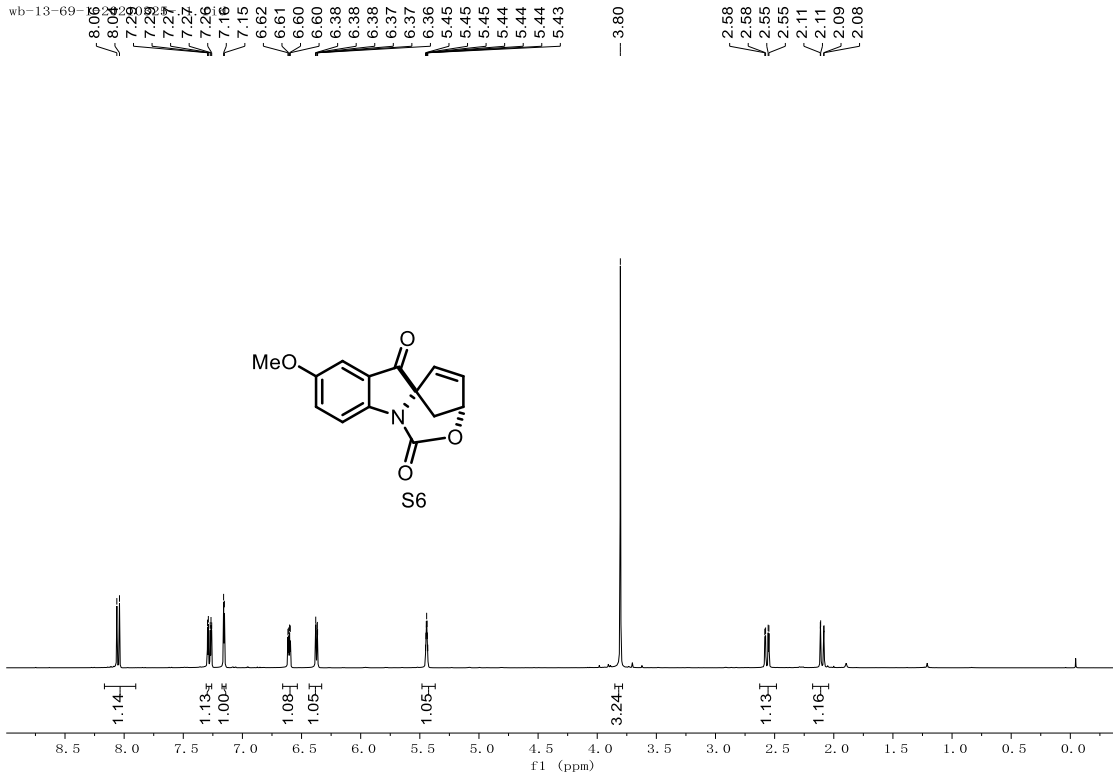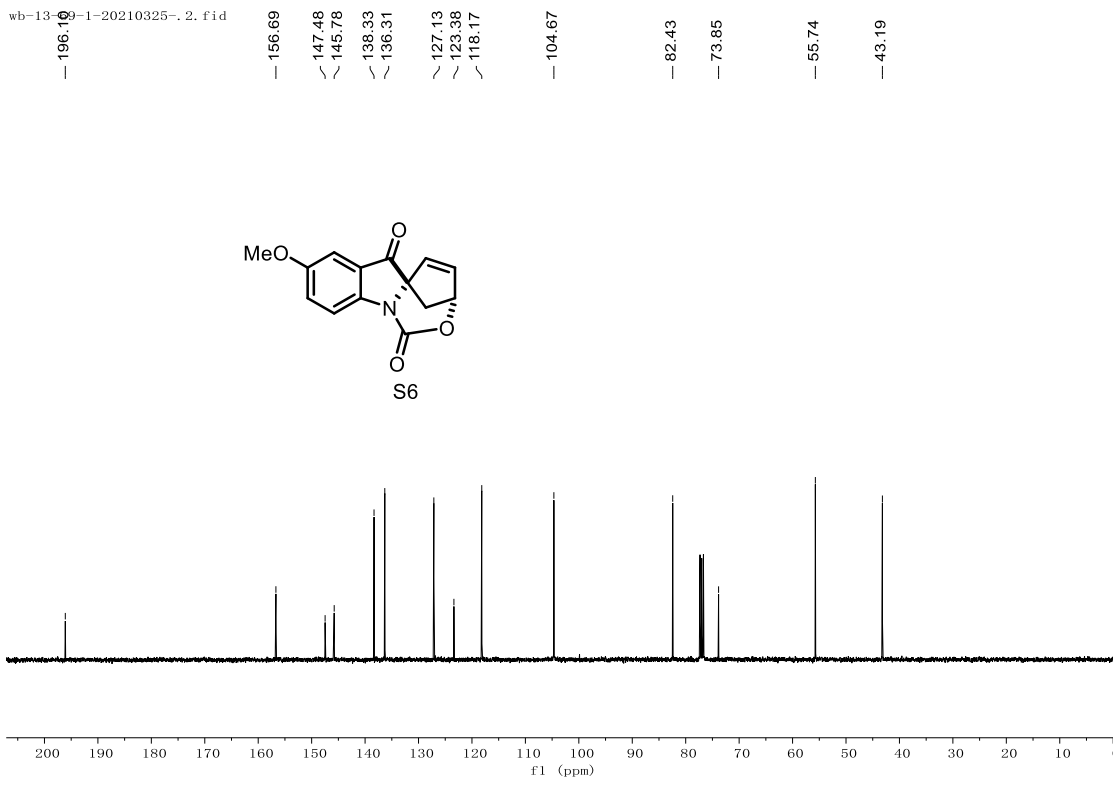



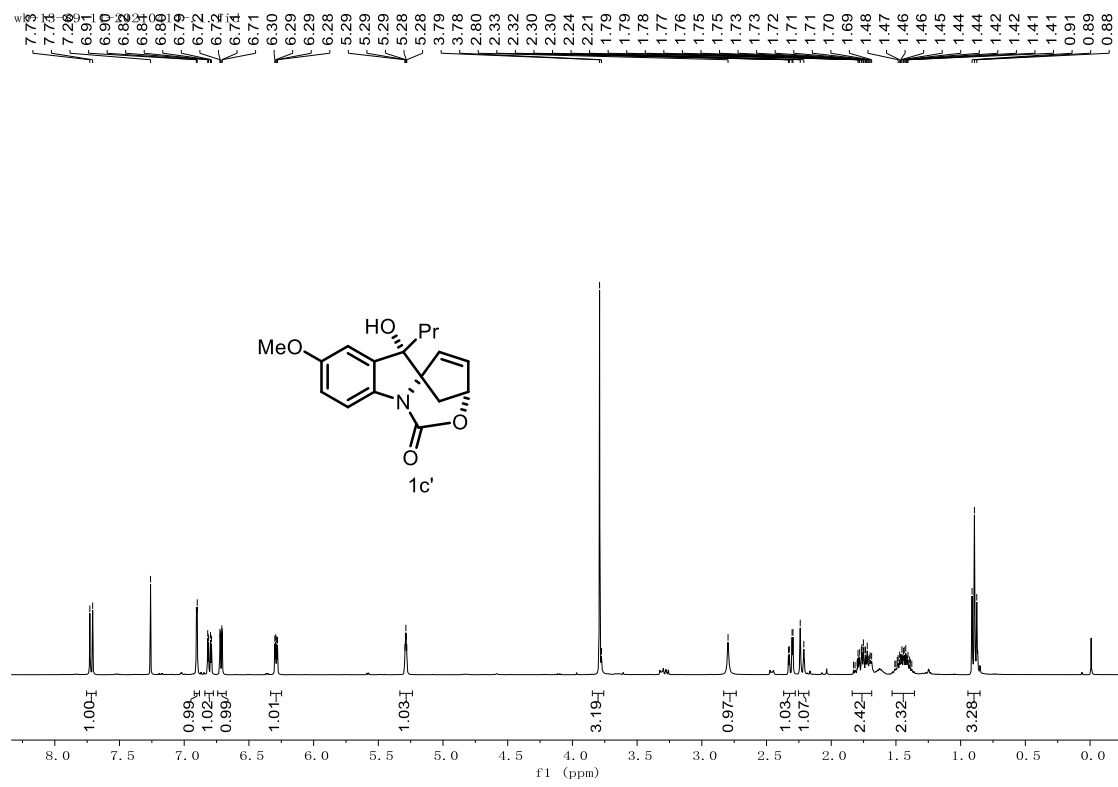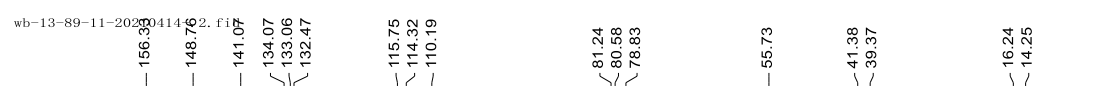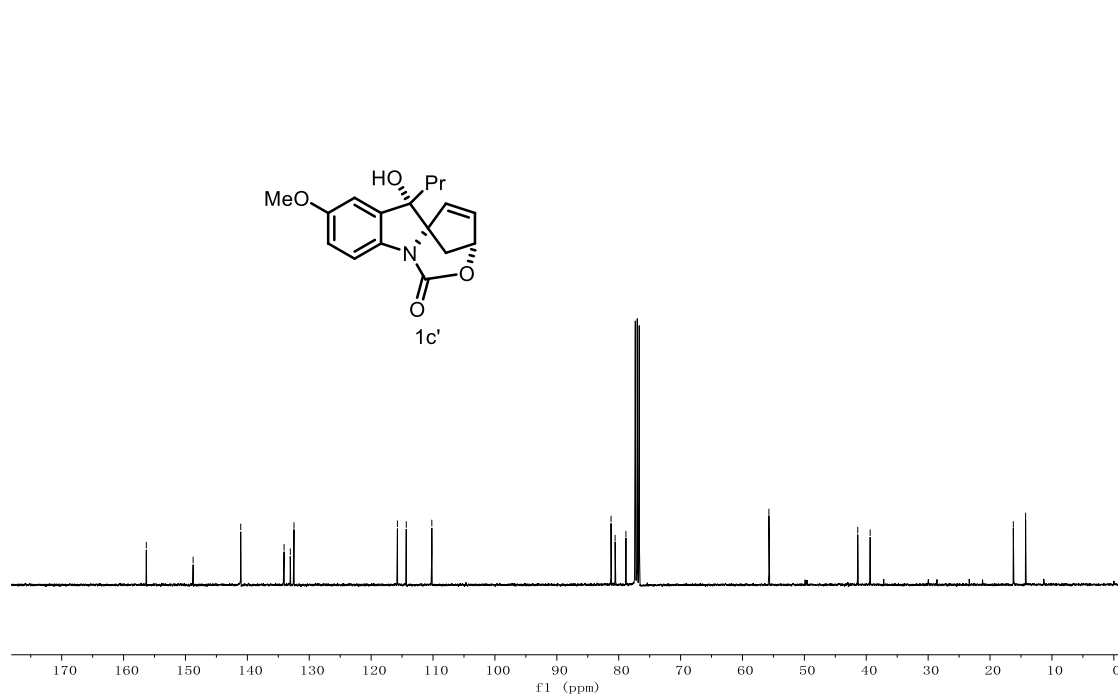

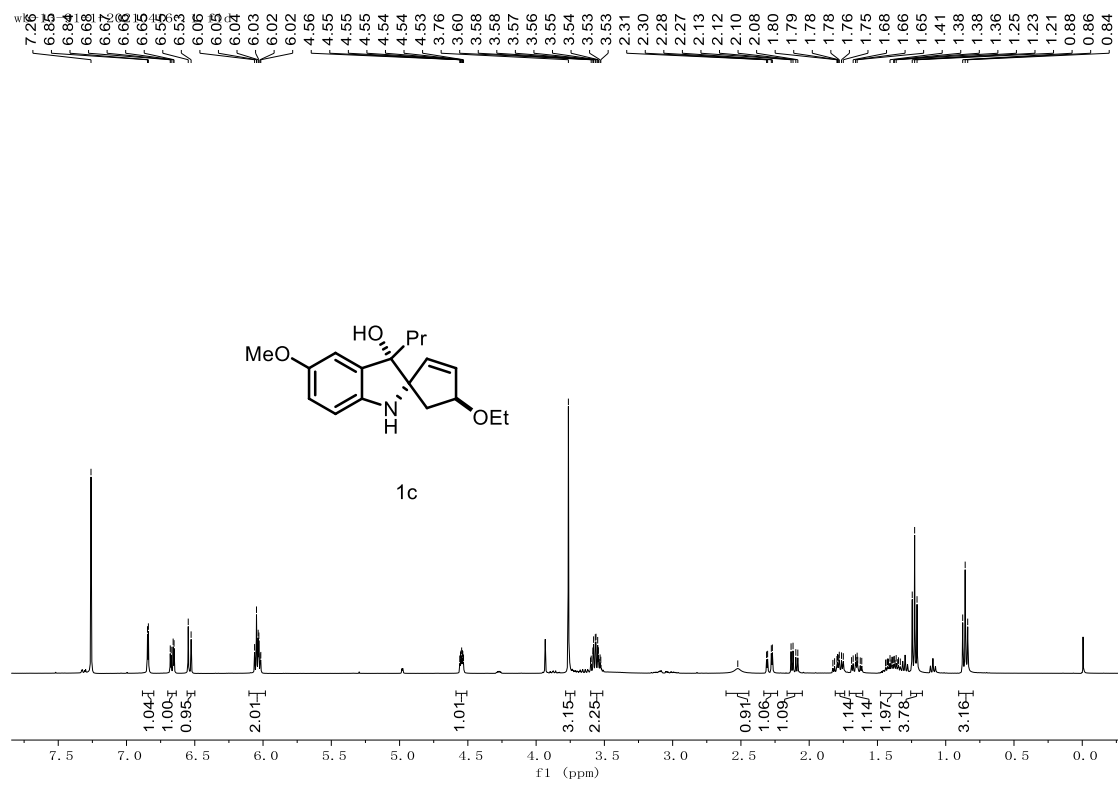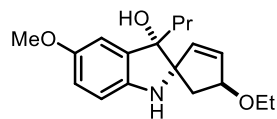

1c

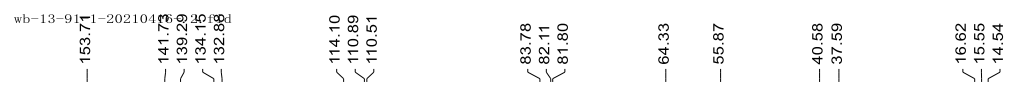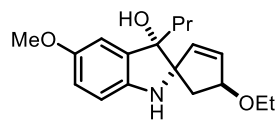

1c

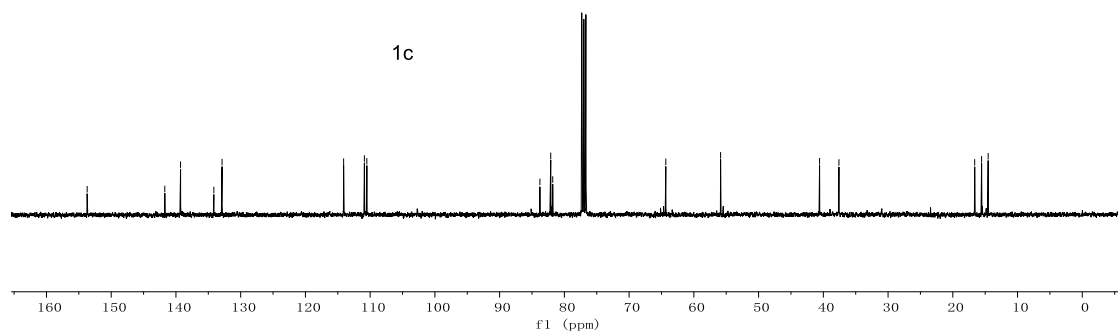

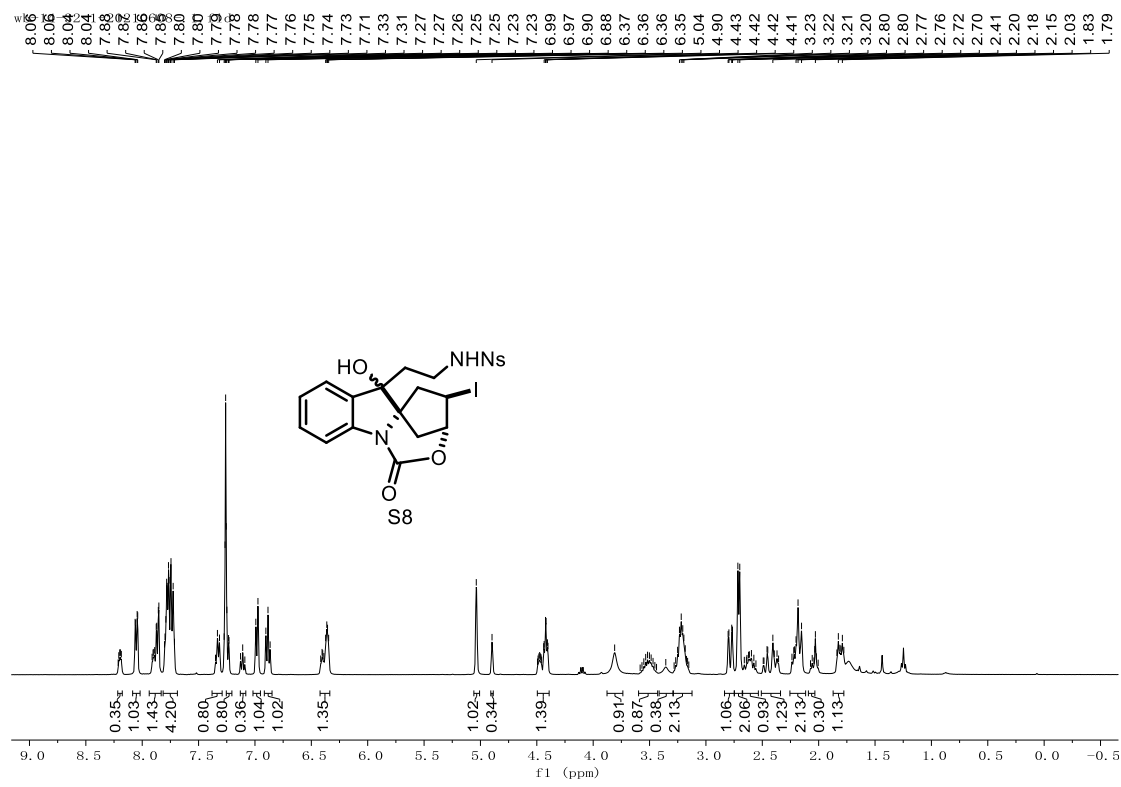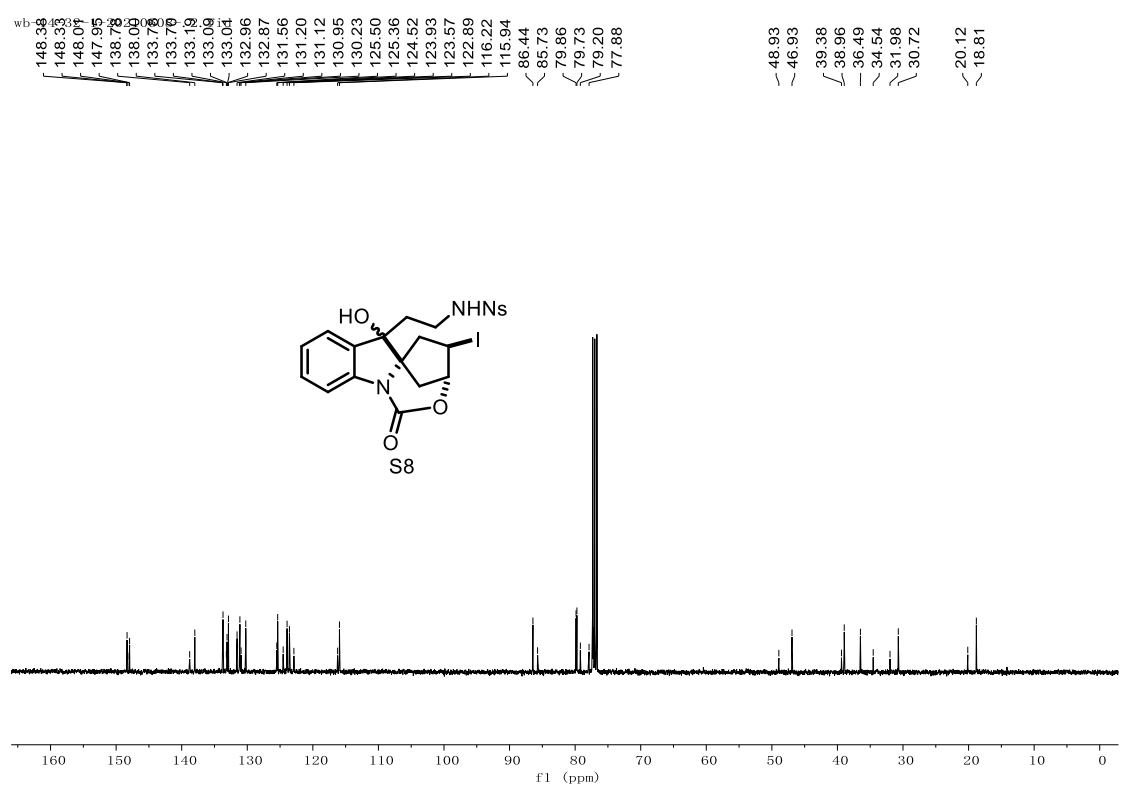

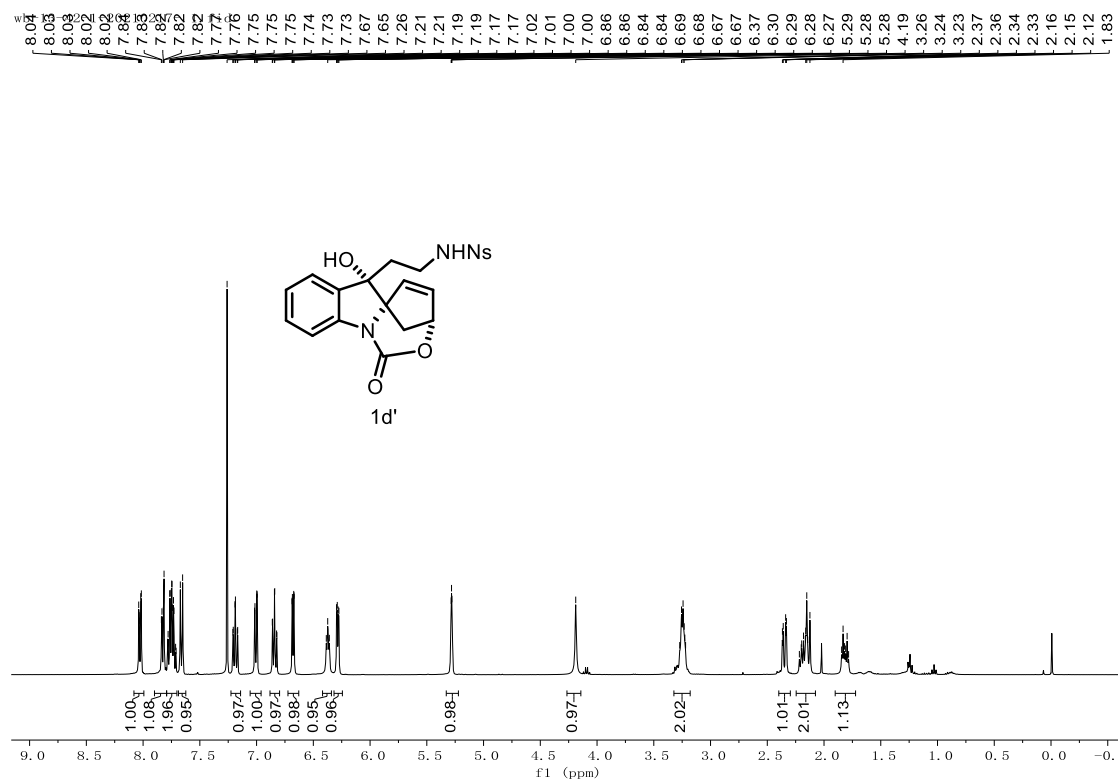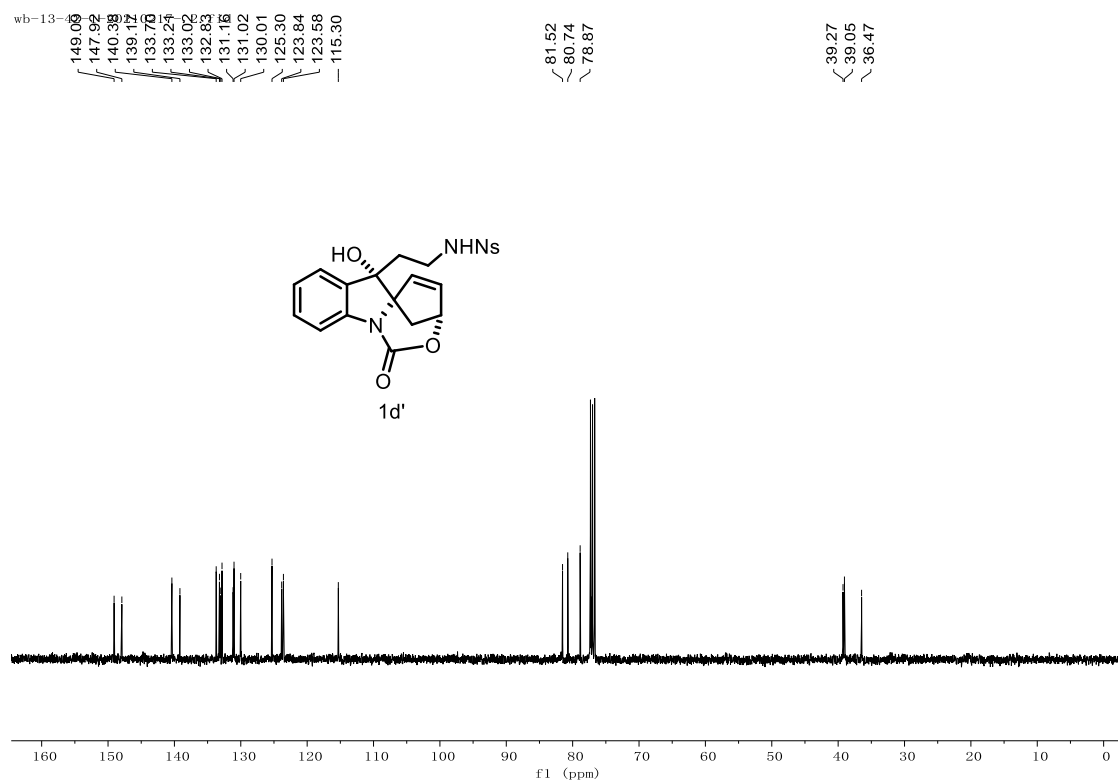

8.05  
8.05  
8.05  
8.03  
8.03  
7.88  
7.86  
7.85  
7.85  
7.84  
7.74  
7.74  
7.72  
7.72  
7.72  
7.70  
7.70  
7.70  
7.26  
7.02  
7.02  
6.86  
6.86  
6.85  
6.84  
6.84  
6.58  
6.57  
6.56  
6.56  
6.55  
6.55  
6.55  
6.54  
6.54  
6.04  
6.04  
6.03  
6.02  
5.94  
5.93  
4.52  
4.51  
4.50  
3.57  
3.55  
3.53  
3.11  
3.11  
3.10  
2.26  
2.26  
2.08  
2.07  
2.04  
2.03  
2.02  
1.24  
1.22  
1.21

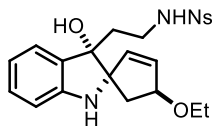

1d

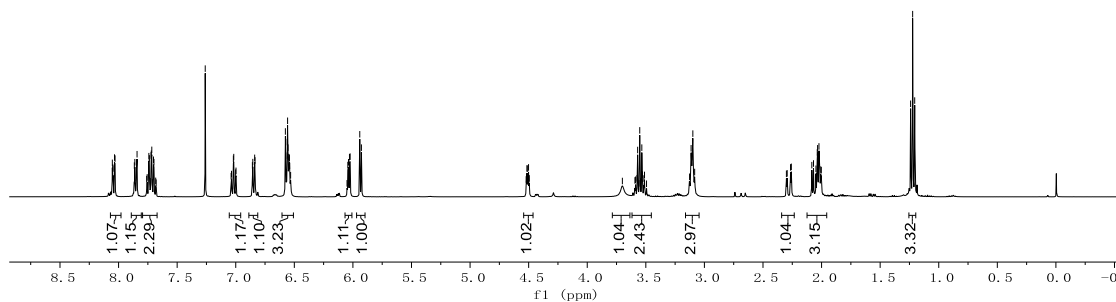

wb-13-  
148.05  
147.76  
138.28  
134.14  
133.51  
133.26  
132.49  
131.06  
131.04  
128.92  
125.03  
123.73  
119.45  
— 110.64  
—  
83.61  
81.68  
81.59  
— 64.52  
—  
39.94  
37.32  
35.68  
— 15.49

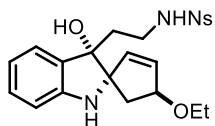

1d

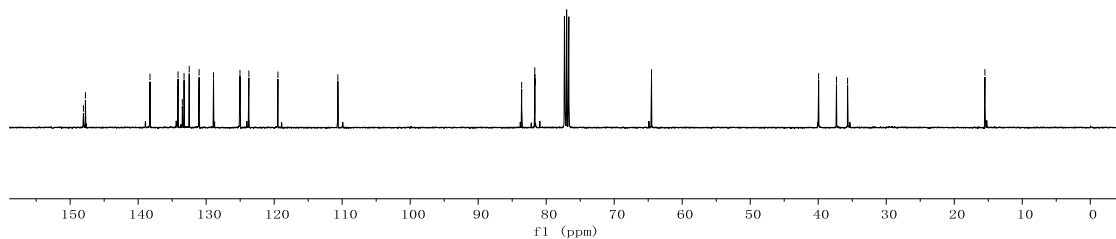

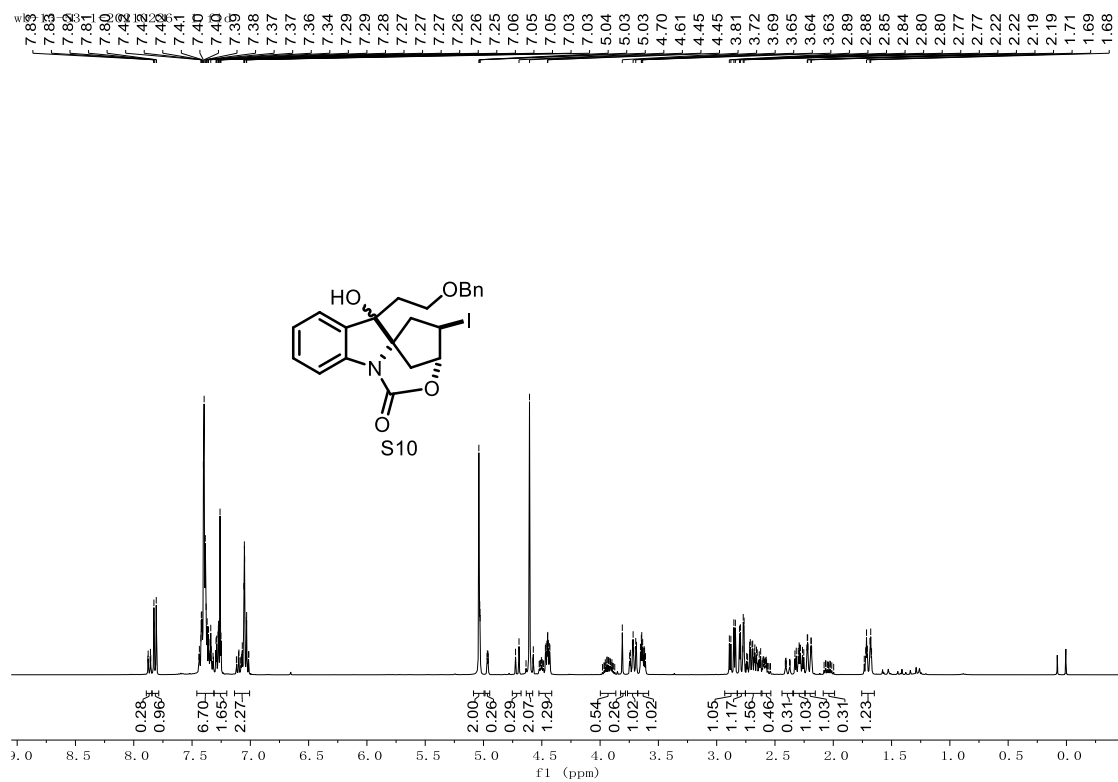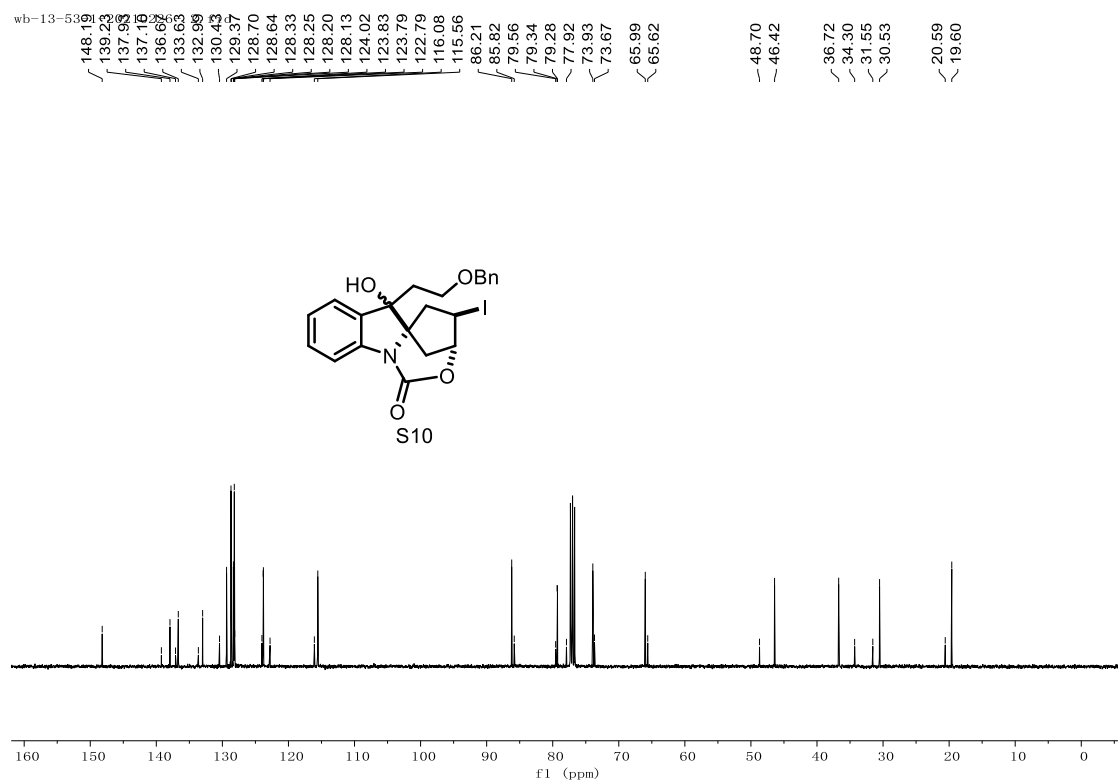

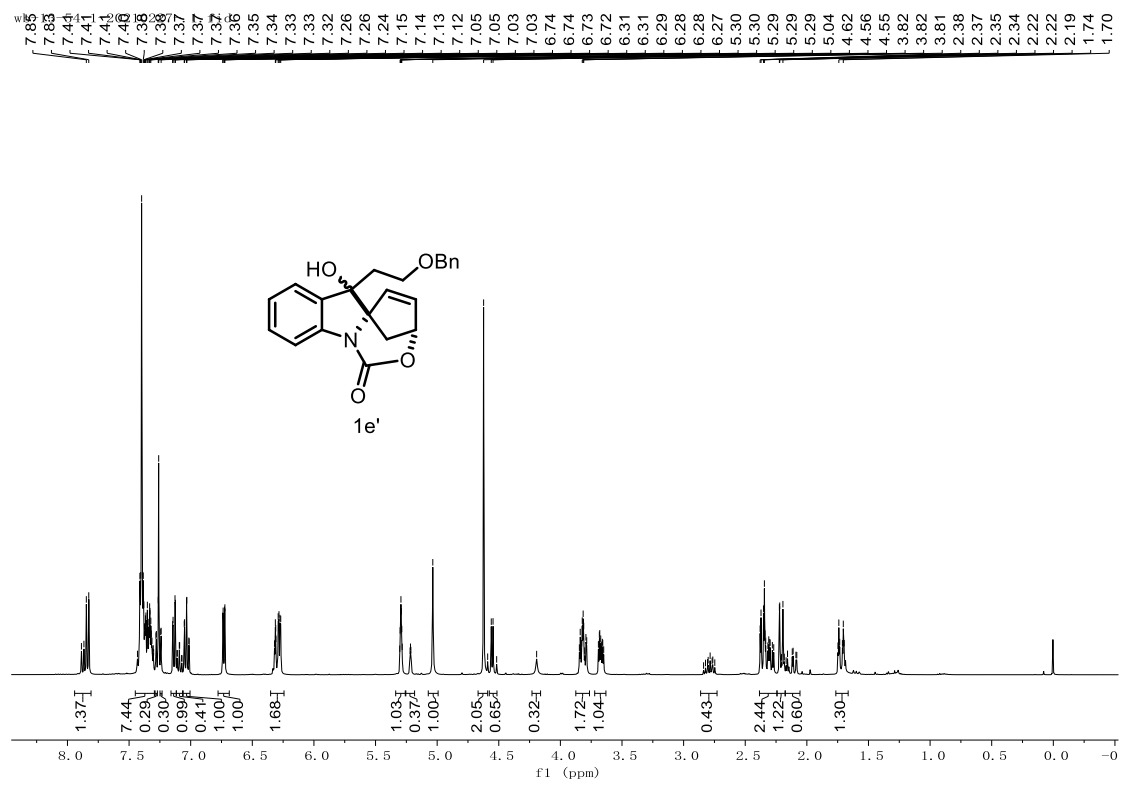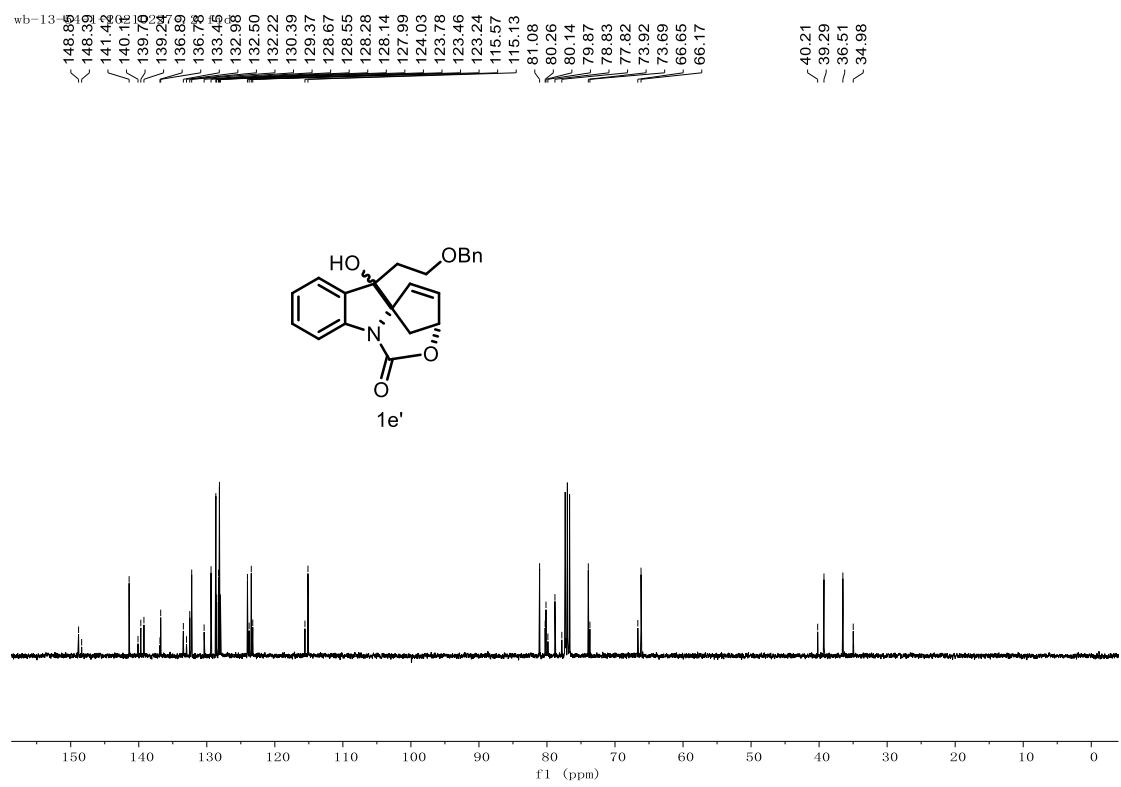

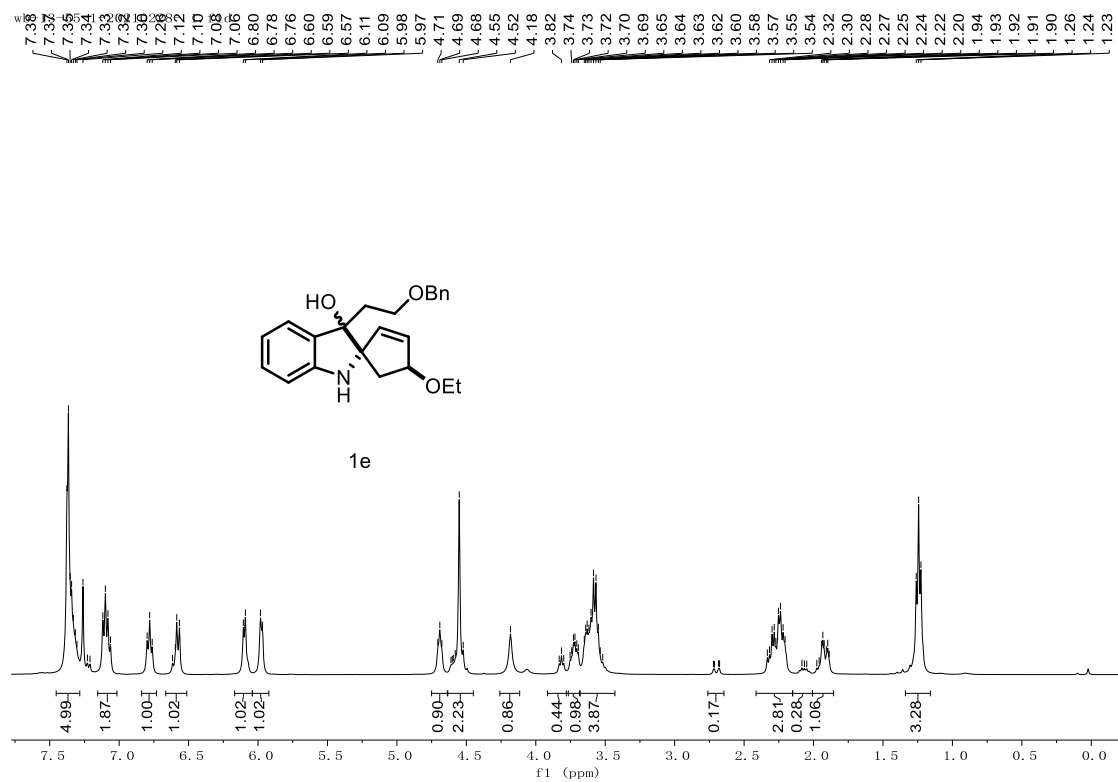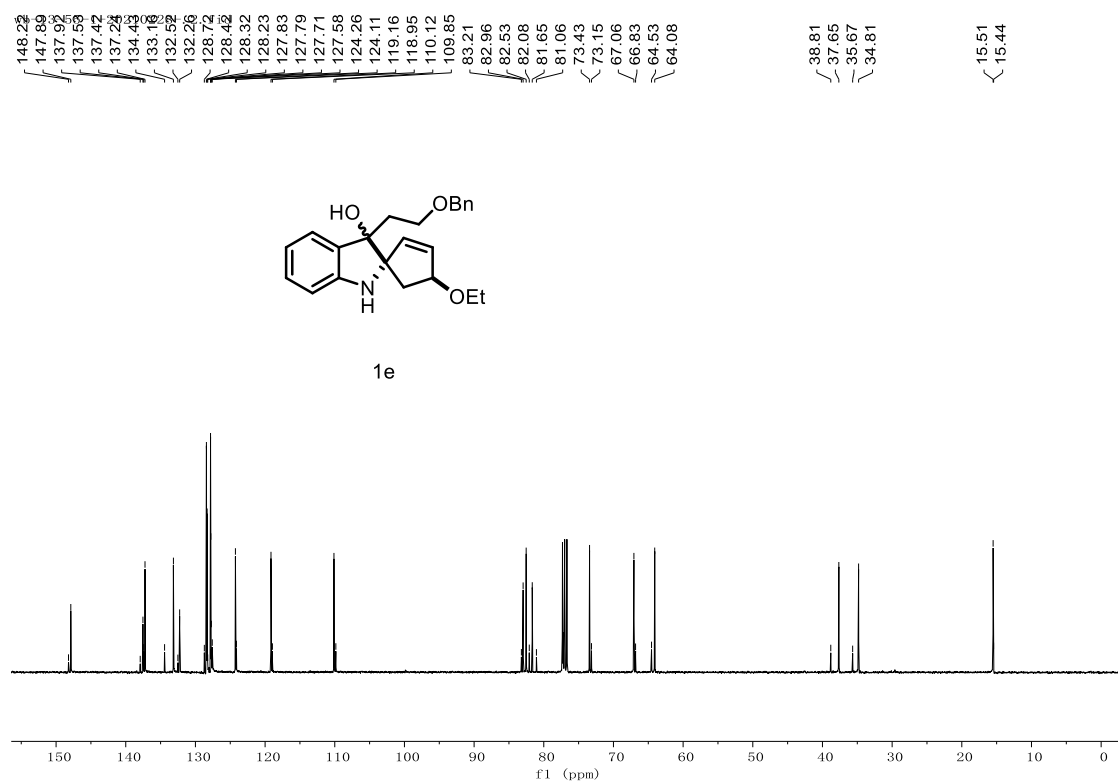



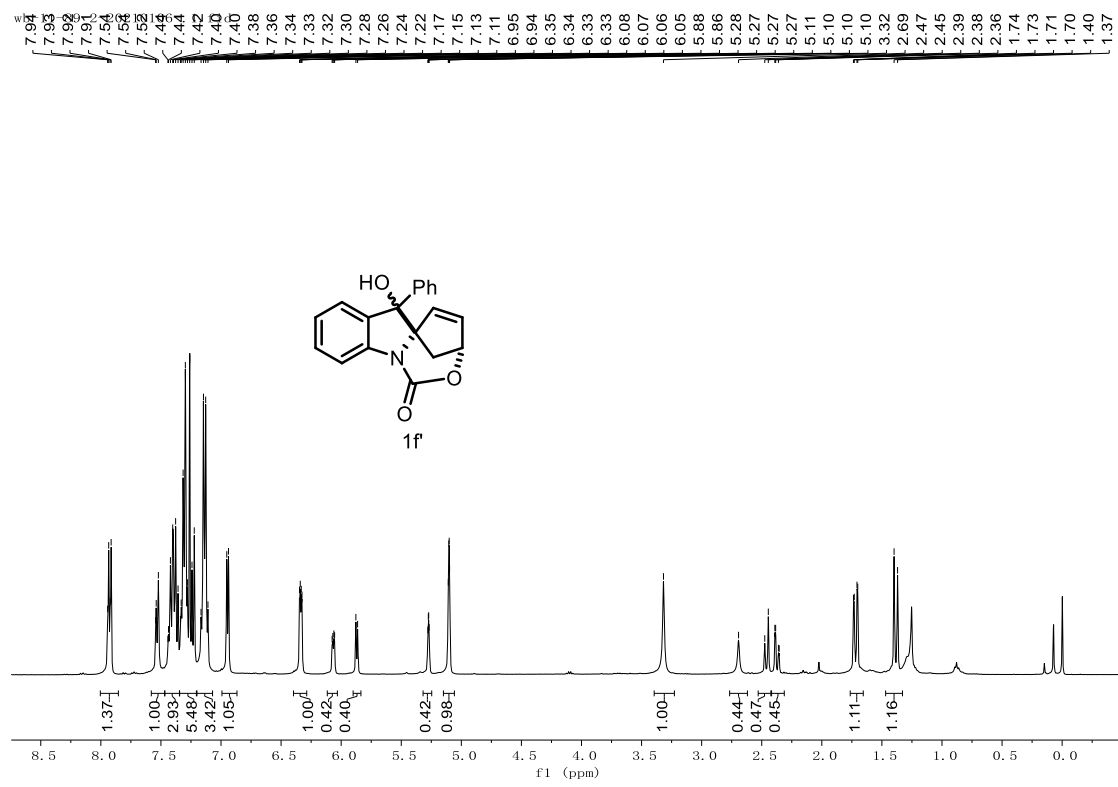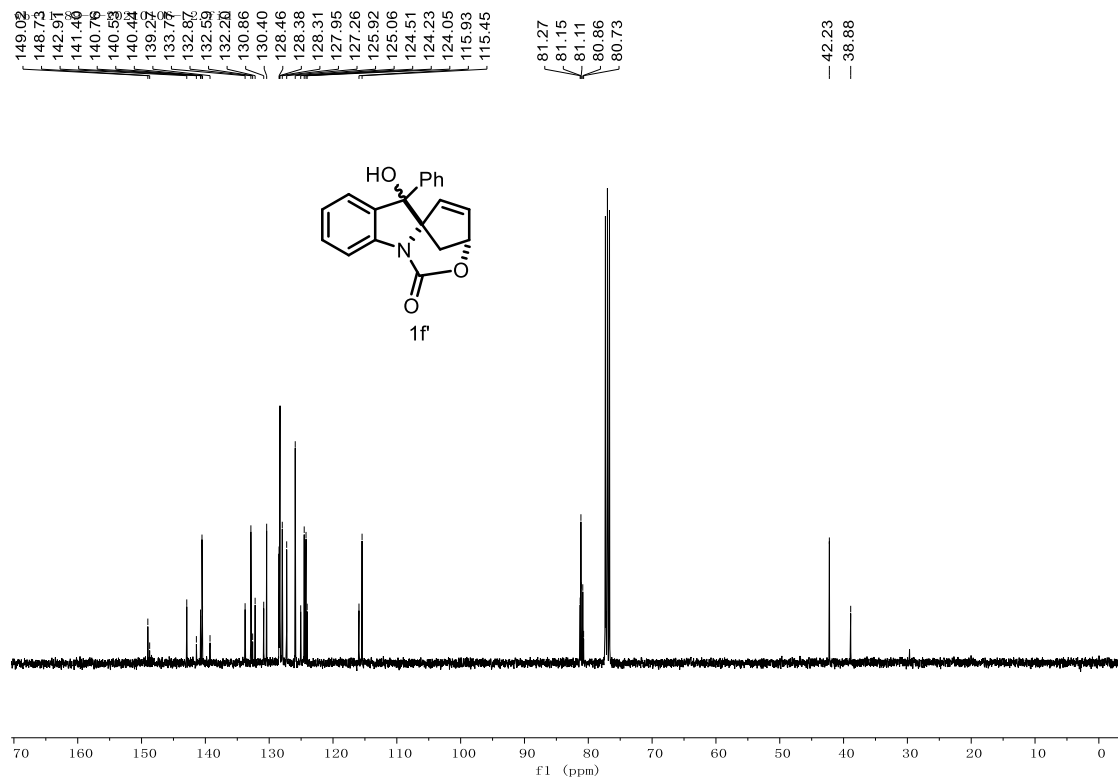

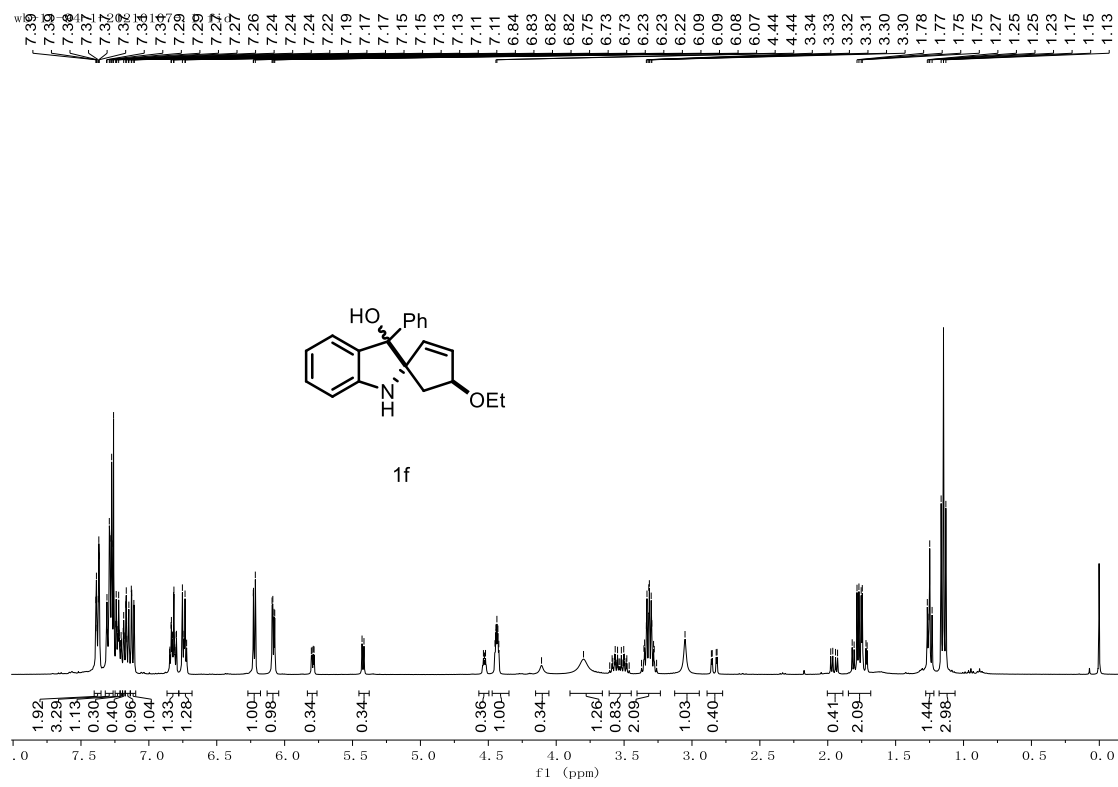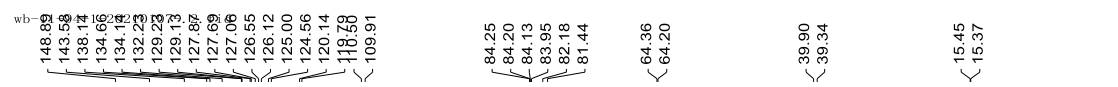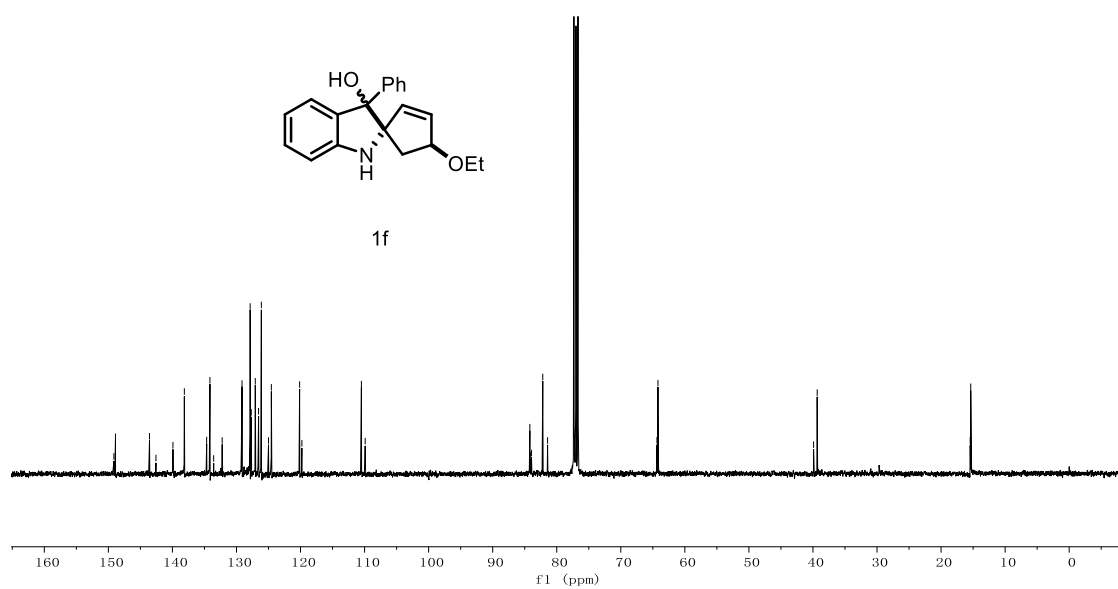

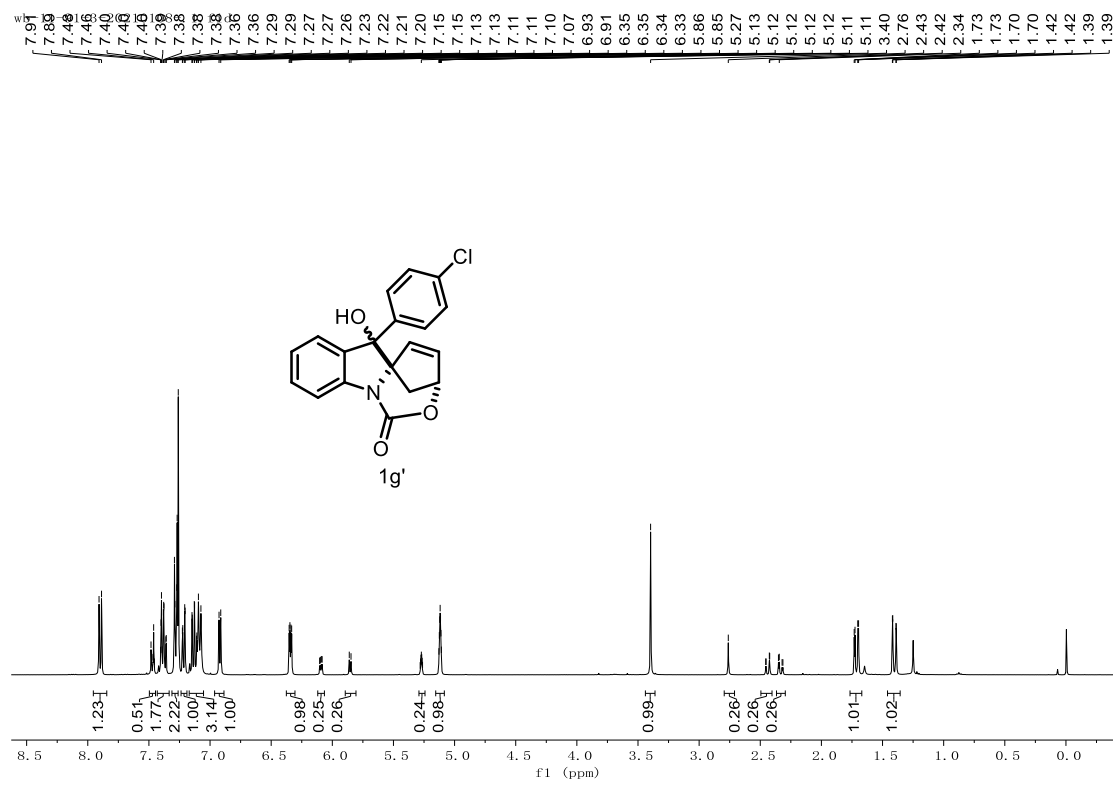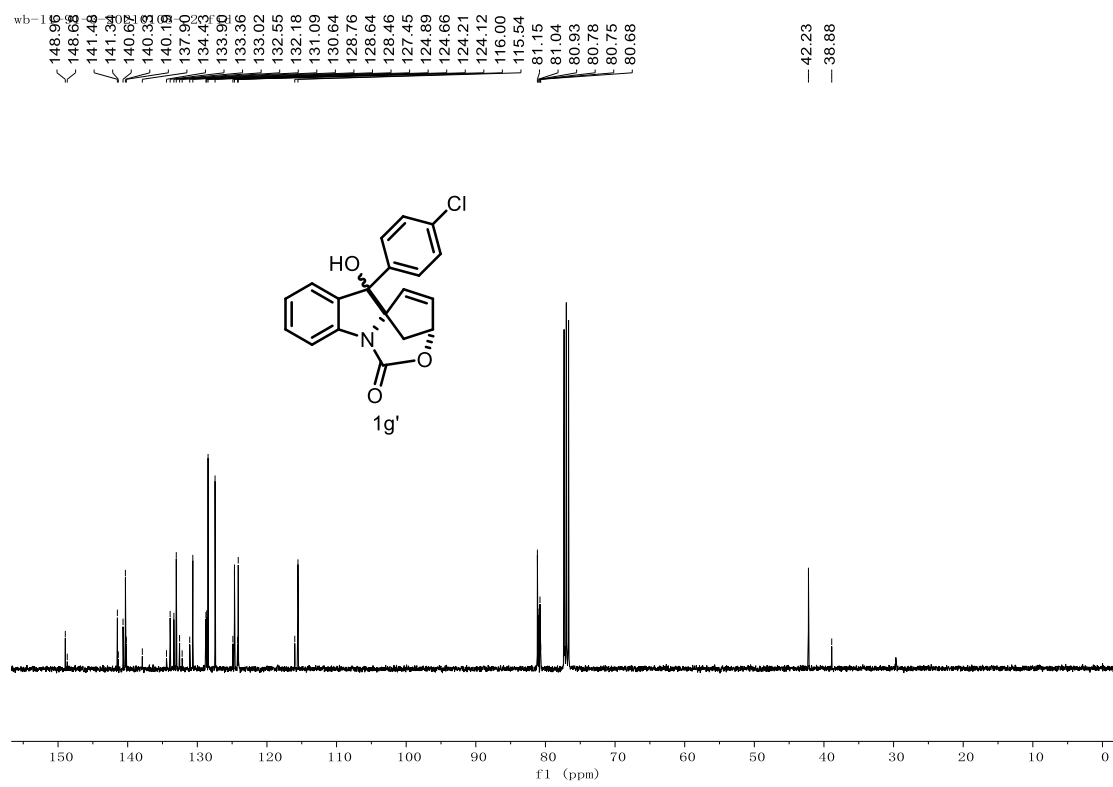

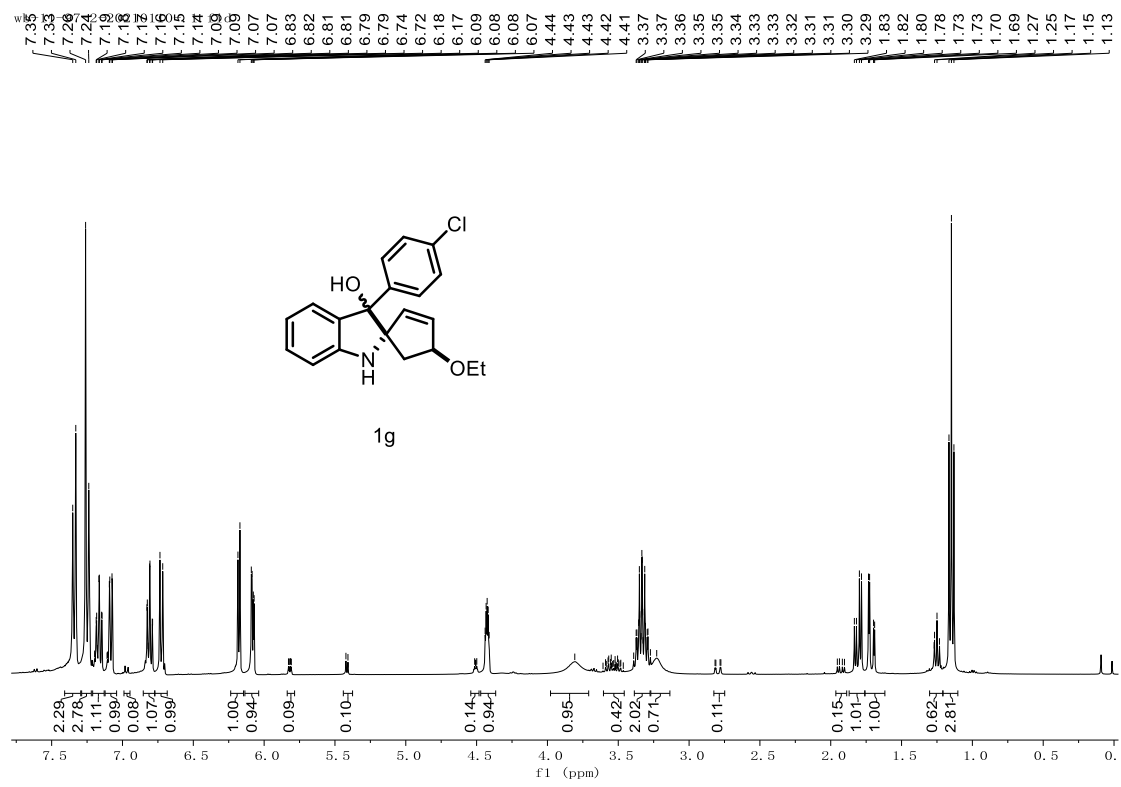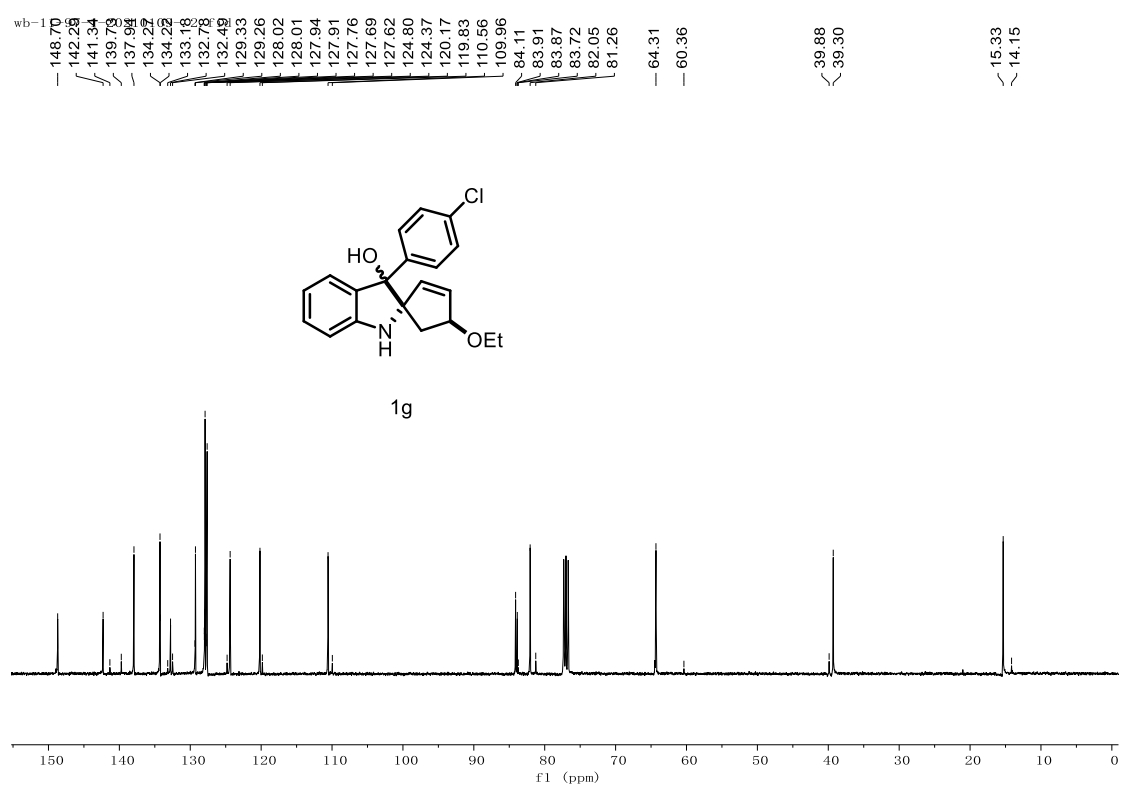

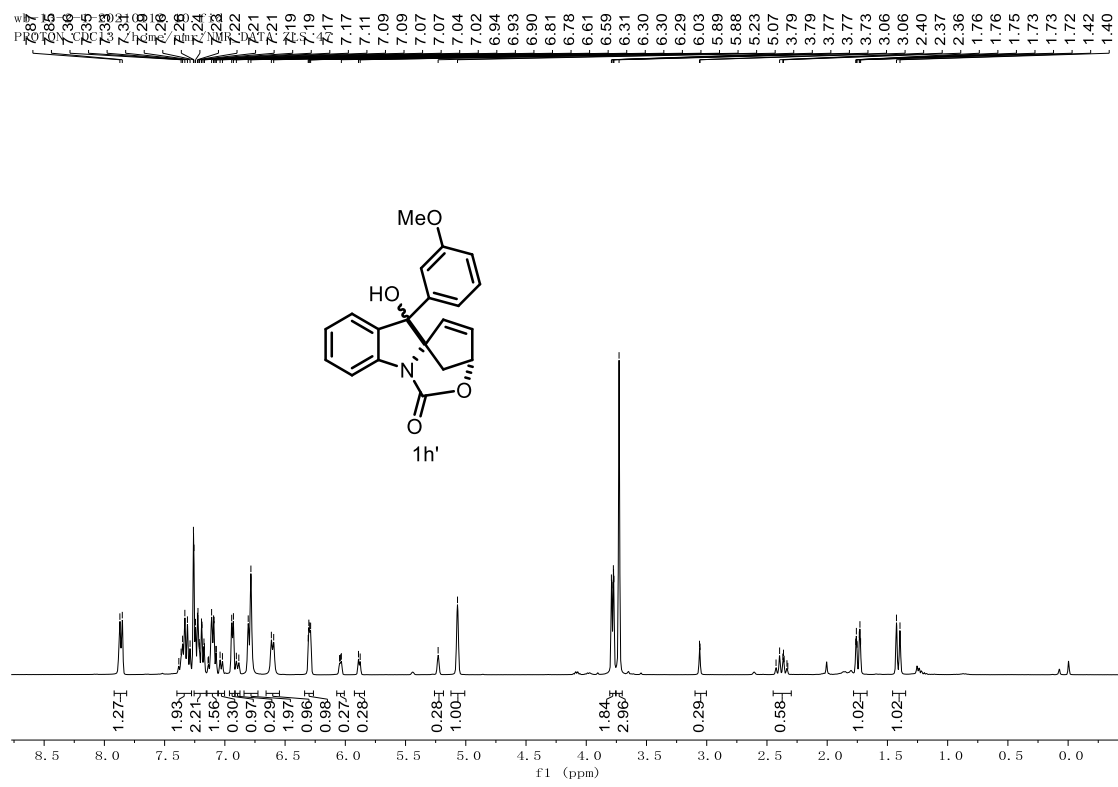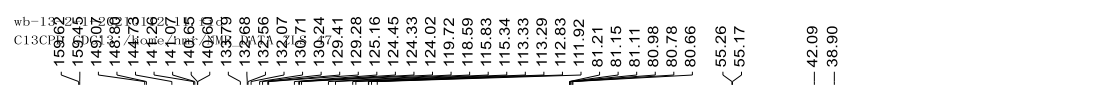

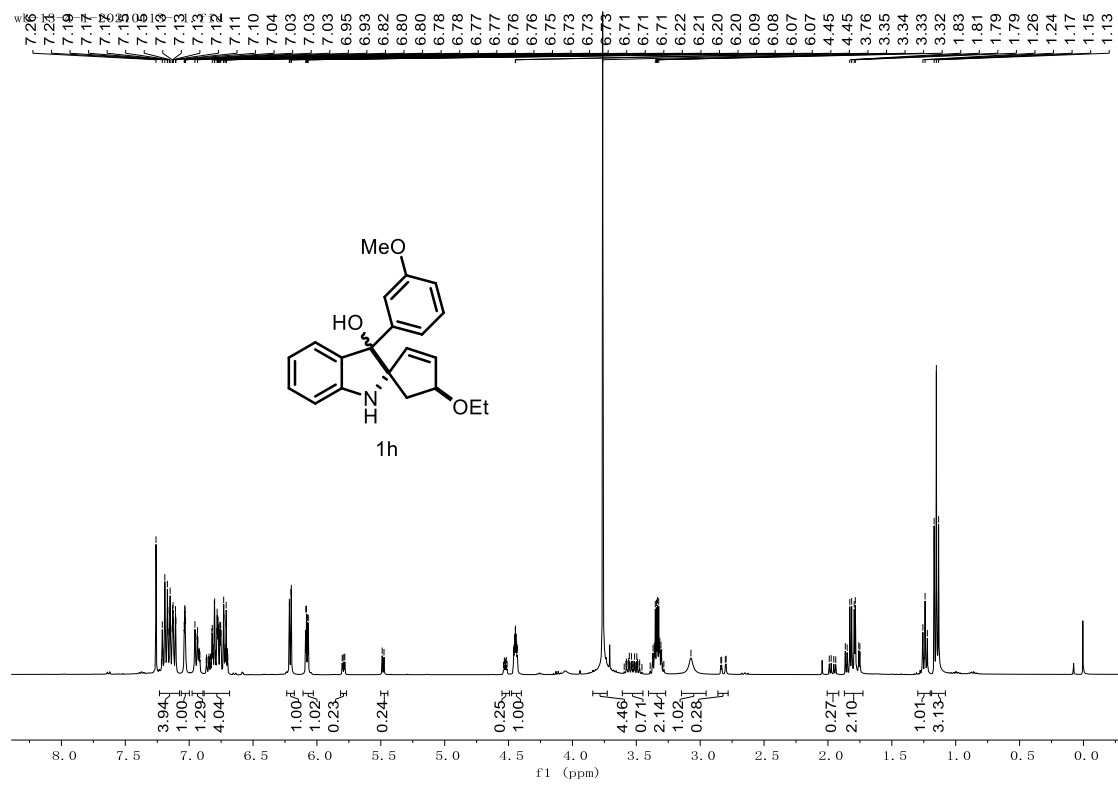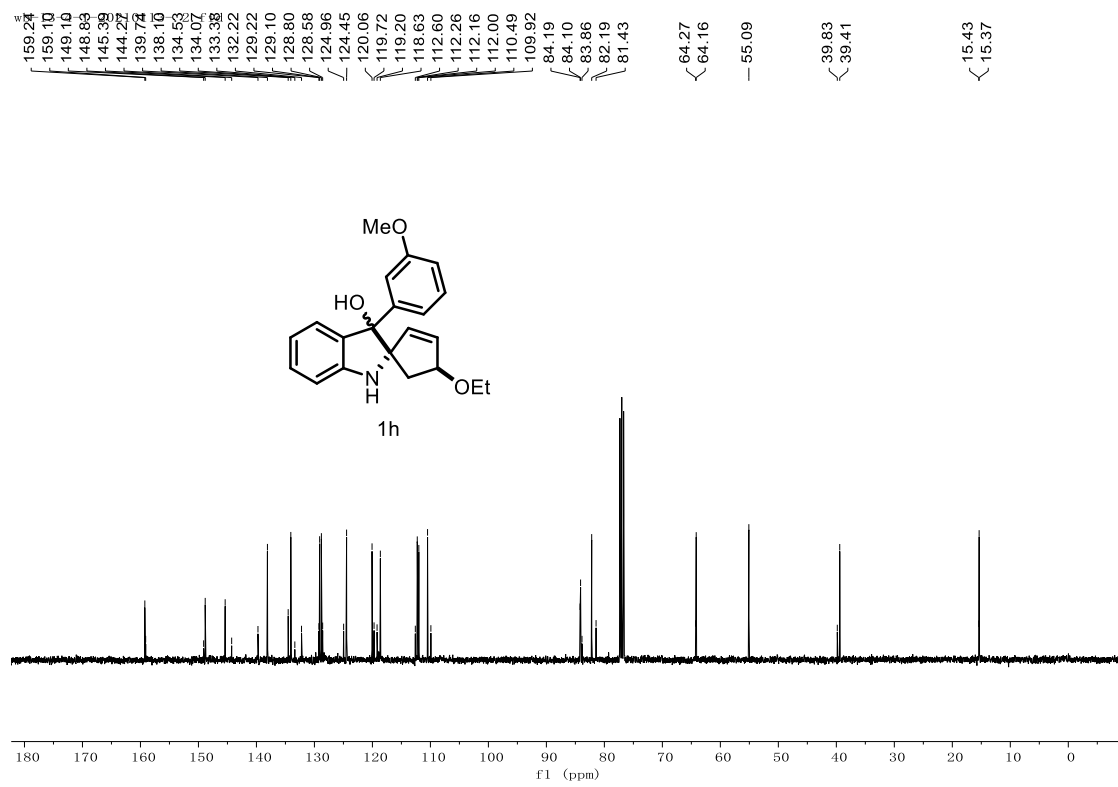

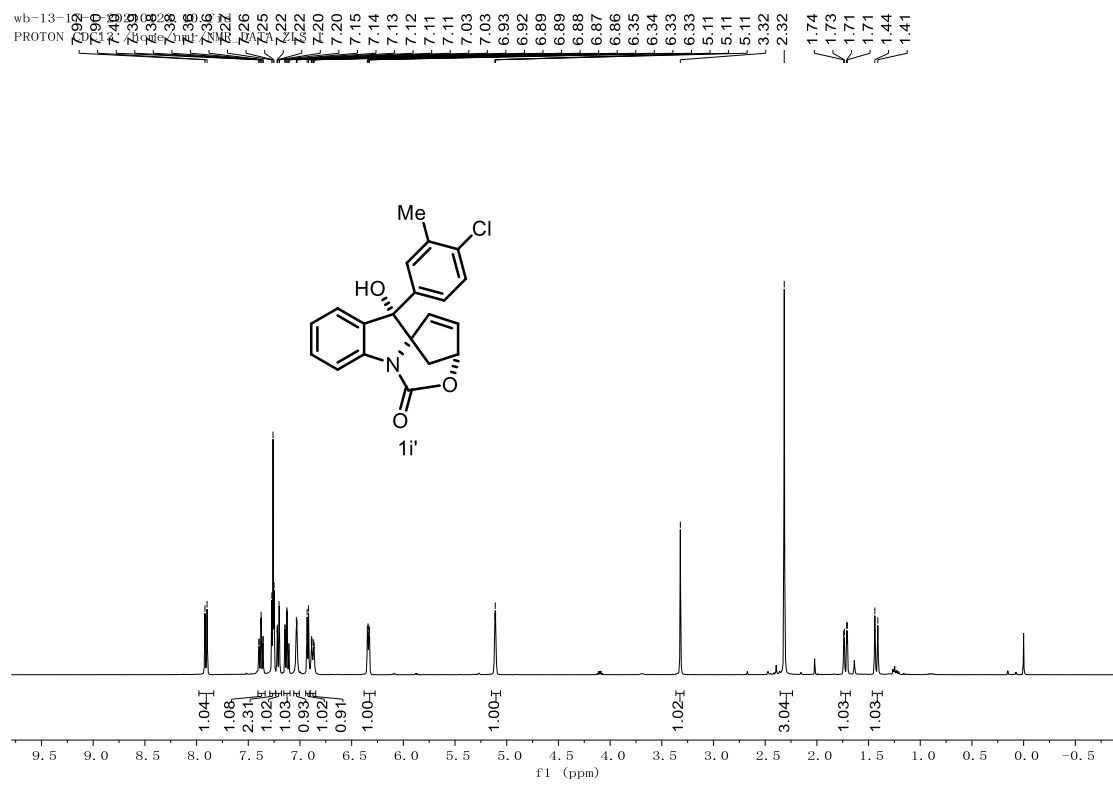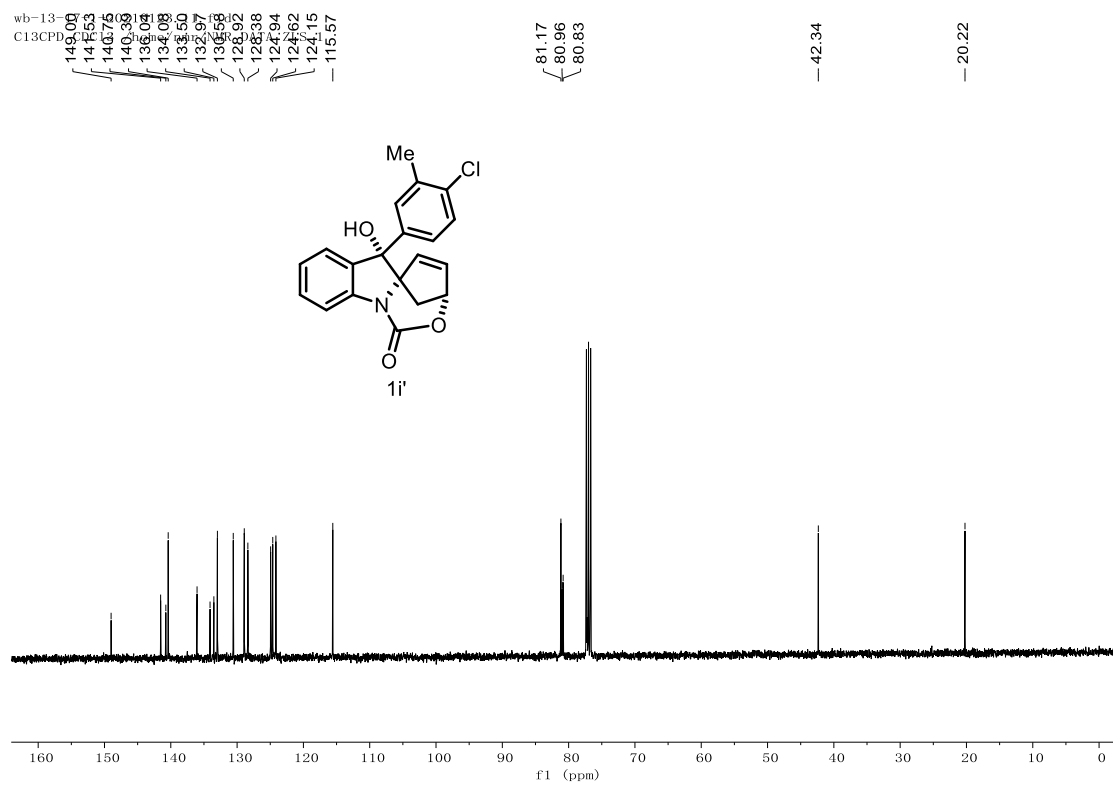

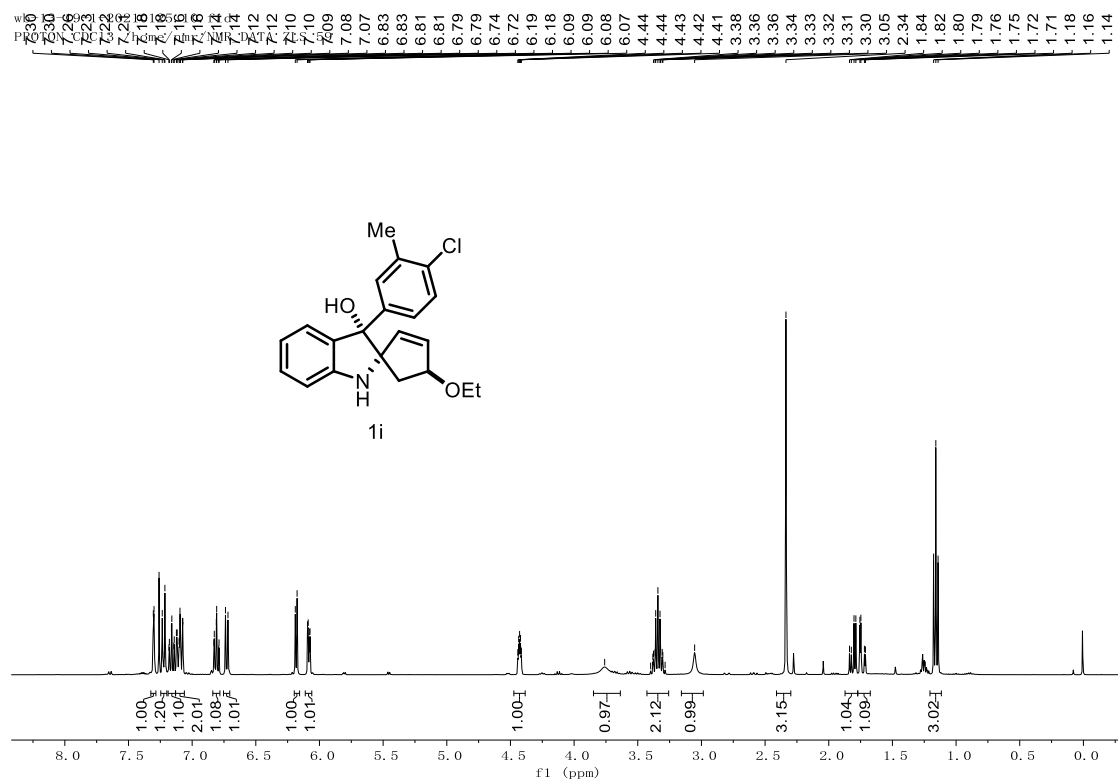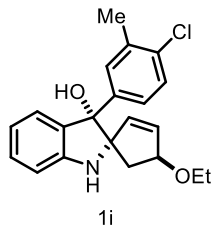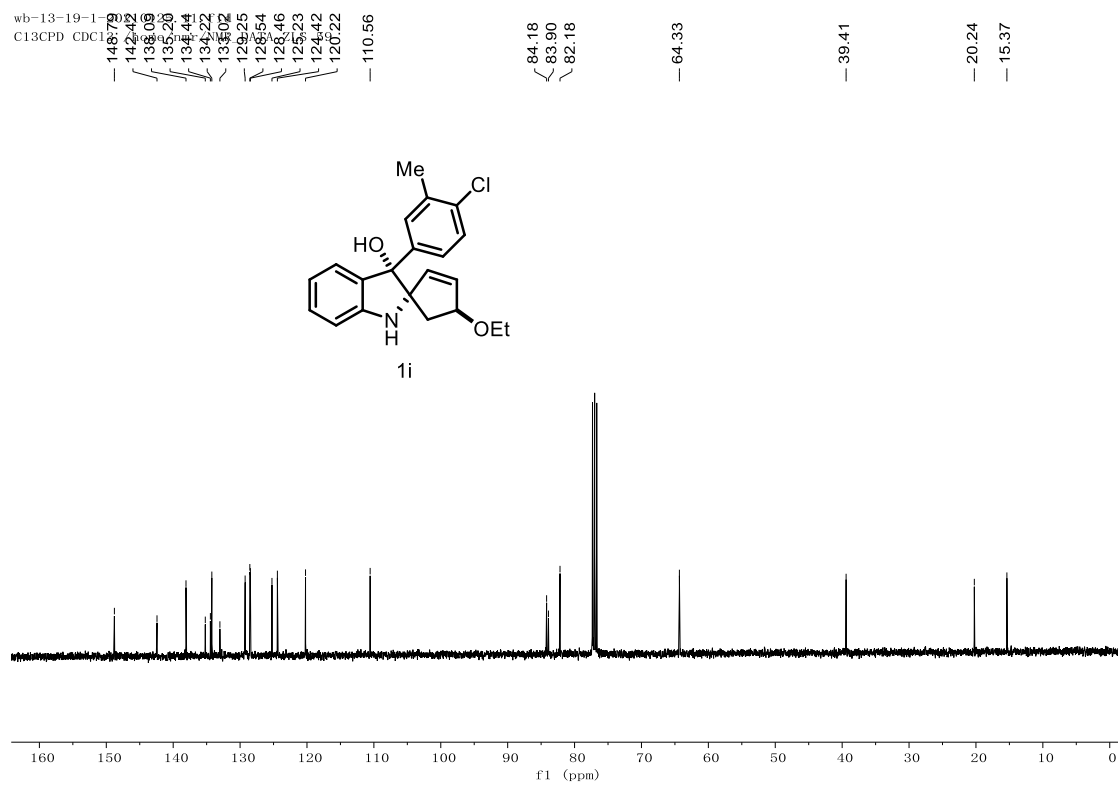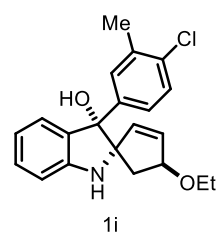



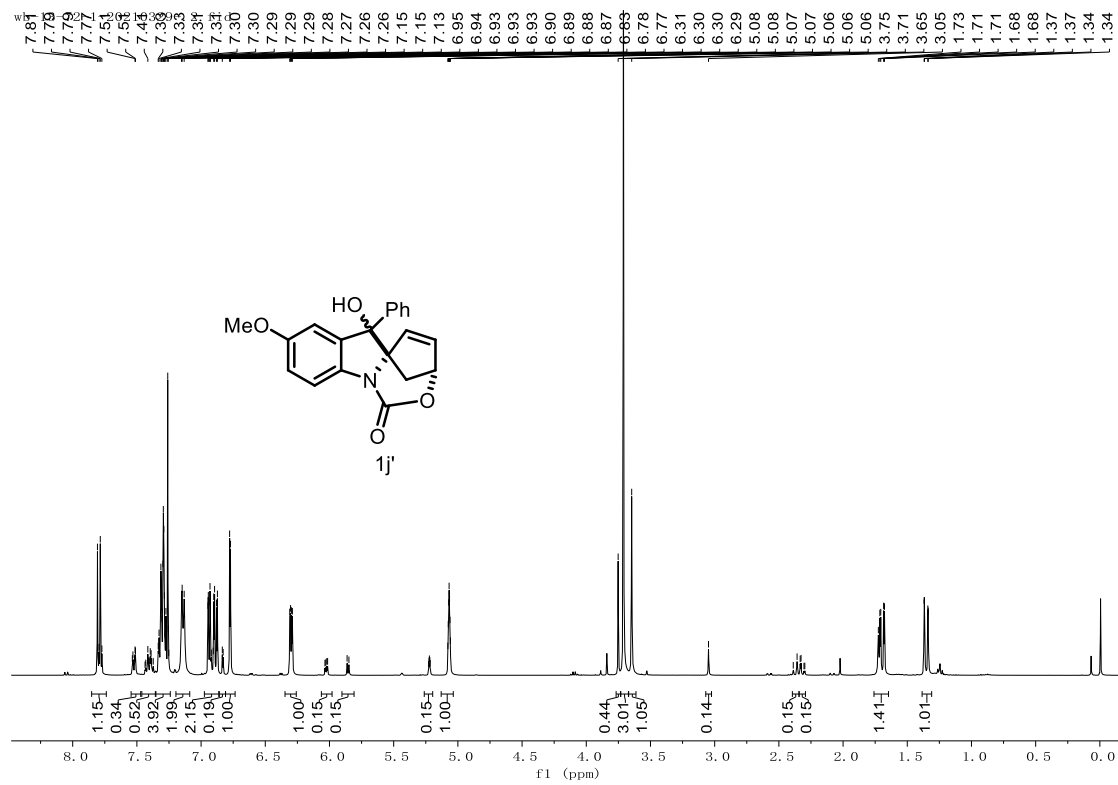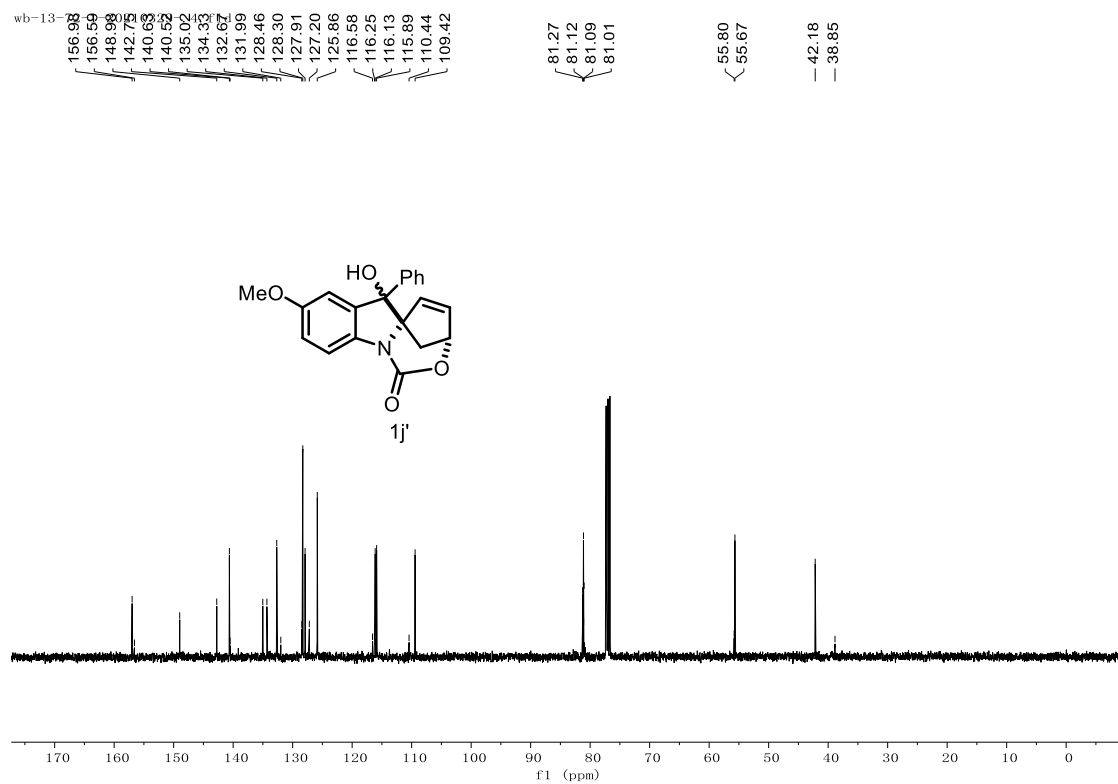

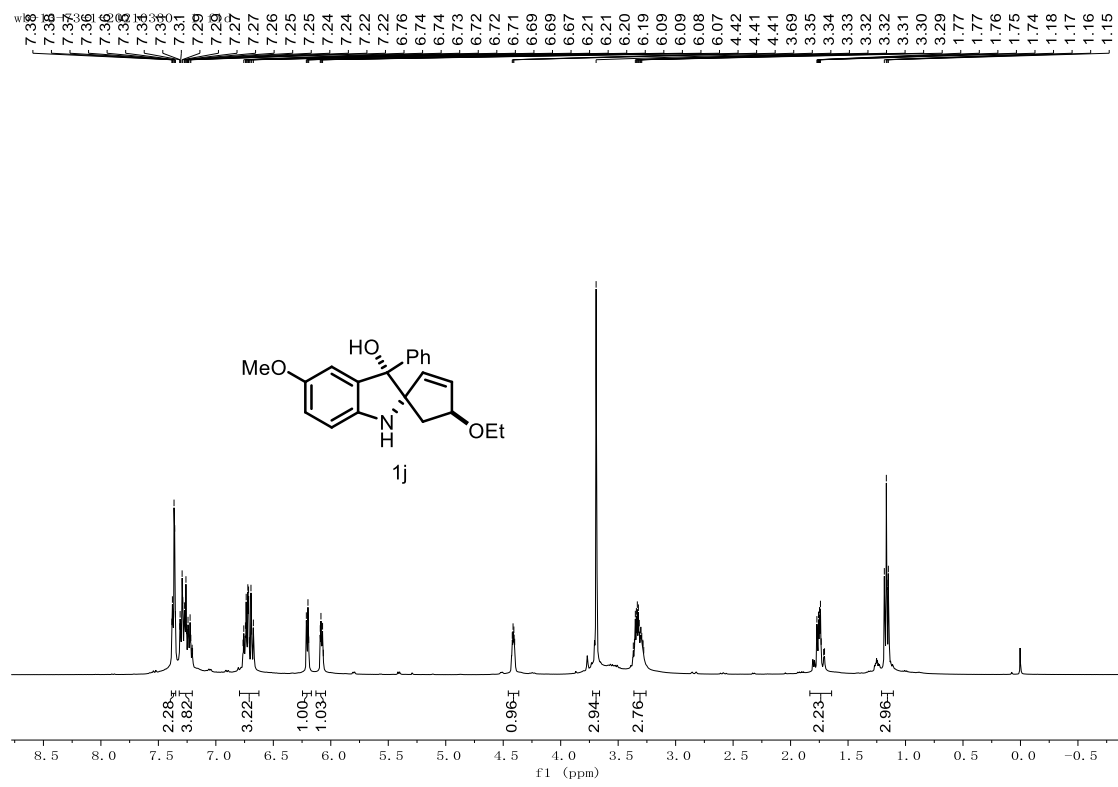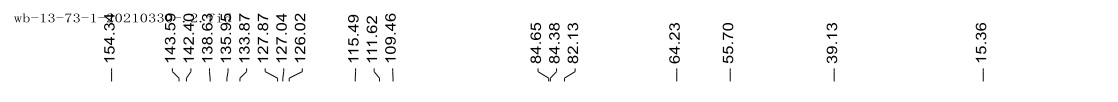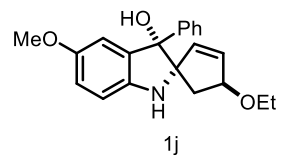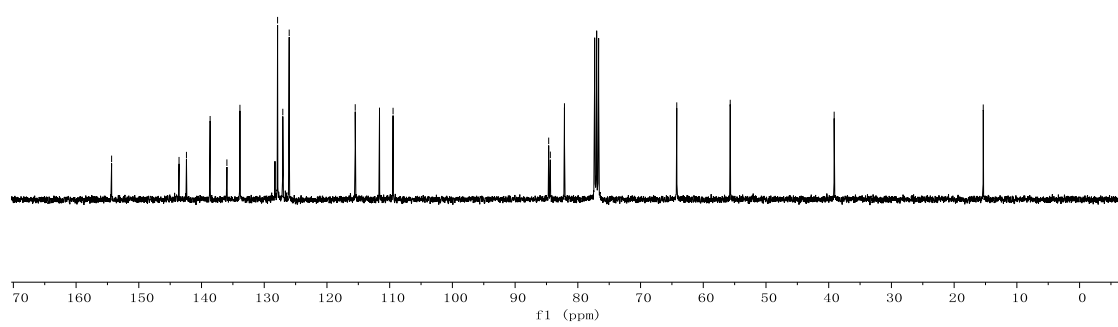

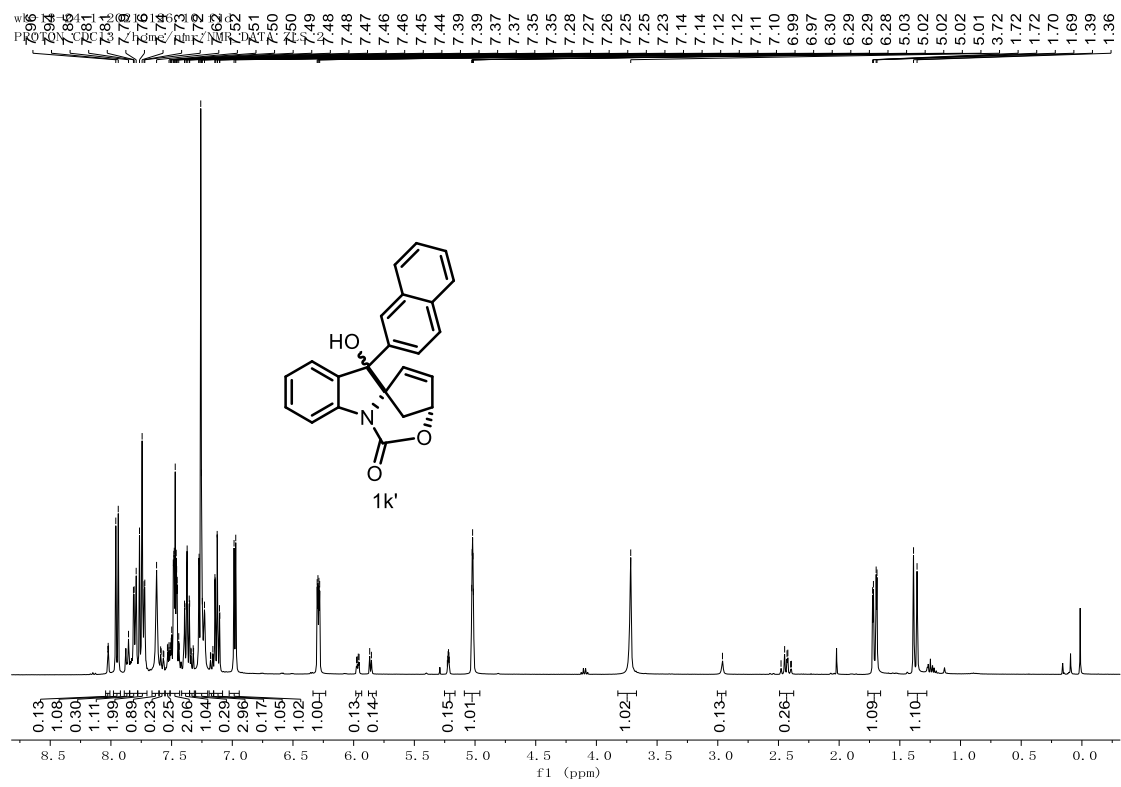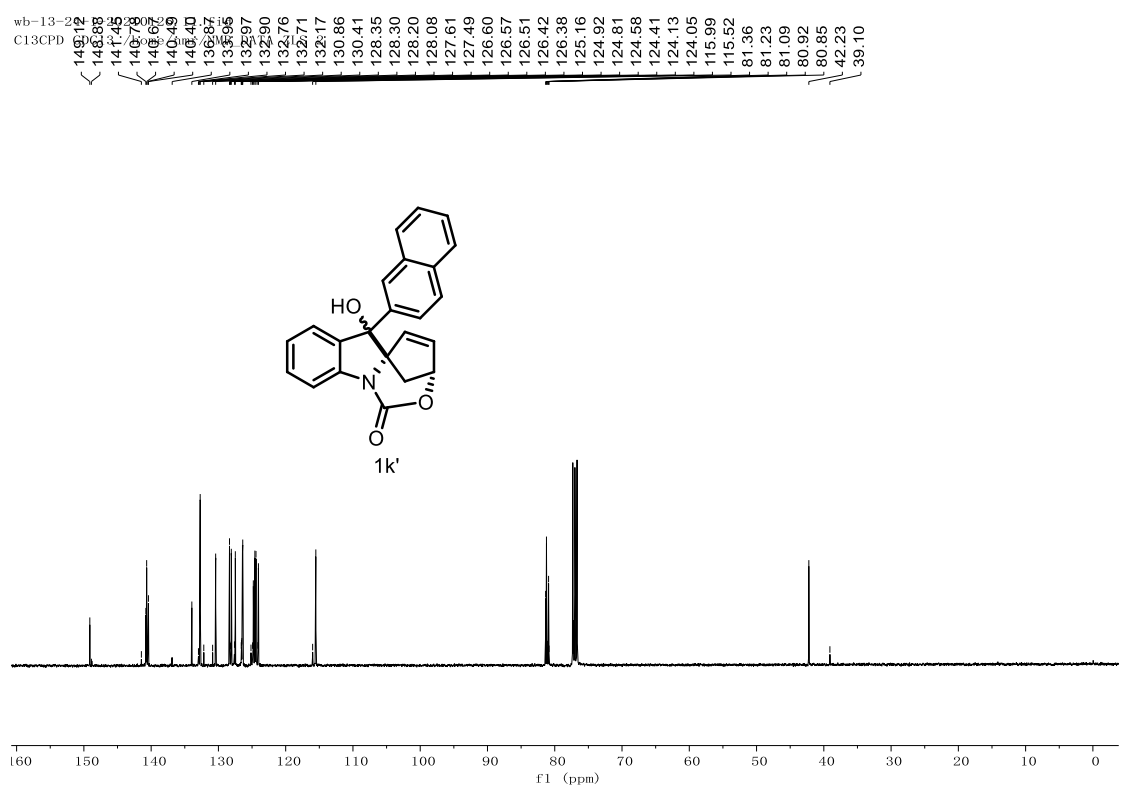

7.596  
7.584  
7.583  
7.582  
7.581  
7.579  
7.578  
7.577  
7.574  
7.572  
7.550  
7.549  
7.548  
7.547  
7.547  
7.547  
7.546  
7.45  
7.45  
7.44  
7.44  
7.22  
7.20  
7.19  
7.18  
7.17  
7.17  
7.15  
7.15  
7.13  
7.13  
7.13  
6.84  
6.84  
6.82  
6.82  
6.80  
6.80  
6.80  
6.78  
6.28  
6.26  
6.10  
6.10  
6.09  
6.08  
4.42  
4.42  
4.41  
4.41  
3.29  
3.28  
3.27  
3.25  
3.23  
1.83  
1.82  
1.80  
1.79  
1.26  
1.12  
1.10  
1.08

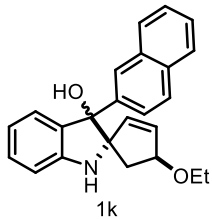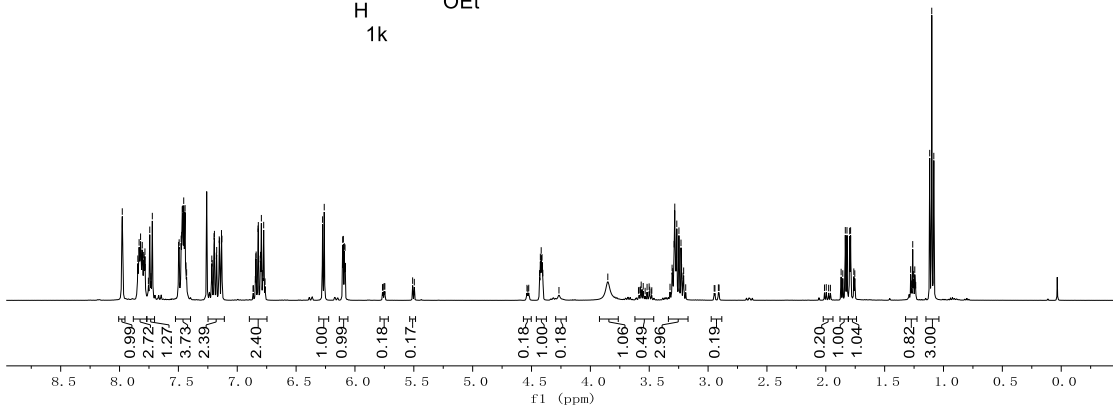

wb-13  
C13CPD  
149.17  
148.89  
141.60  
140.42  
138.93  
138.26  
134.64  
133.95  
133.65  
133.00  
132.94  
132.75  
132.59  
132.32  
129.29  
129.19  
128.57  
128.39  
128.36  
127.96  
127.91  
127.50  
127.47  
127.35  
127.32  
127.18  
126.25  
126.13  
126.06  
125.90  
125.75  
125.68  
125.24  
125.06  
125.01  
124.63  
124.10  
123.28  
120.57  
120.14  
119.78  
110.53  
109.96  
84.38  
84.23  
84.05  
82.22  
81.39  
64.30  
40.13  
39.43  
15.42  
15.25

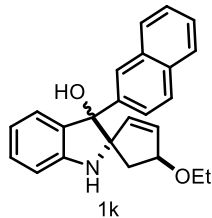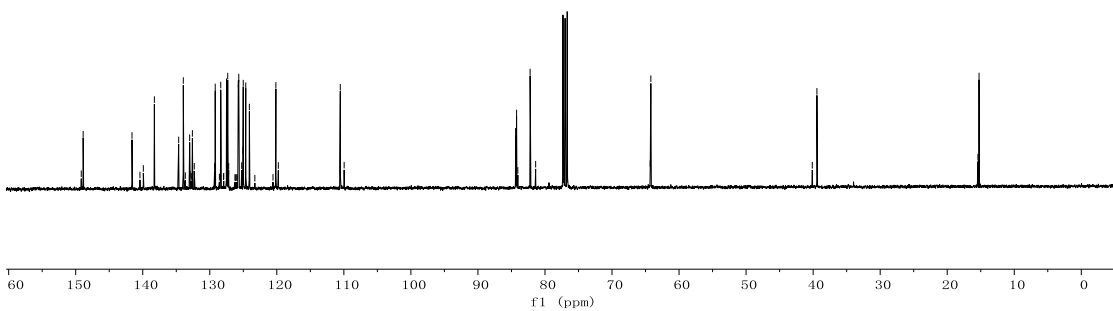

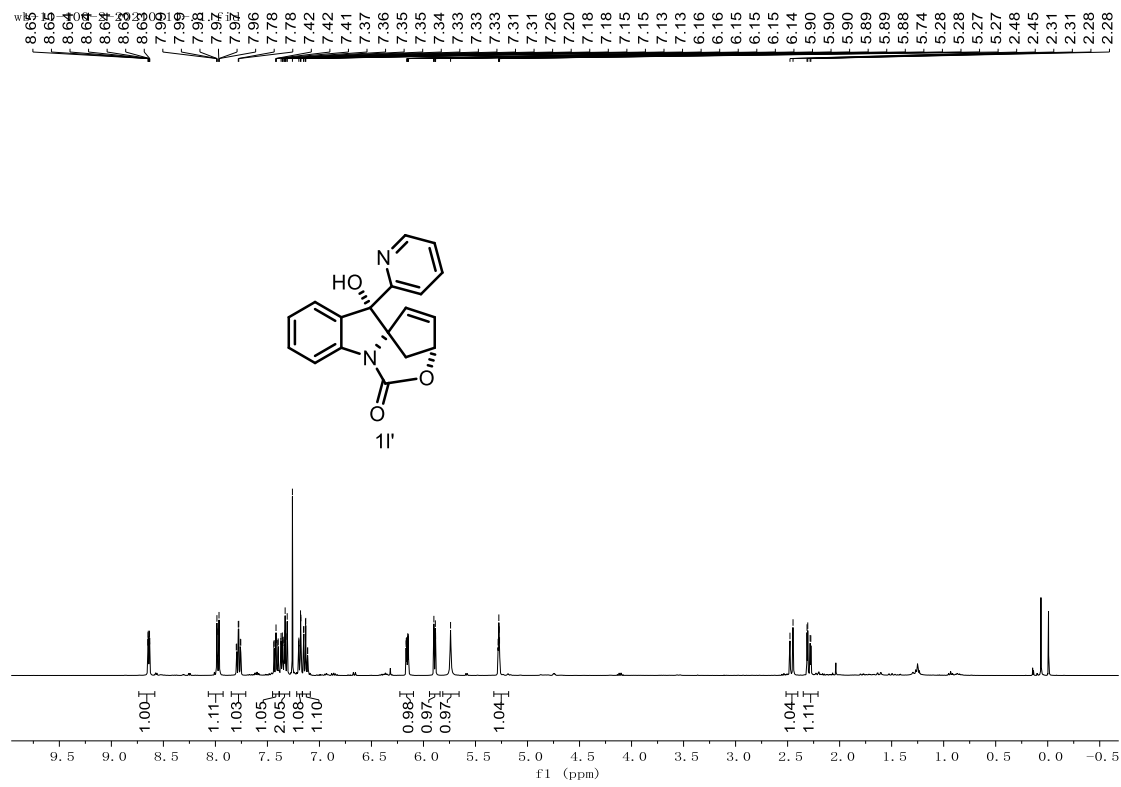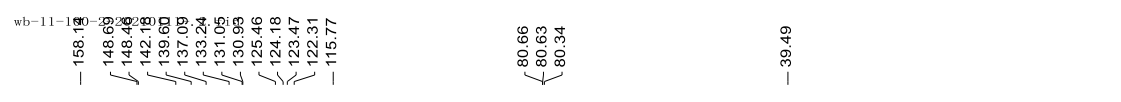

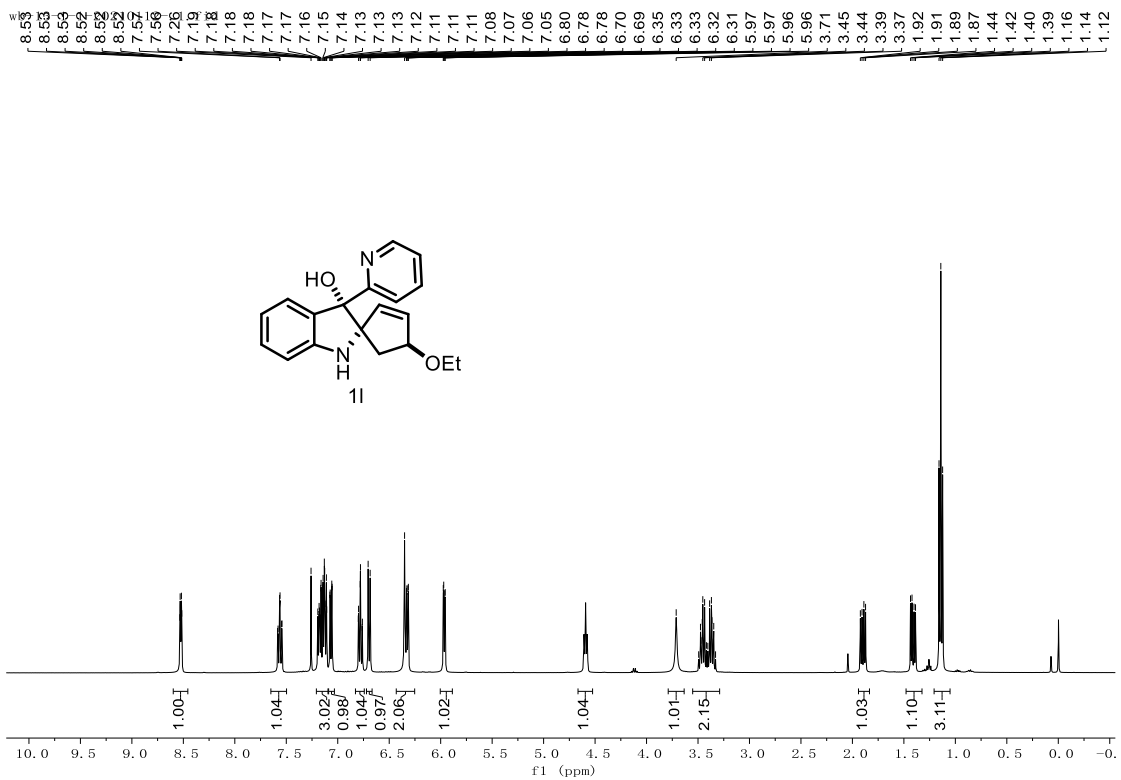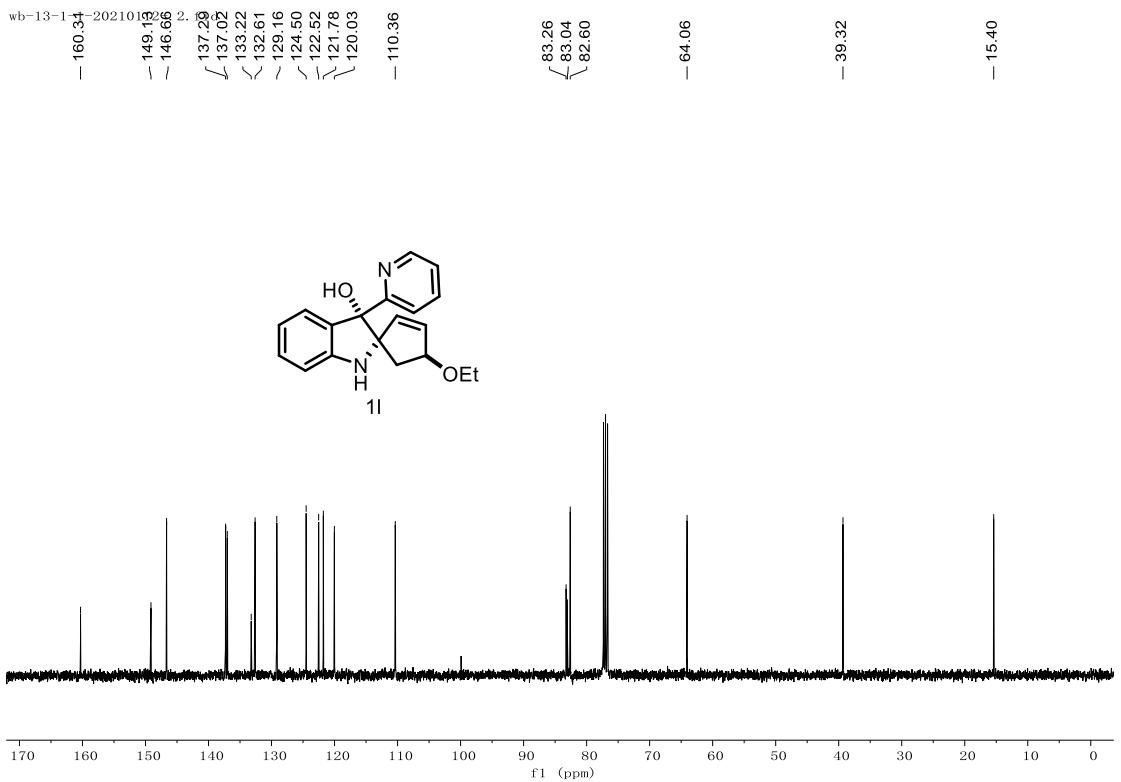



wb-13-18  
PROJID: 7331  
7331  
726  
725  
723  
719  
718  
714  
712  
711  
683  
683  
681  
681  
679  
670  
668  
631  
631  
631  
617  
615  
611  
610  
609  
609  
449  
448  
448  
344  
342  
341  
318  
  
207  
206  
203  
203  
194  
193  
191  
189  
120  
118  
117

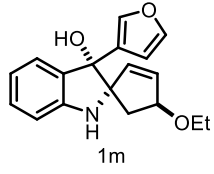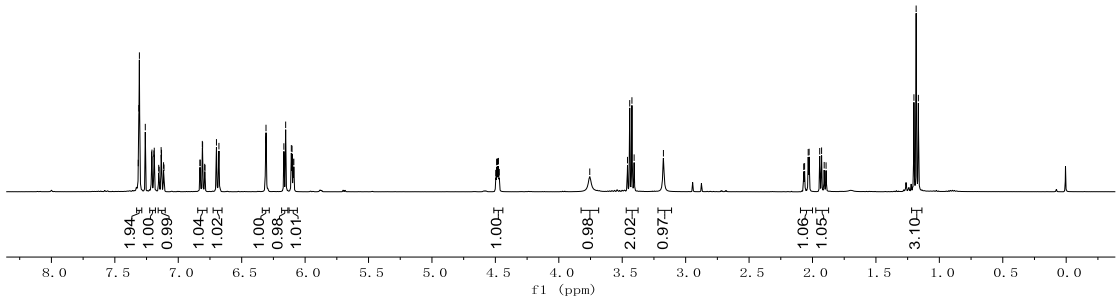

wb-13-18  
C13CPD CD  
148539  
14295  
13912  
13808  
13722  
13569  
12993  
12811  
12409  
11697  
ZLS 3  
11050  
10958  
  
83.82  
82.12  
80.82  
  
64.26  
  
39.50  
  
15.43

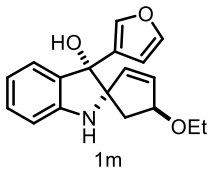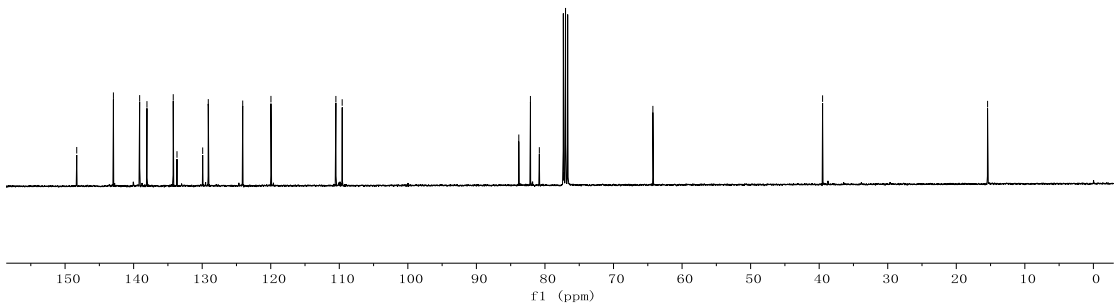



wb-11-81  
 8.1  
 8.0  
 7.9  
 7.8  
 7.7  
 7.6  
 7.5  
 7.4  
 7.3  
 7.3  
 7.3  
 7.3  
 7.2  
 7.0

3.2  
 3.2  
 1.9  
 1.9  
 1.9  
 1.8  
 1.8  
 1.8  
 1.8  
 1.8  
 1.8  
 1.6  
 1.6  
 1.5  
 1.5  
 1.0  
 1.0

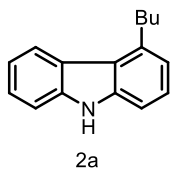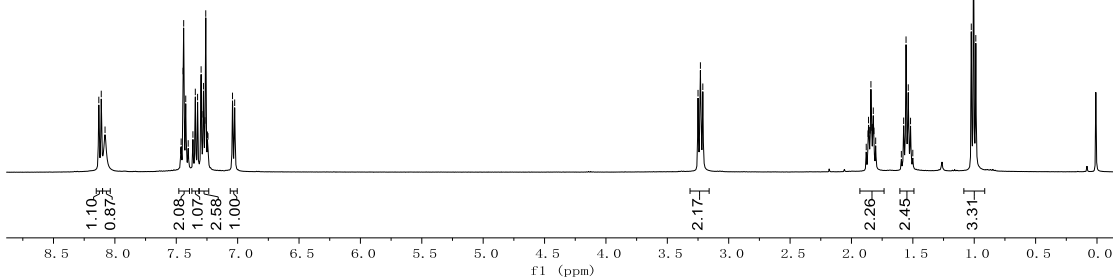

wb-11-81  
 139.8  
 139.4  
 138.8  
 125.9  
 125.9  
 123.2  
 122.6  
 121.2  
 120.1  
 119.4  
 110.4  
 108.1

34.2  
 31.9  
 22.9  
 14.1

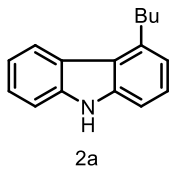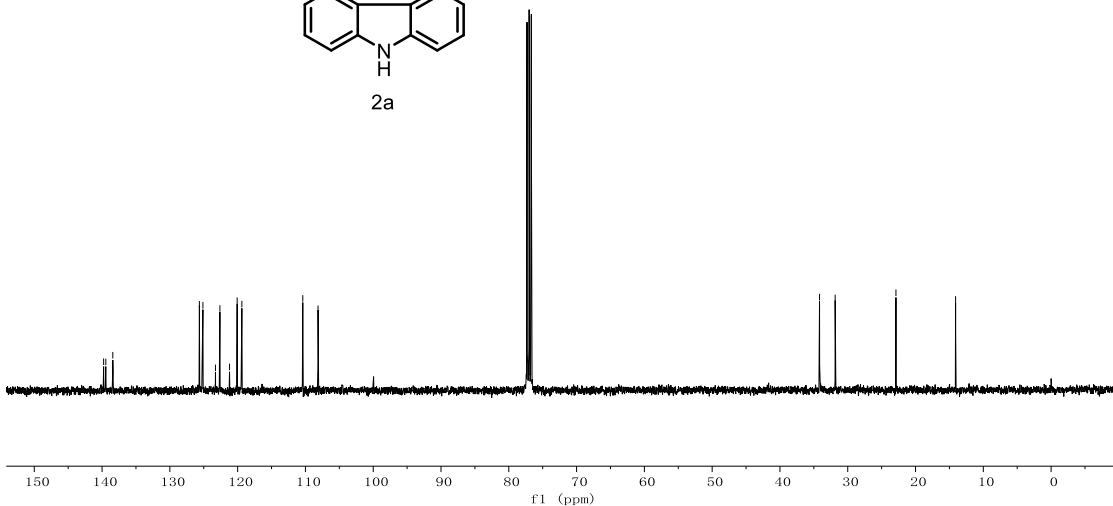

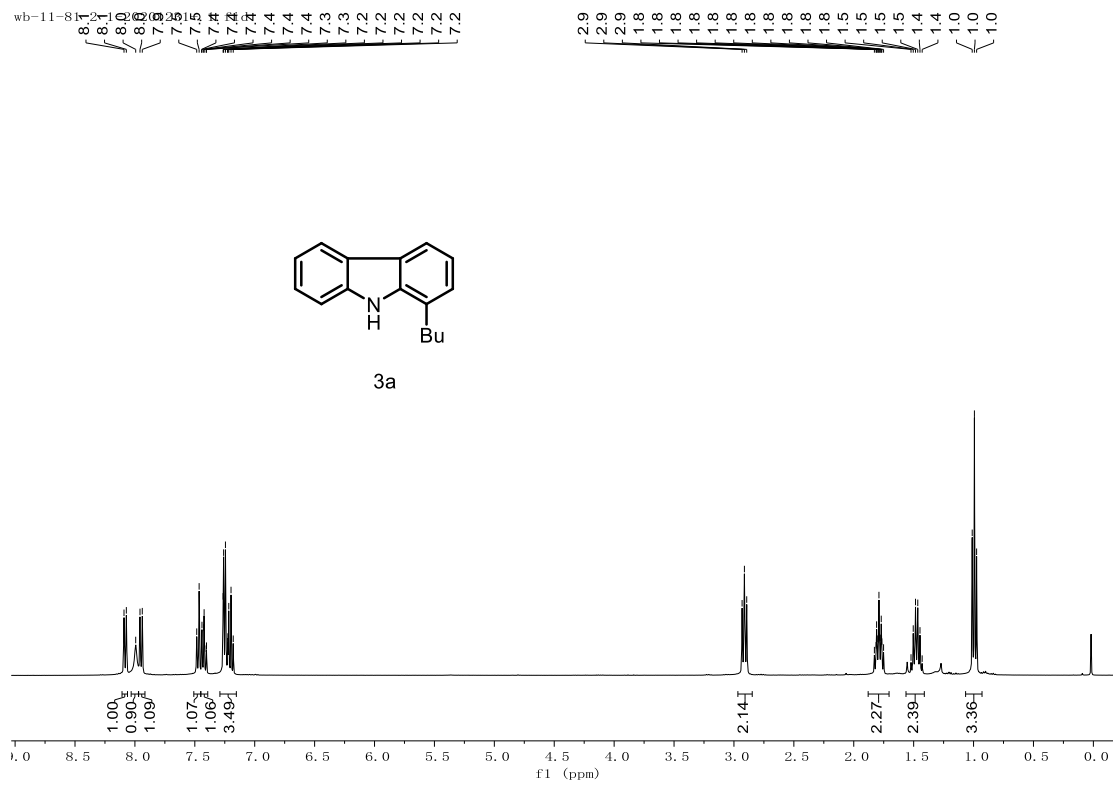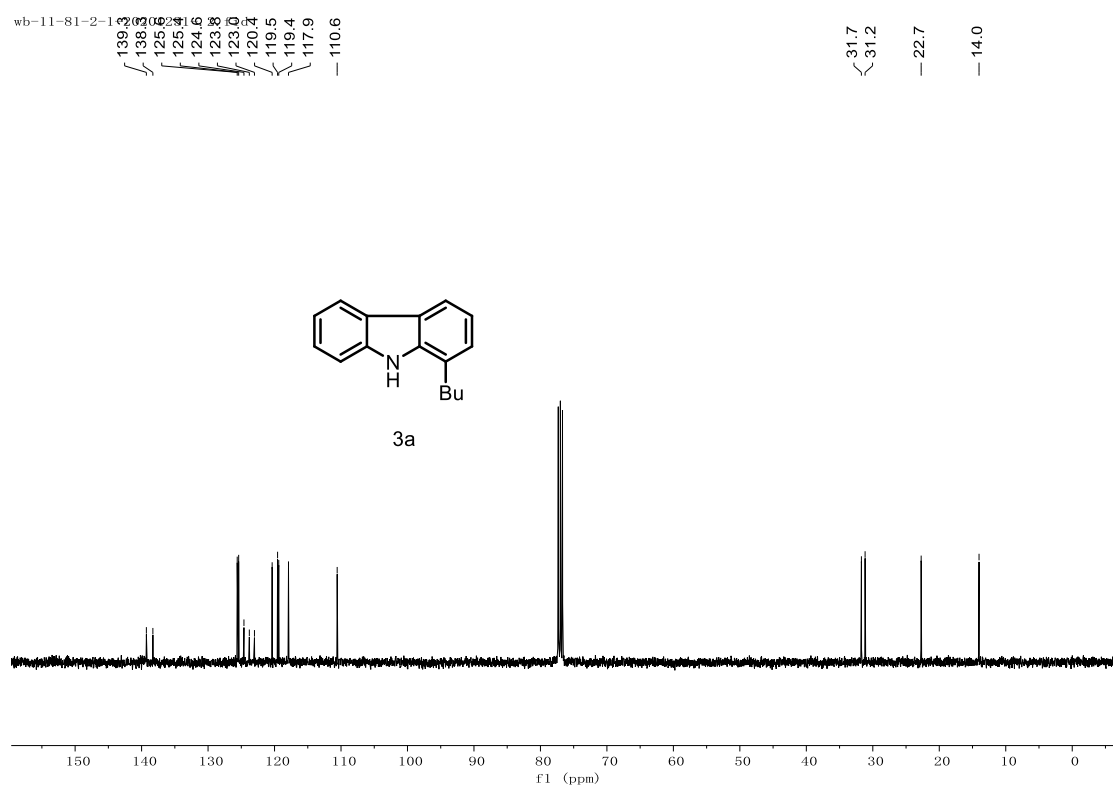

wb-13-30-11-20211029  
8.08  
8.08  
7.5  
7.5  
7.4  
7.4  
7.4  
7.4  
7.4  
7.4  
7.3  
7.3  
7.3  
7.3  
7.3  
7.3  
7.2  
7.2  
7.1  
7.1

3.3  
3.3  
3.3

1.5  
1.5

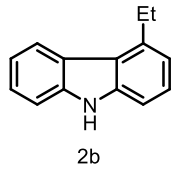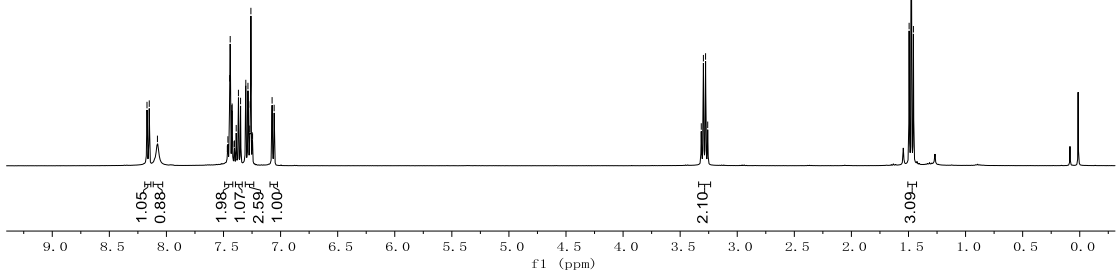

wb-13-30-11-20211029  
139.2  
138.5  
125.1  
125.1  
123.3  
122.7  
121.7  
119.4  
119.0  
110.4  
108.2

27.3  
14.1

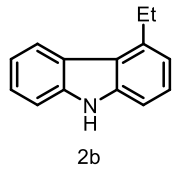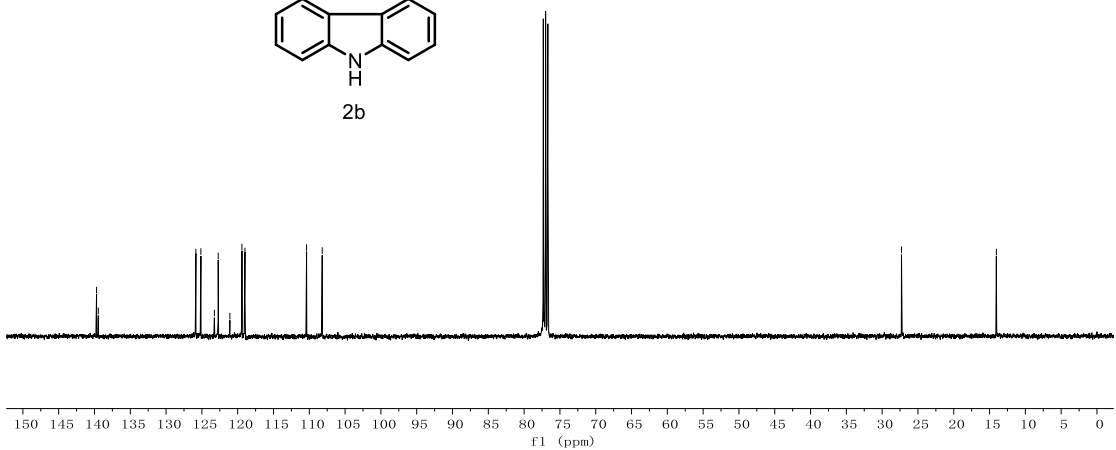

wb-13-30-222-2021091915  
 PROTON CDCl3 / 8.3, 8.0, 7.9, 7.5, 7.4, 7.4, 7.4, 7.3, 7.3, 7.2, 7.2, 7.2, 7.2

3.0  
 3.0  
 2.9

1.4  
 1.4  
 1.4

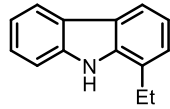

3b

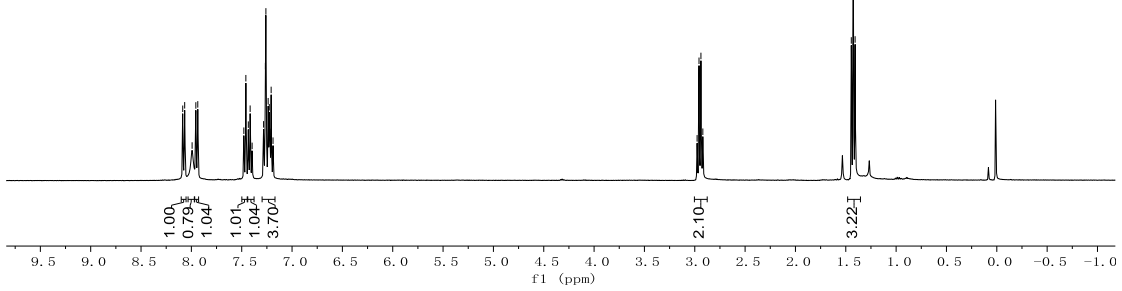

wb-13-30-222-2021091915  
 C13CPD CDCl3 / 138.4, 138.2, 126.0, 125.9, 125.9, 123.0, 123.0, 120.4, 119.7, 119.4, 117.9, 110.6

24.2

13.8

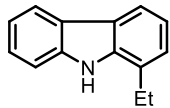

3b

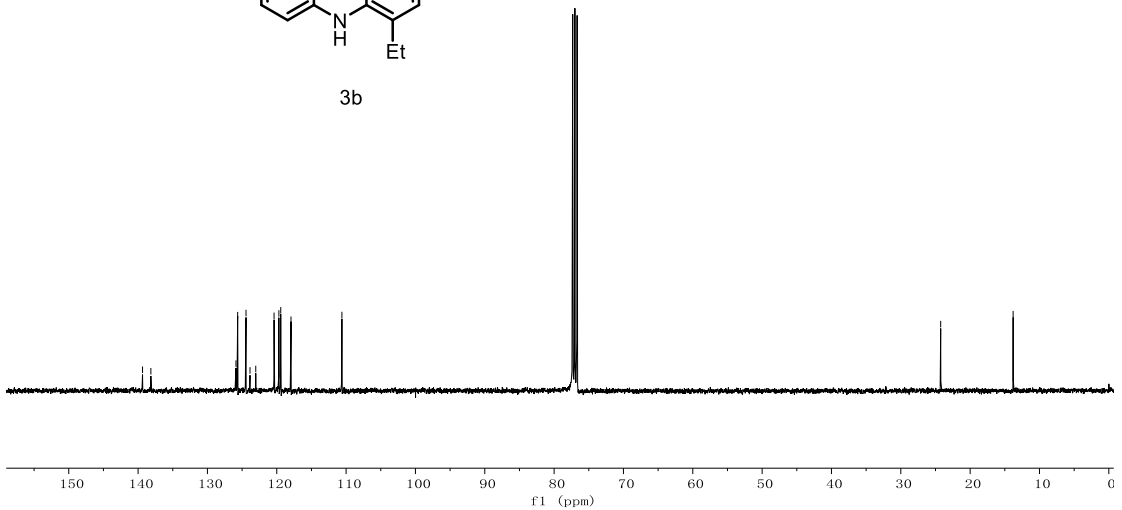

wb-13-92-1-11

7.90  
7.89  
7.87  
7.54  
7.52  
7.37  
7.35  
7.26  
7.23  
7.21  
7.18  
7.16  
7.14  
7.07  
7.06  
7.05  
7.04

3.93

2.88  
2.86  
2.84

1.87  
1.85  
1.83  
1.81  
1.79  
1.78

1.06  
1.04  
1.02

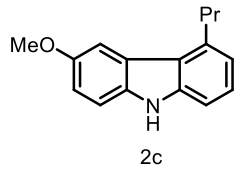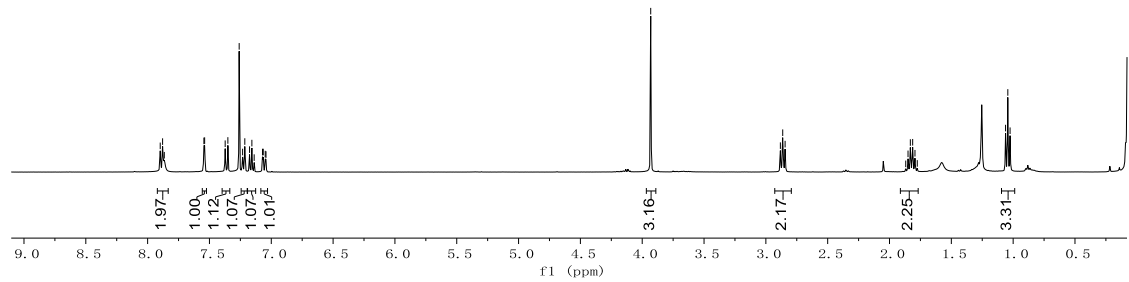

wb-13-92-1-11-202104192.fid

153.82  
139.18  
134.20  
125.42  
124.57  
124.24  
123.05  
119.16  
117.87  
114.86  
111.30  
103.13

56.04

33.48

22.71

14.19

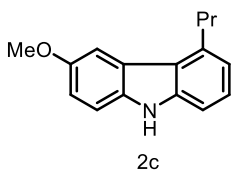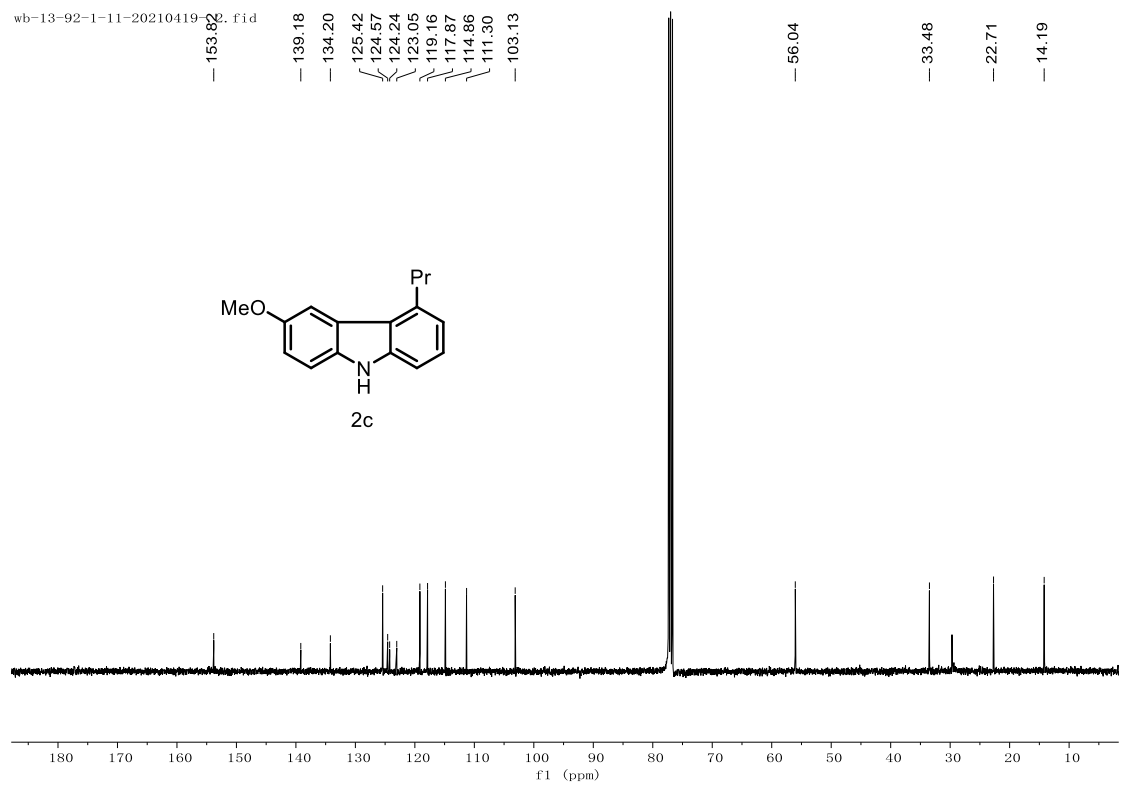

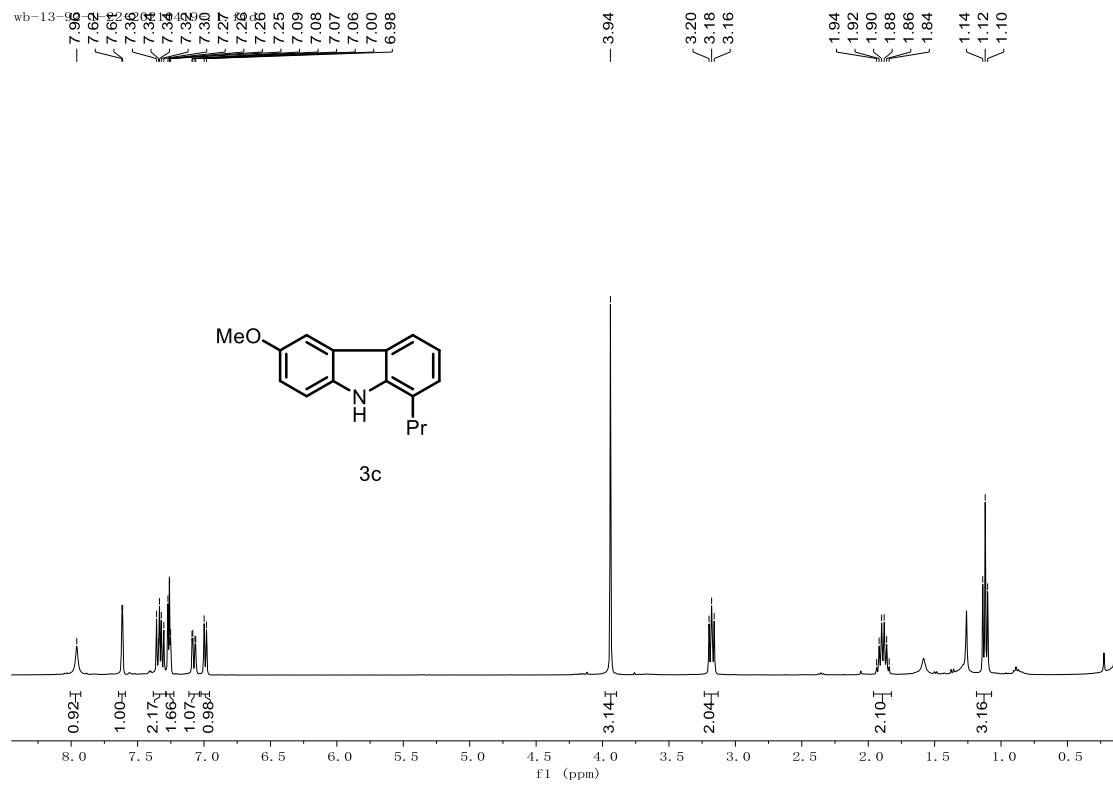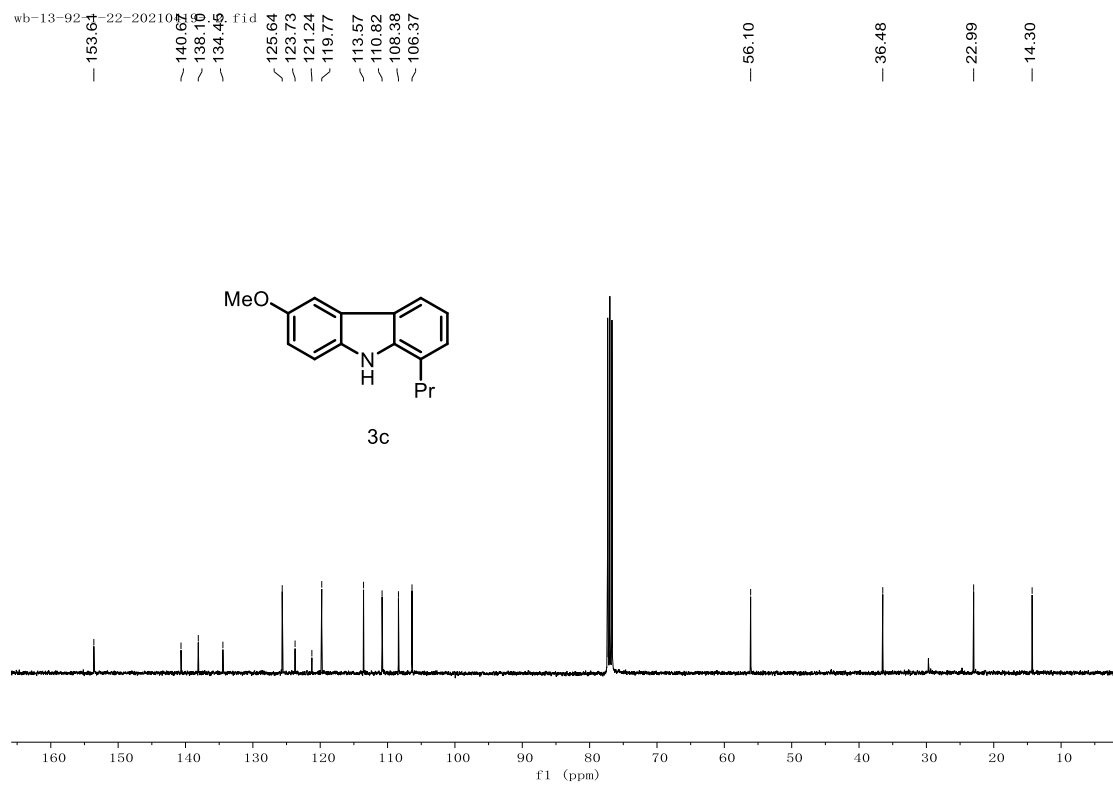

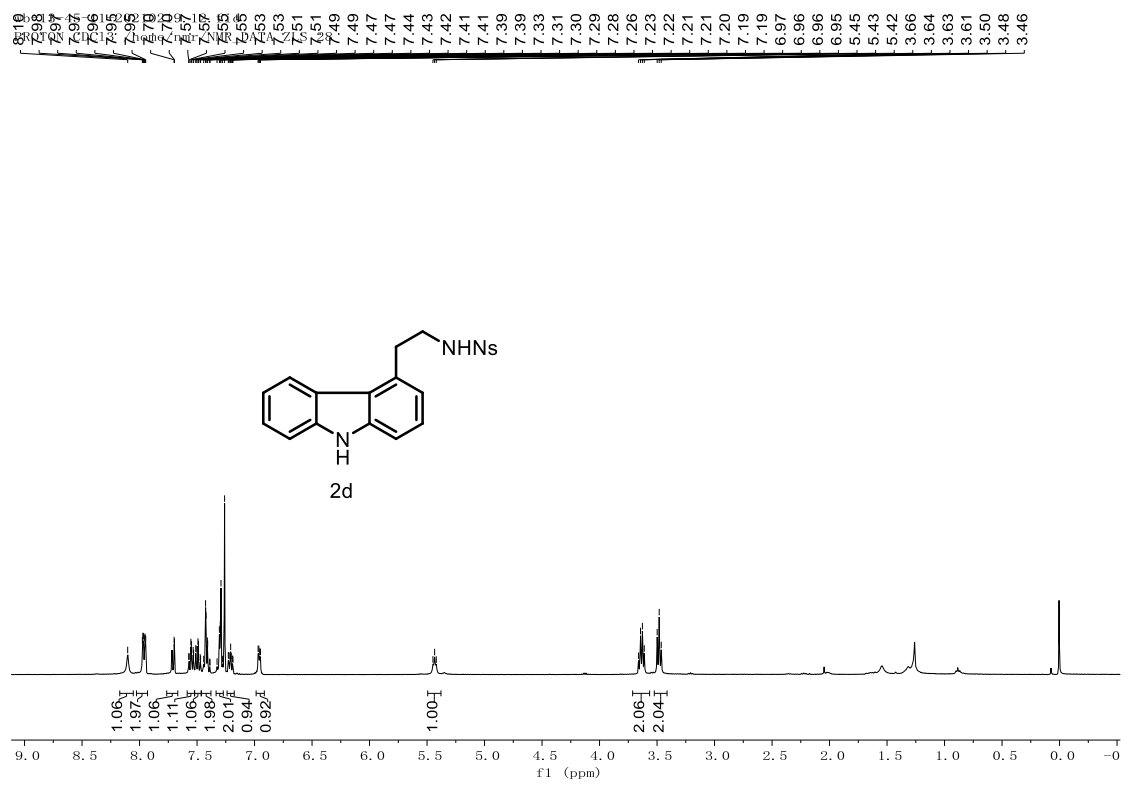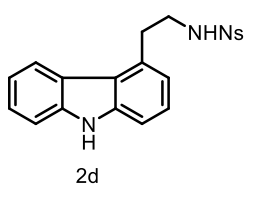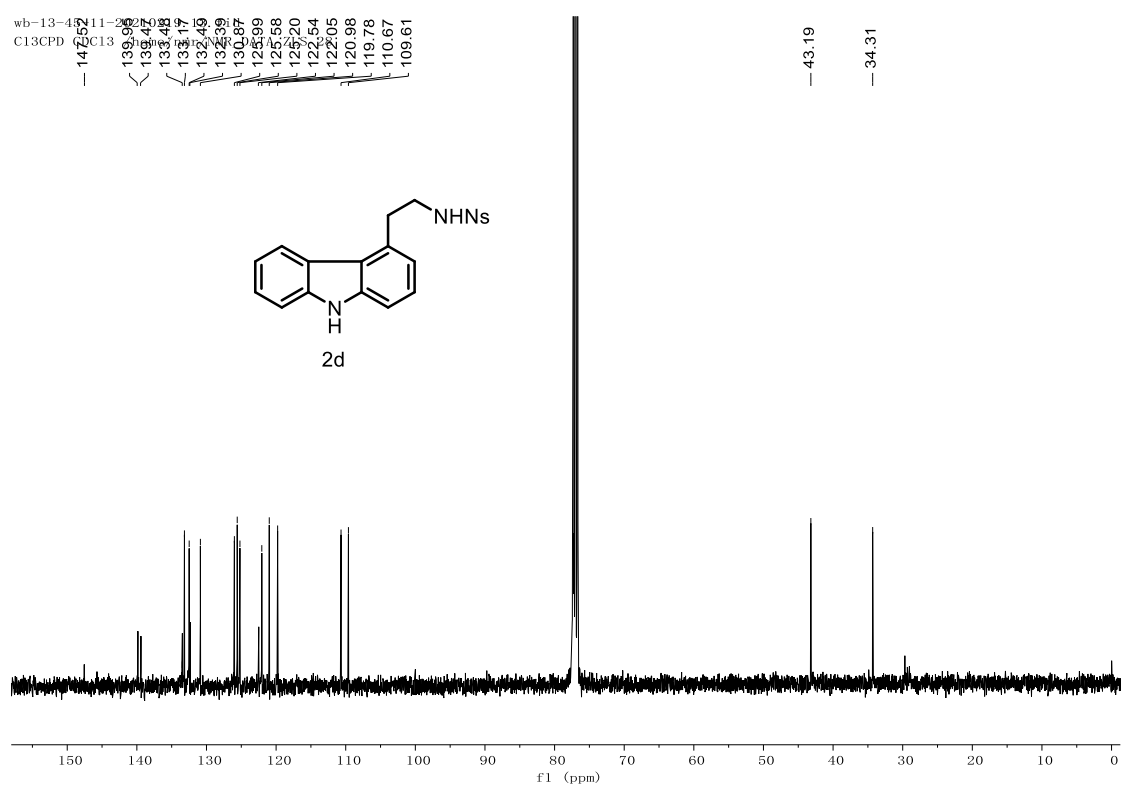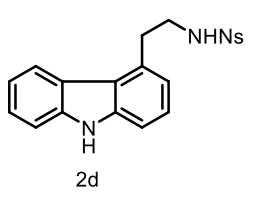

wb-13-45-2-2  
 PROTON CDCl<sub>3</sub>

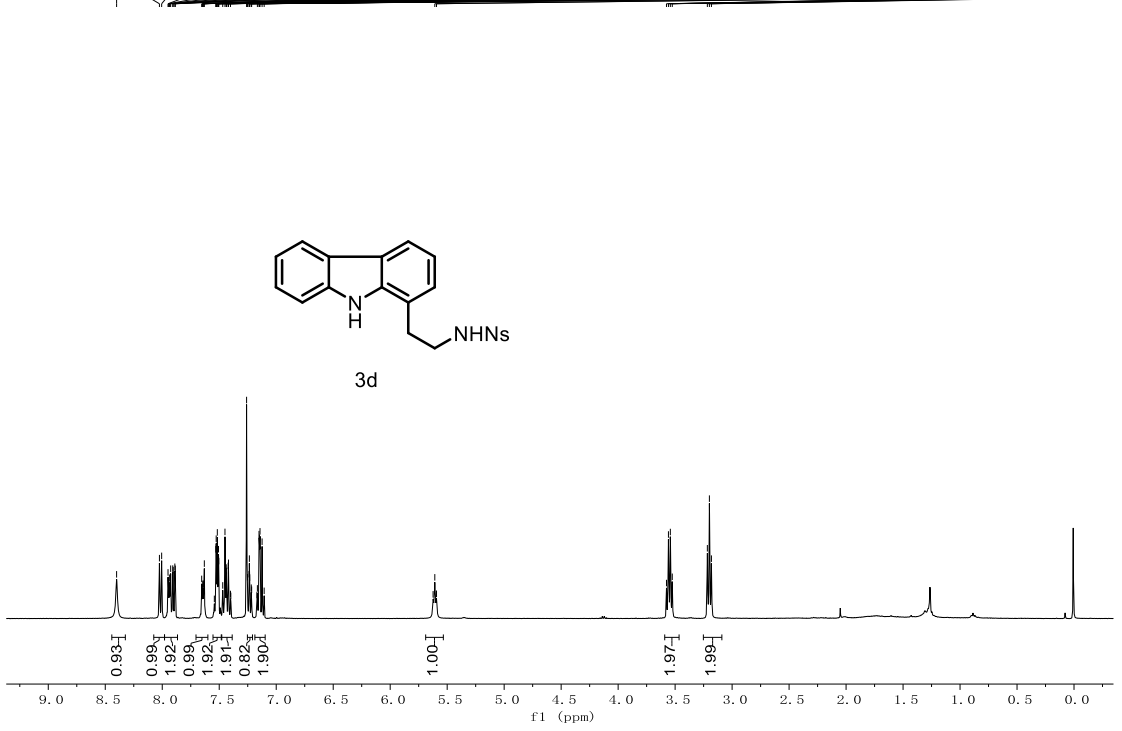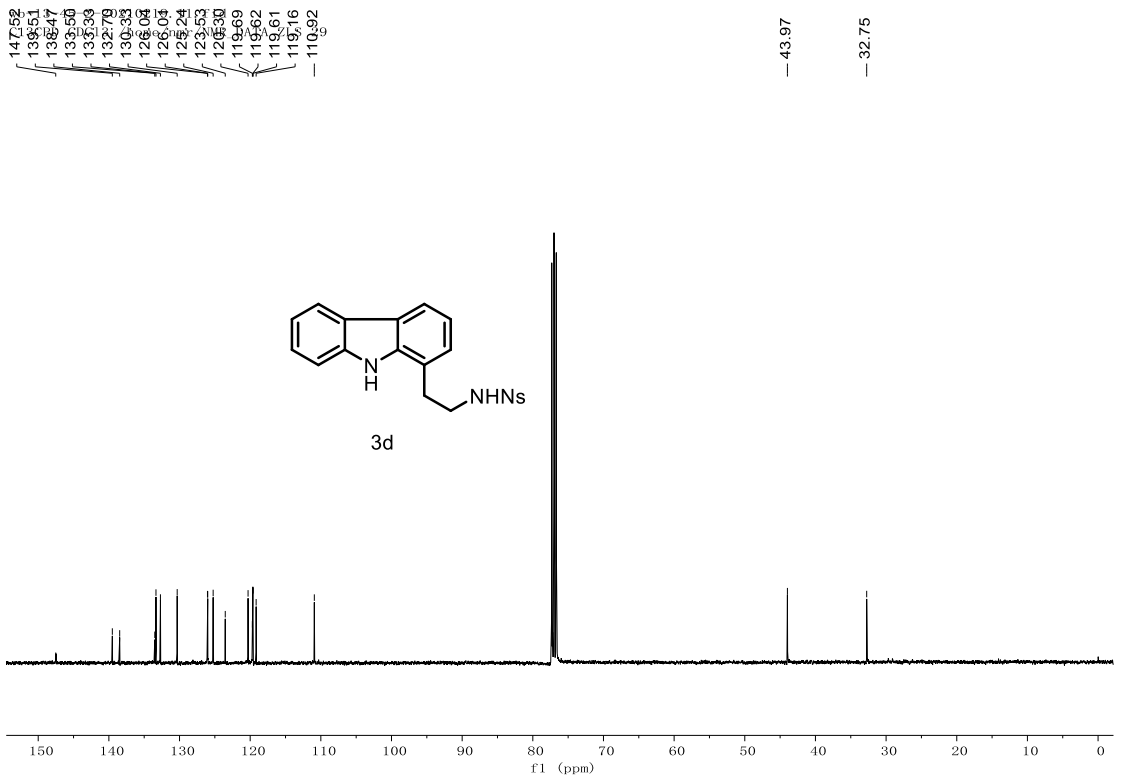



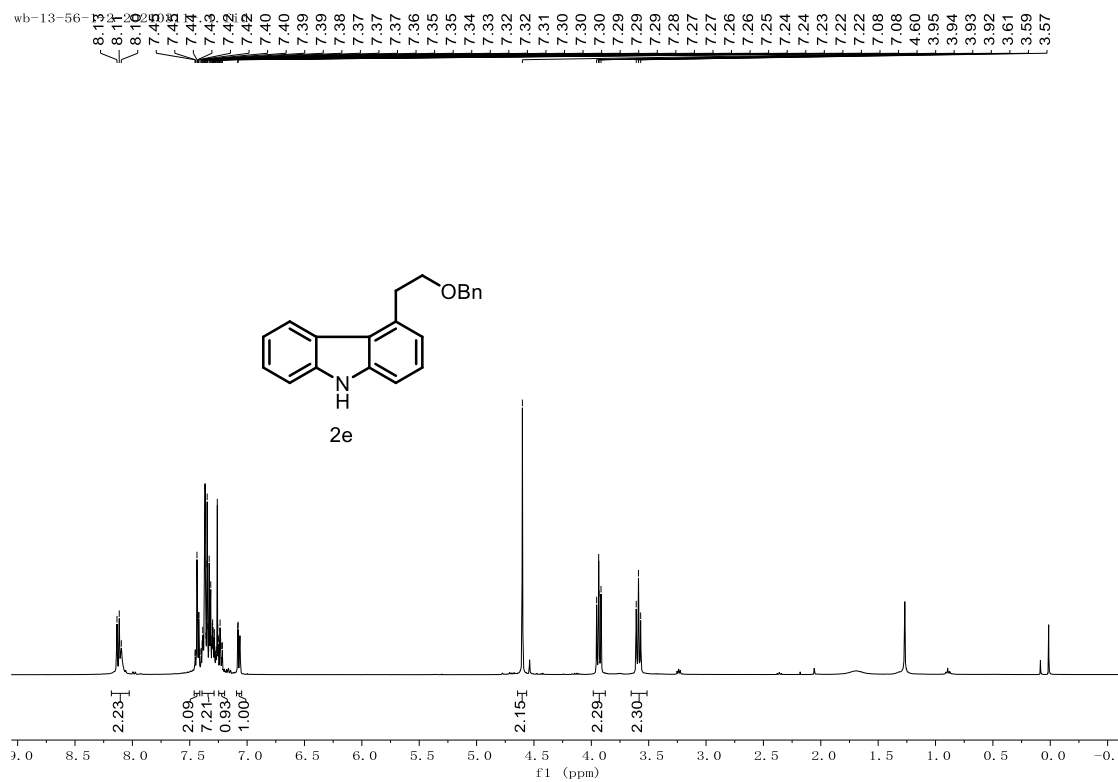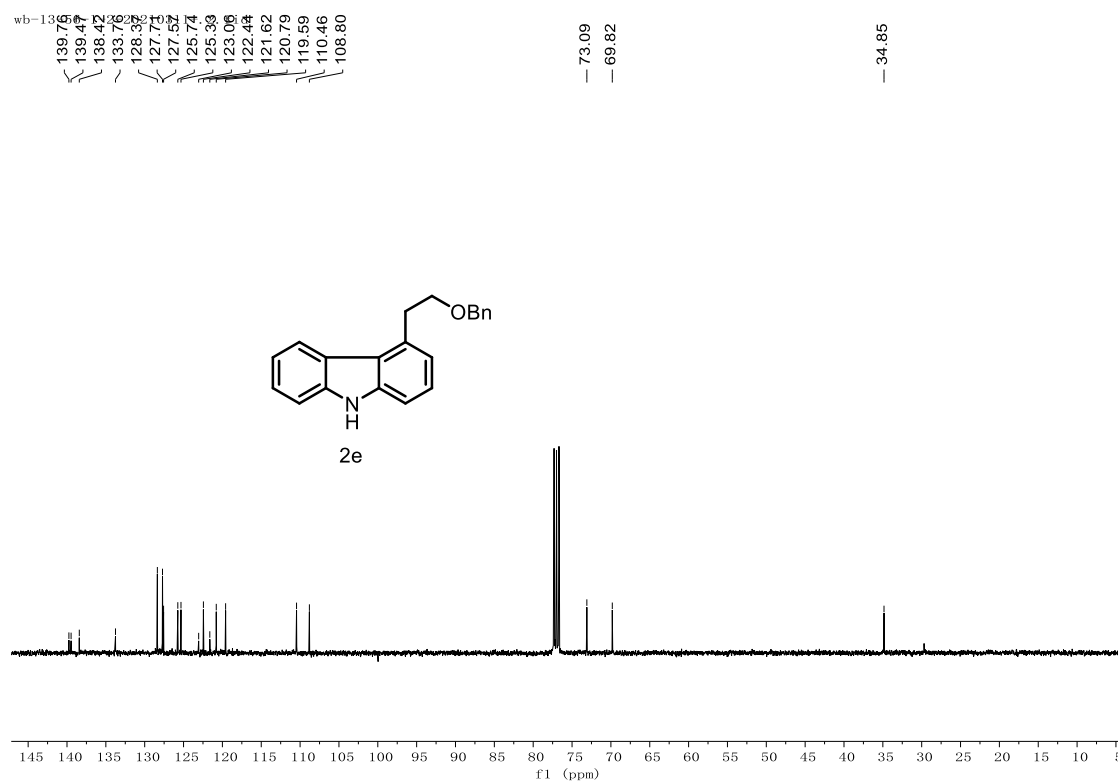

wb-13-56-2-1  
 9.29  
 8.16  
 8.16  
 8.08  
 8.08  
 8.02  
 8.02  
 8.00  
 8.00  
 7.45  
 7.44  
 7.43  
 7.42  
 7.41  
 7.41  
 7.40  
 7.40  
 7.39  
 7.39  
 7.38  
 7.37  
 7.37  
 7.36  
 7.36  
 7.35  
 7.35  
 7.34  
 7.33  
 7.28  
 7.25  
 7.25  
 7.24  
 7.24  
 7.22  
 7.22  
 7.22  
 7.21  
 7.21  
 7.20  
 7.19  
 7.18  
 7.17  
 7.17  
 4.57  
 3.98  
 3.97  
 3.96  
 3.28  
 3.27  
 3.25

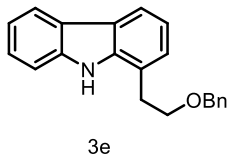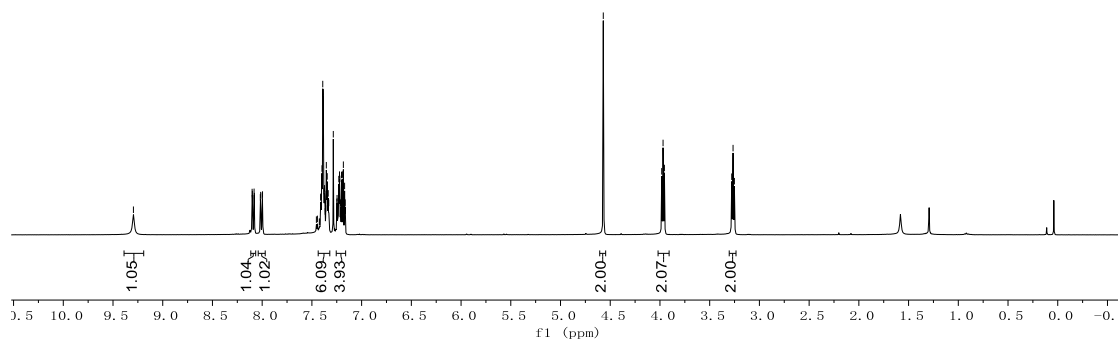

139.65  
 137.74  
 128.64  
 128.06  
 128.01  
 126.42  
 125.48  
 123.65  
 123.48  
 123.10  
 120.23  
 119.07  
 118.99  
 118.70  
 110.89  
 73.71  
 72.06  
 34.10

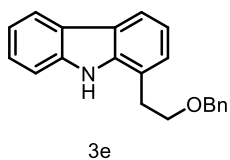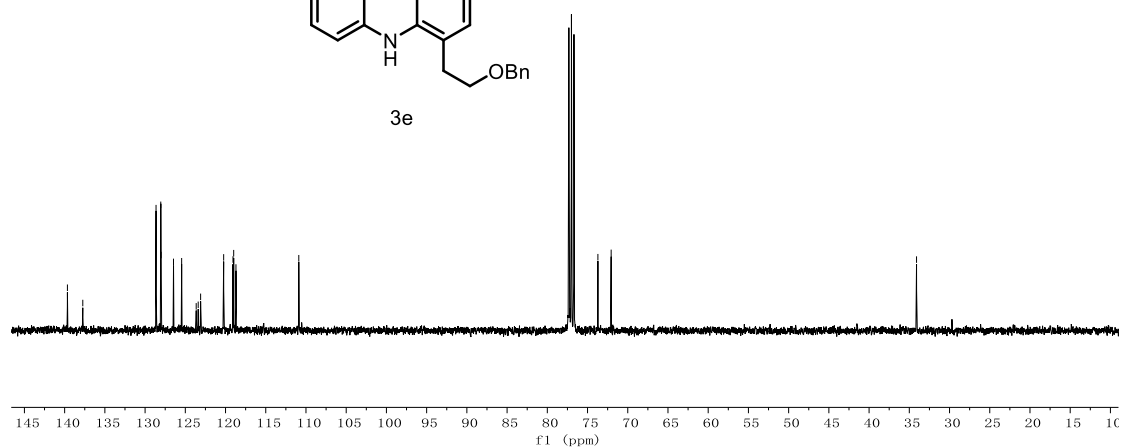

wb-2-98-a-20160709  
 PROTON CDC13

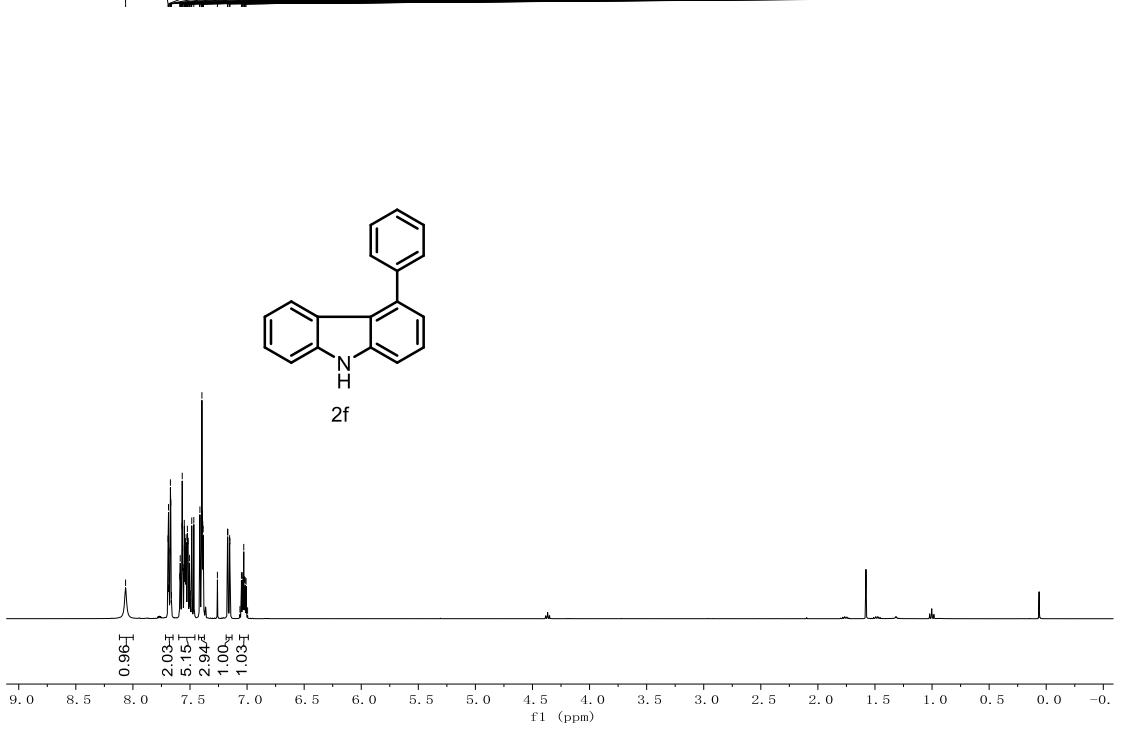

C 13  
 141.24  
 139.78  
 139.67  
 138.74  
 128.12  
 128.37  
 127.46  
 126.63  
 125.58  
 122.90  
 122.49  
 121.08  
 120.73  
 119.02  
 110.38  
 109.50

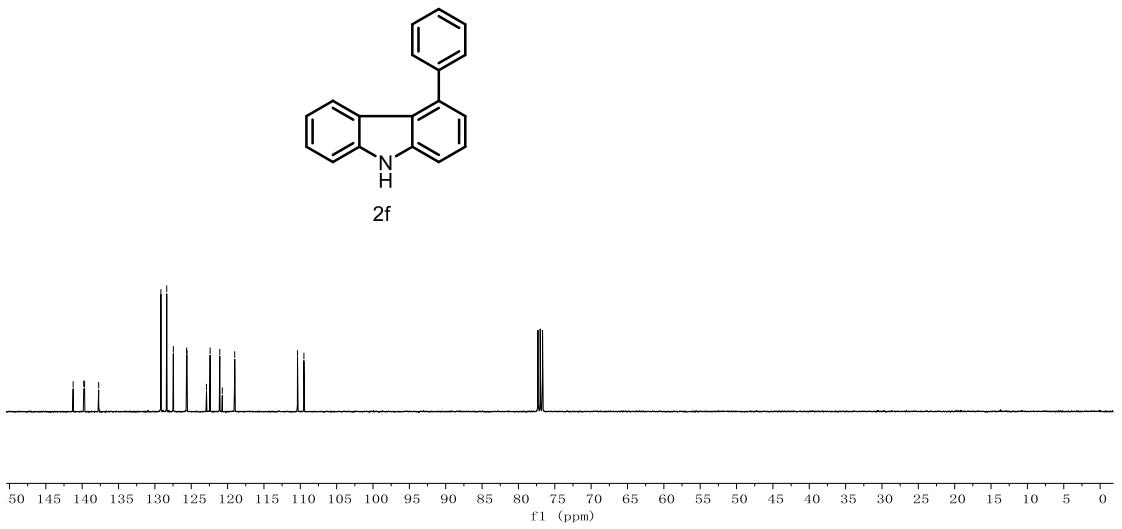

wb-11-99-1-20

8.16  
7.59  
7.58  
7.57  
7.56  
7.53  
7.52  
7.51  
7.50  
7.49  
7.48  
7.46  
7.45  
7.44  
7.44  
7.43  
7.42  
7.42  
7.40  
7.40  
7.38  
7.38  
7.38  
7.36  
7.36  
7.26  
7.09  
7.08  
7.07  
7.05  
7.04  
7.03  
7.03  
7.02  
7.01  
7.01

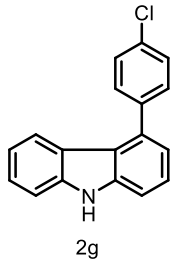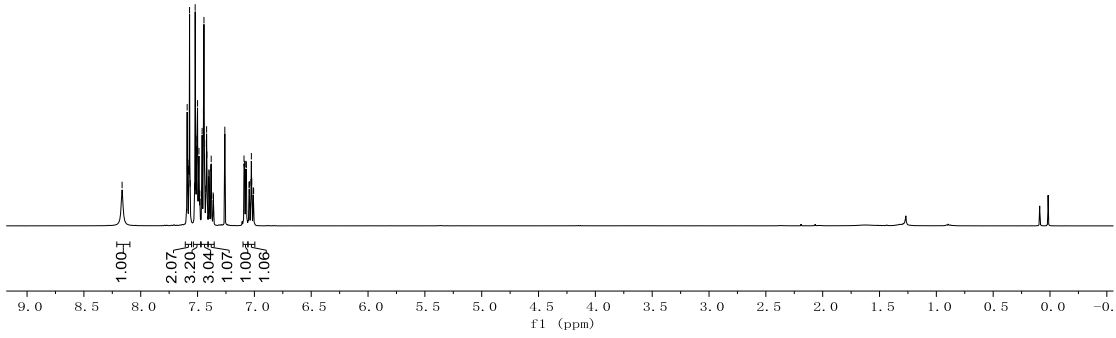

wb-11

139.77  
138.68  
138.68  
136.32  
133.43  
130.53  
128.59  
125.82  
125.62  
122.62  
122.23  
121.02  
120.55  
119.15  
110.50  
109.83

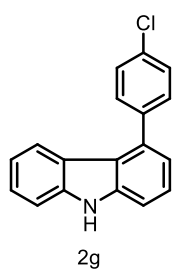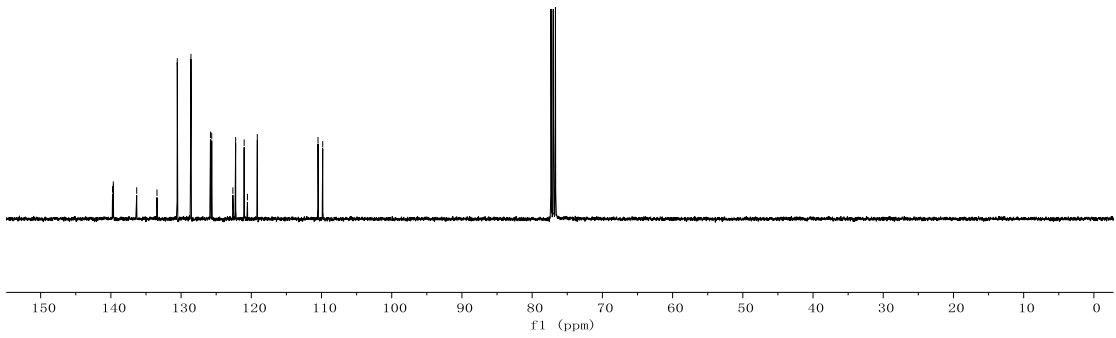

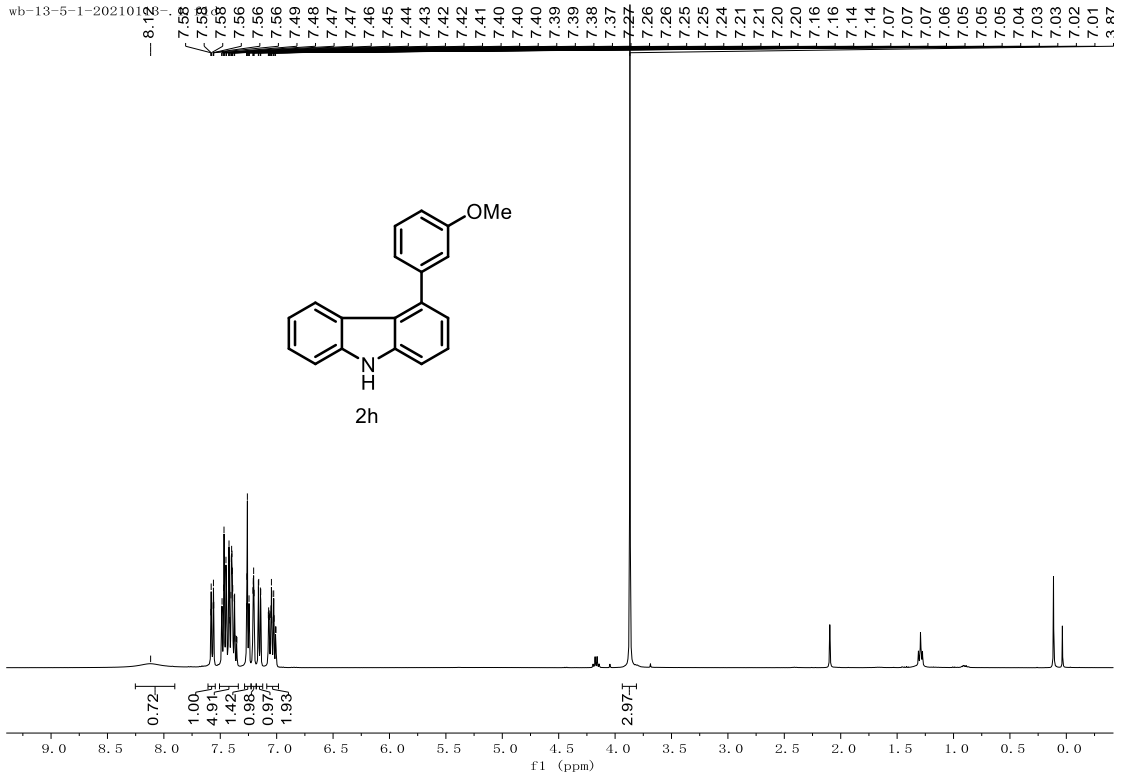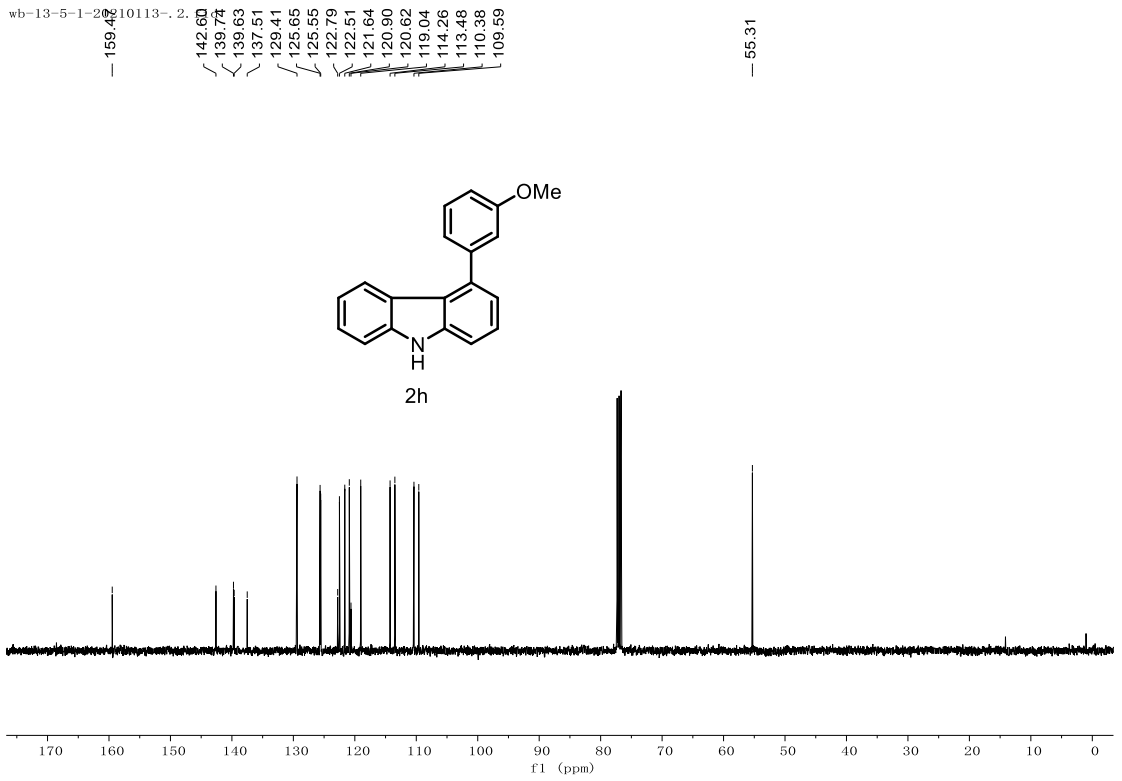

wb-13-22-1  
 PROTON CDCl<sub>3</sub>

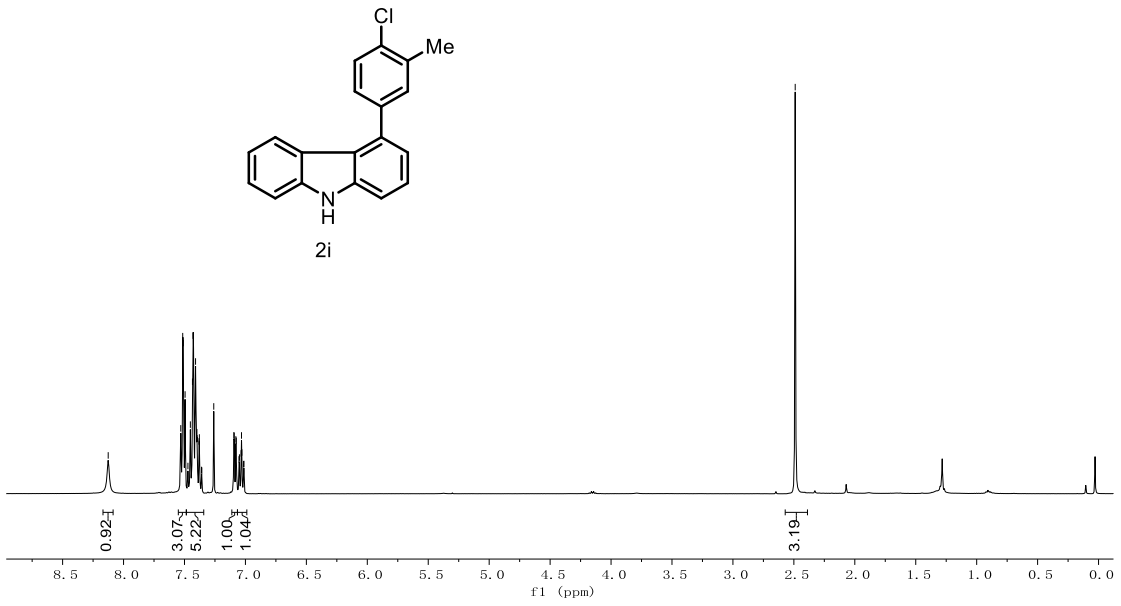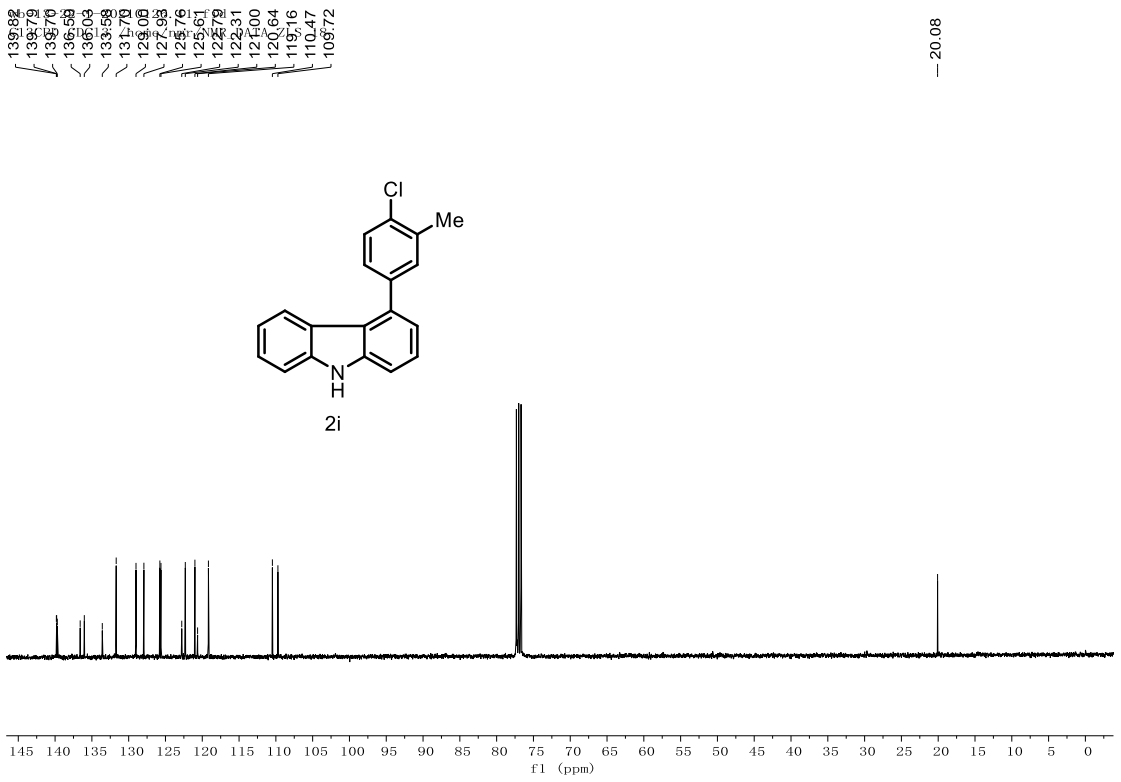

8.00  
7.72  
7.68  
7.64  
7.56  
7.54  
7.52  
7.50  
7.48  
7.47  
7.46  
7.45  
7.44  
7.43  
7.42  
7.38  
7.28  
7.26  
7.26  
7.12  
7.10  
7.03  
7.01  
7.00  
6.95

— 3.64

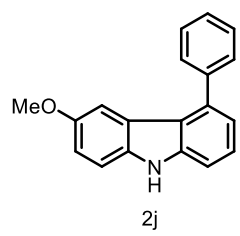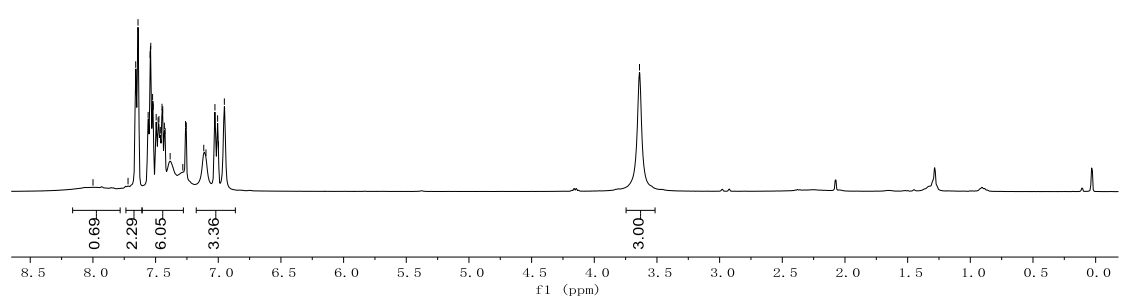

wb-13-7662-2021  
153.02  
141.09  
140.58  
137.61  
134.52  
129.27  
128.24  
127.50  
125.51  
123.26  
120.67  
120.50  
114.79  
110.98  
109.68  
105.24

— 55.52

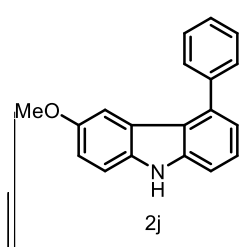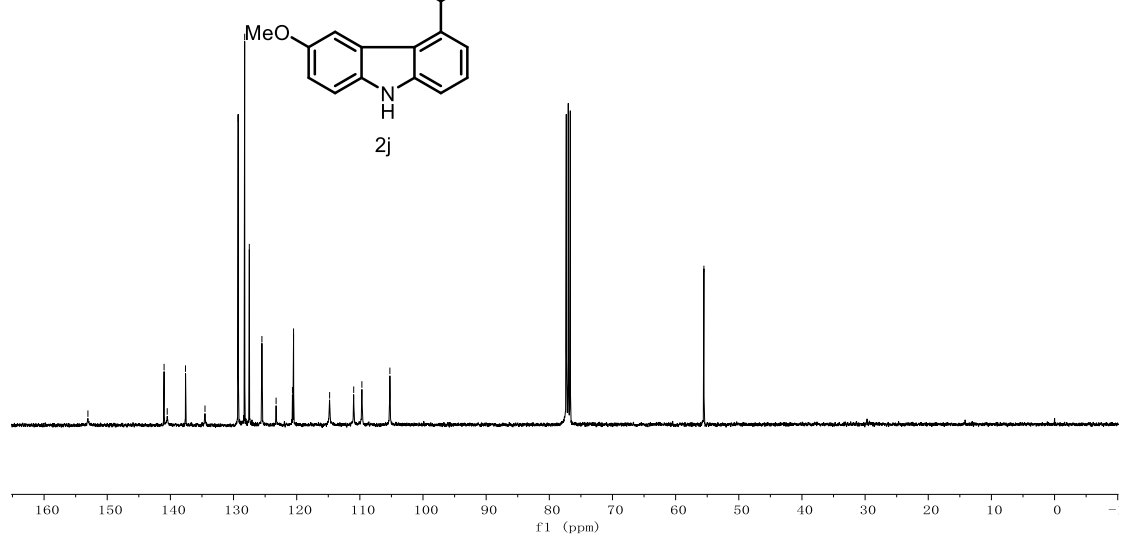

8.18  
8.13  
8.04  
8.02  
8.04  
8.09  
7.99  
7.95  
7.94  
7.99  
7.83  
7.83  
7.81  
7.81  
7.61  
7.60  
7.59  
7.58  
7.58  
7.57  
7.56  
7.54  
7.52  
7.52  
7.50  
7.46  
7.46  
7.44  
7.44  
7.43  
7.41  
7.39  
7.39  
7.37  
7.37  
7.26  
7.25  
7.25  
7.24  
7.23  
6.98  
6.98  
6.96  
6.96  
6.96  
6.94  
6.94

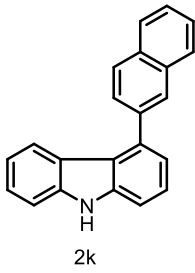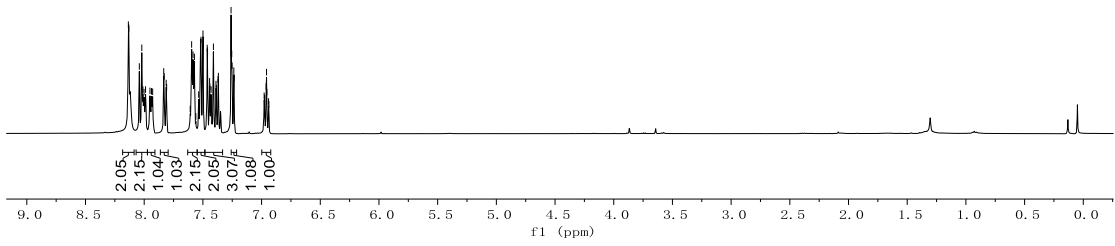

139.89  
139.73  
138.84  
137.56  
137.56  
132.61  
128.29  
127.88  
127.80  
127.72  
126.21  
125.99  
125.68  
122.93  
122.50  
121.42  
120.89  
119.11  
110.39  
109.63

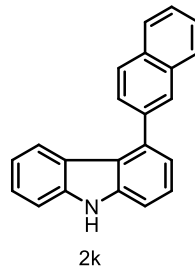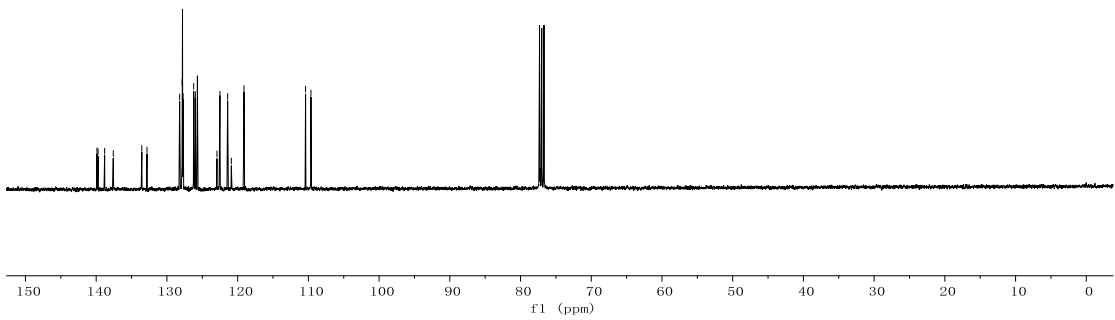



8.86  
8.86  
8.86  
8.85  
8.85  
8.57  
8.57  
7.88  
7.87  
7.86  
7.85  
7.84  
7.75  
7.74  
7.74  
7.73  
7.72  
7.72  
7.61  
7.61  
7.59  
7.59  
7.46  
7.44  
7.44  
7.42  
7.41  
7.41  
7.40  
7.40  
7.39  
7.39  
7.38  
7.38  
7.36  
7.36  
7.35  
7.35  
7.34  
7.34  
7.33  
7.32  
7.32  
7.31  
7.31  
7.30  
7.29  
7.29  
7.26  
7.26  
7.03  
7.02  
7.02  
7.01  
7.00  
7.00

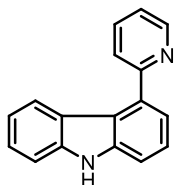

21

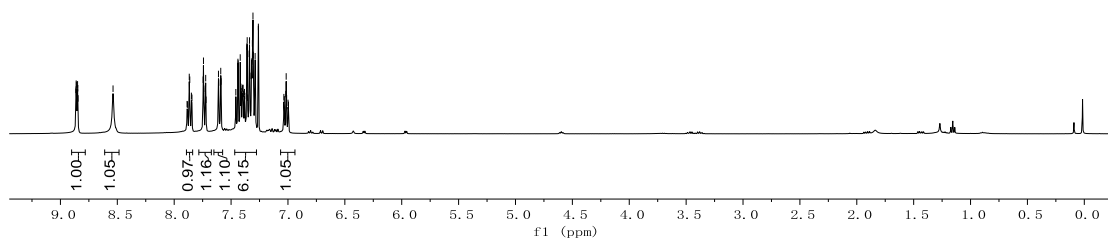

159.49  
149.44  
140.08  
139.90  
136.68  
136.02  
125.74  
124.23  
122.71  
122.40  
122.36  
121.00  
120.44  
118.90  
110.77  
110.49

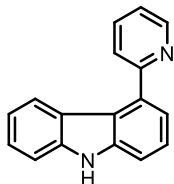

21

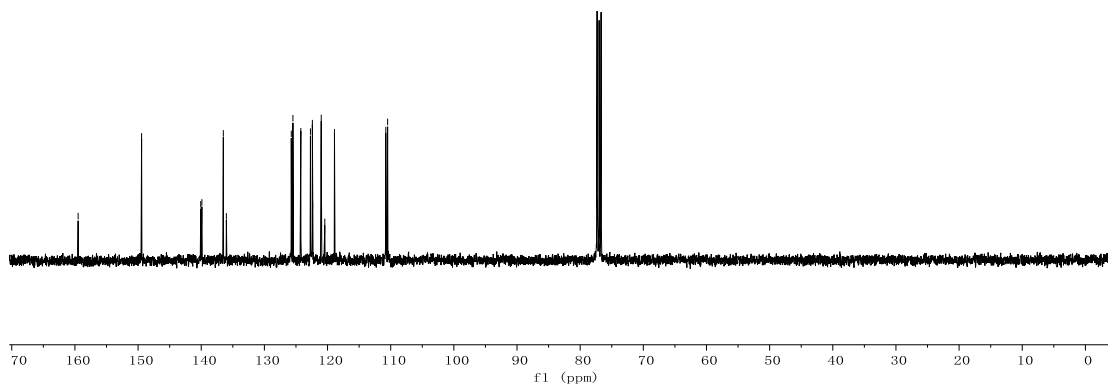

8.12  
7.97  
7.93  
7.72  
7.65  
7.64  
7.43  
7.42  
7.41  
7.40  
7.40  
7.38  
7.38  
7.26  
7.15  
7.14  
7.13  
7.12  
7.11  
7.11  
7.10  
7.09  
6.79  
6.79  
6.79  
6.78

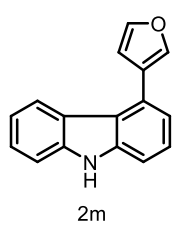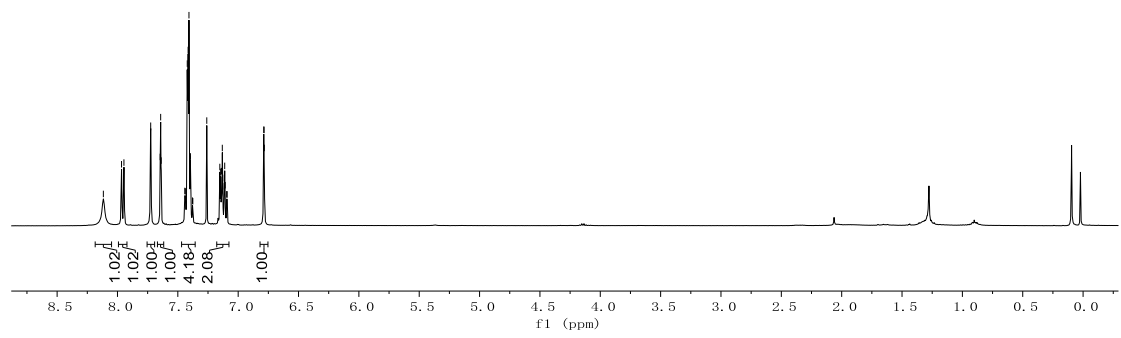

wb-1  
C13  
142.83  
139.99  
139.89  
139.64  
128.10  
125.73  
125.55  
125.45  
123.01  
122.47  
121.45  
121.33  
118.21  
112.16  
110.41  
108.78

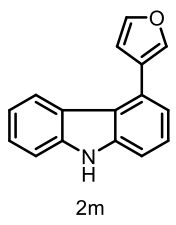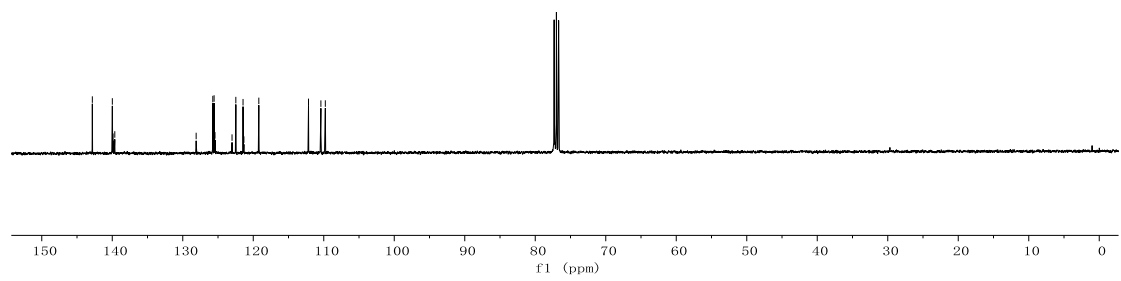

0612-YLN-20210612  
 PROTON CDC13 /home/nmr/NMR\_DATA\_ZLS 31

8.31  
 7.78  
 7.74  
 7.72  
 7.70  
 7.24  
 7.22  
 7.18  
 6.48  
 6.47

2.88  
 2.72  
 2.67

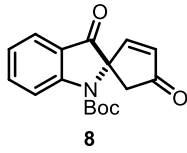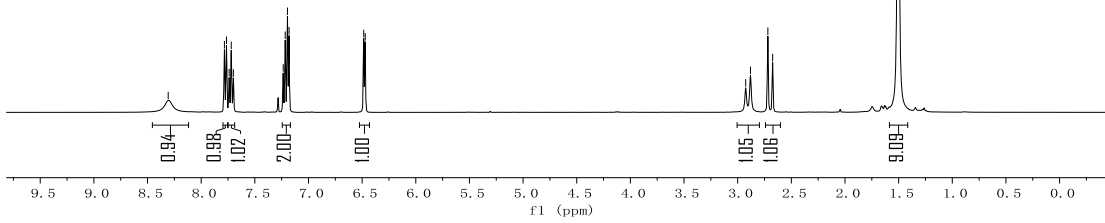

0612-YLN-20210612  
 C13CPD CDCl3 /home/nmr/NMR\_DATA\_ZLS 31

158.37  
 150.09  
 138.11  
 136.09  
 124.79  
 123.73  
 121.83  
 111.11  
 83.79  
 74.75  
 43.30  
 28.11

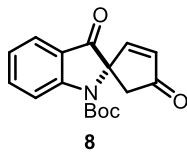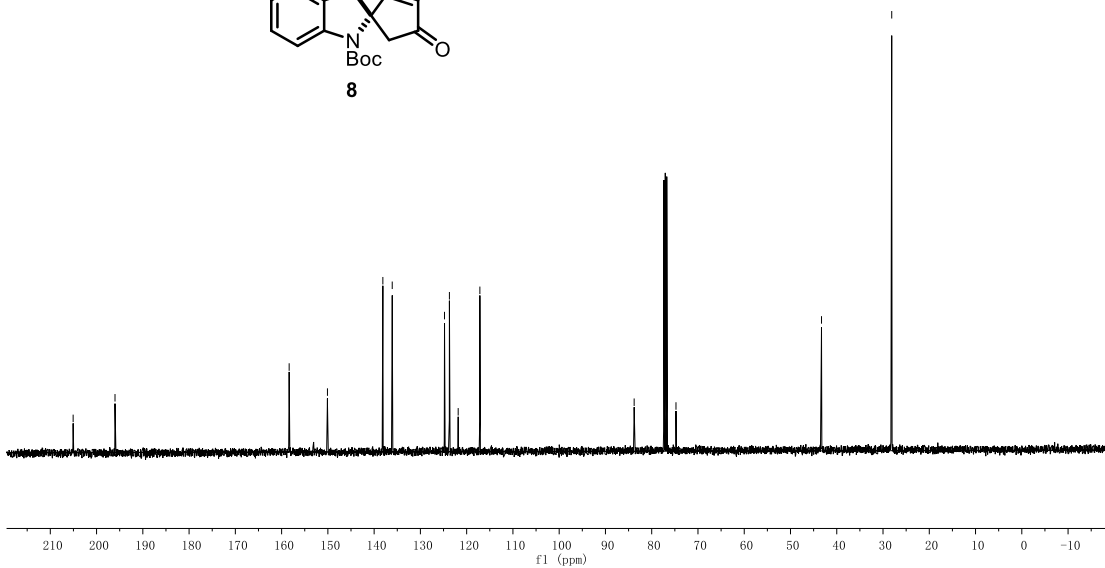

0611-ome-y1-20210611

PROTON CDC13 /home/nmr/NMR\_DATA

8.30  
7.36  
7.34  
7.32  
7.22  
7.20  
6.51  
6.49

3.87

2.95  
2.91  
2.75  
2.70

1.52

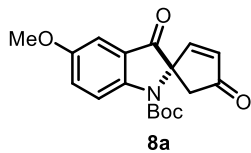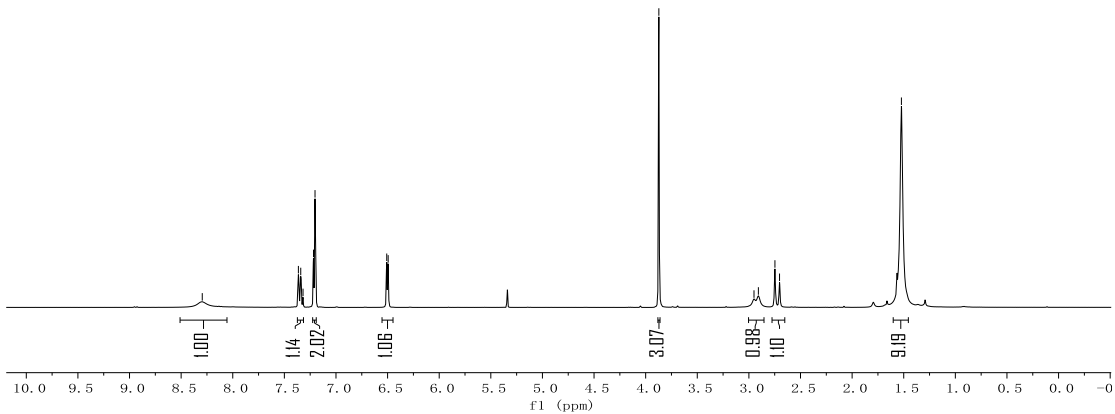

0611-ome-y1-20210611

C13 CPD CDC13 /home/nmr/NMR\_DATA

158.47  
158.29  
150.02  
135.97  
127.38  
122.46  
118.28  
105.05

83.48

75.11

55.84

43.27

28.14

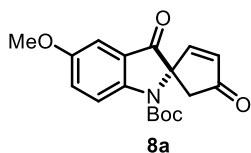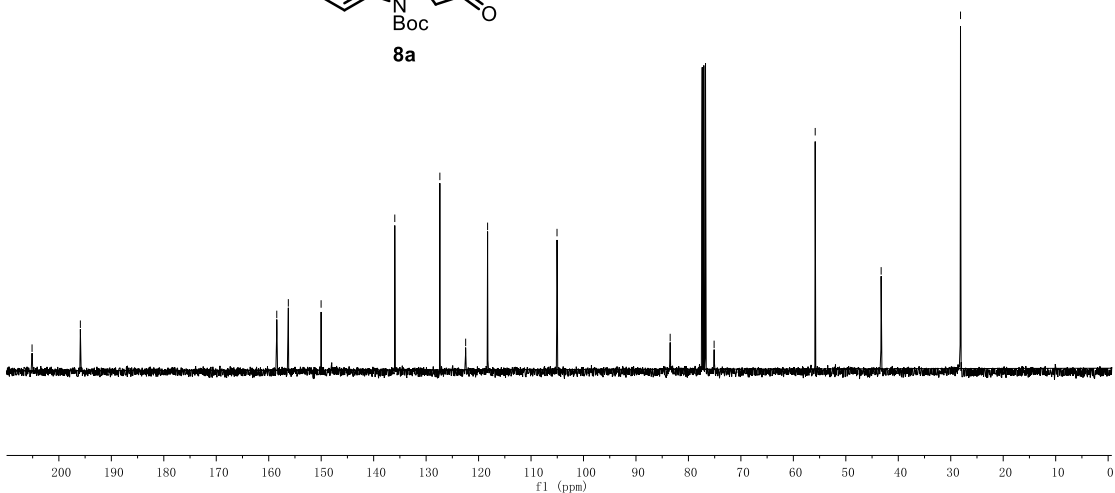

ph-oh-20210612

PROTON CDC13 /home/nmr/NMR\_DATA/ZLS 30

8.03  
8.02  
7.42  
7.40  
7.38  
7.32  
7.22  
7.20  
7.13  
7.11  
7.09  
6.78

5.79  
5.77

3.31  
3.27  
3.20

2.94  
2.89

1.46

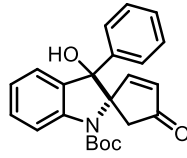

5a

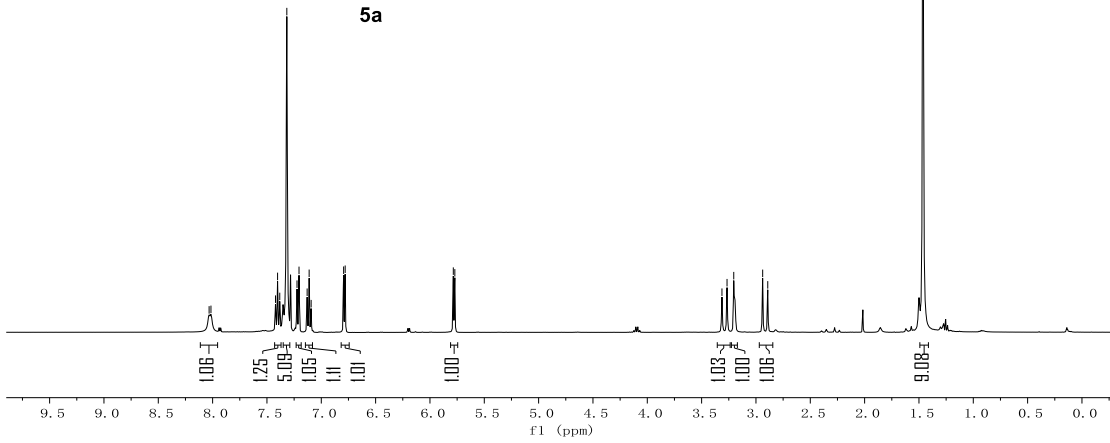

ph-oh-20210612

C13CDCl3 /home/nmr/NMR\_DATA/ZLS 30

160.67  
151.86  
142.65  
139.53  
133.15  
132.18  
128.26  
126.91  
123.71  
116.32

83.62  
82.85  
80.19

30.89

28.29

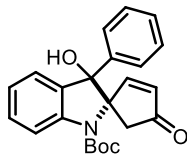

5a

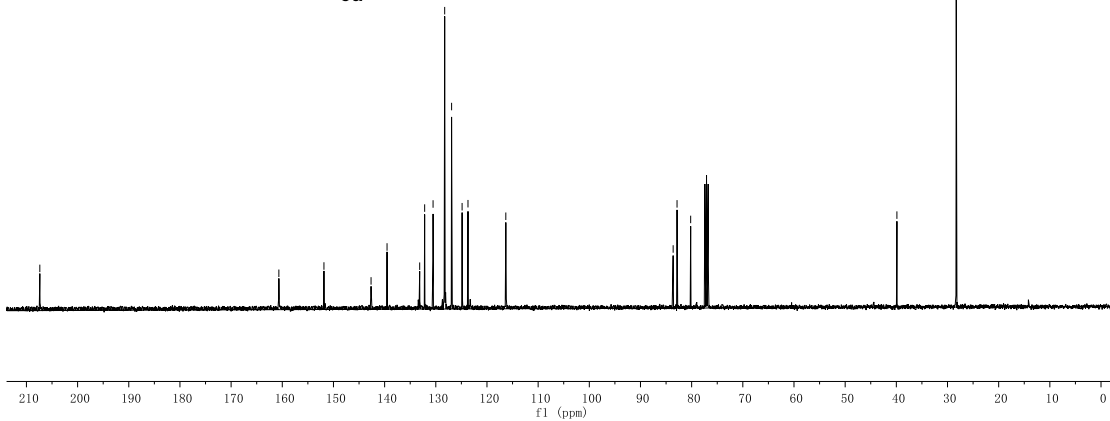

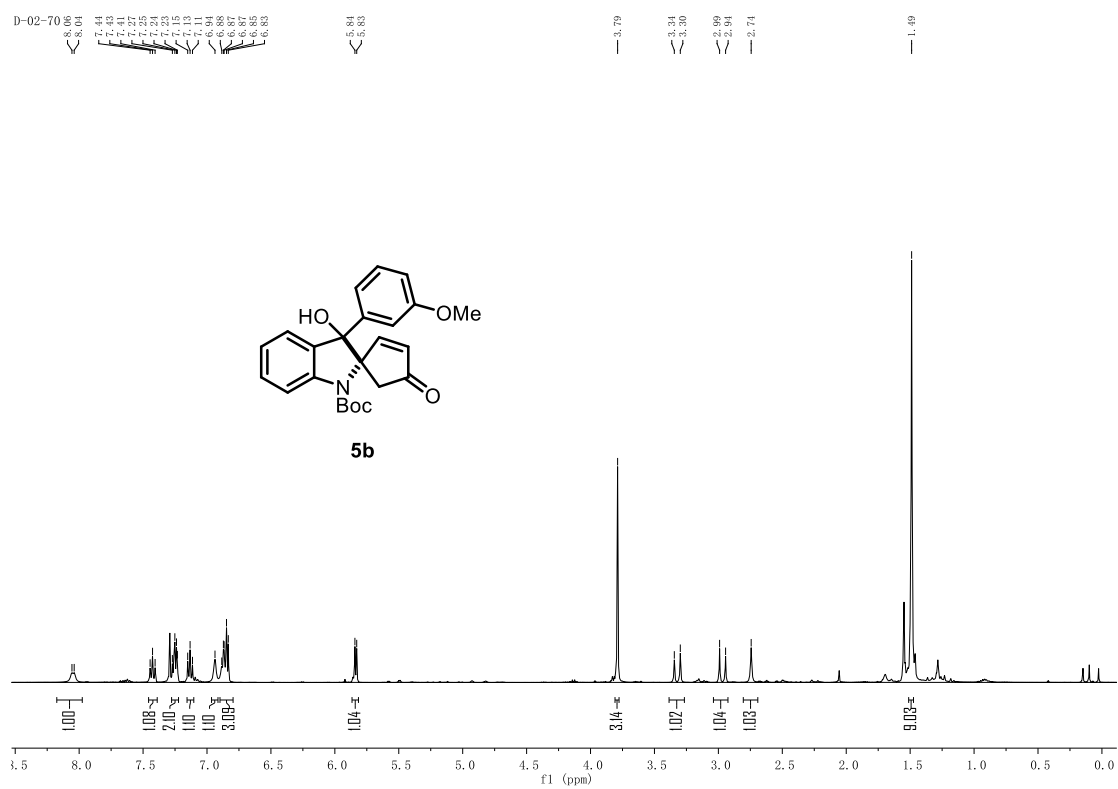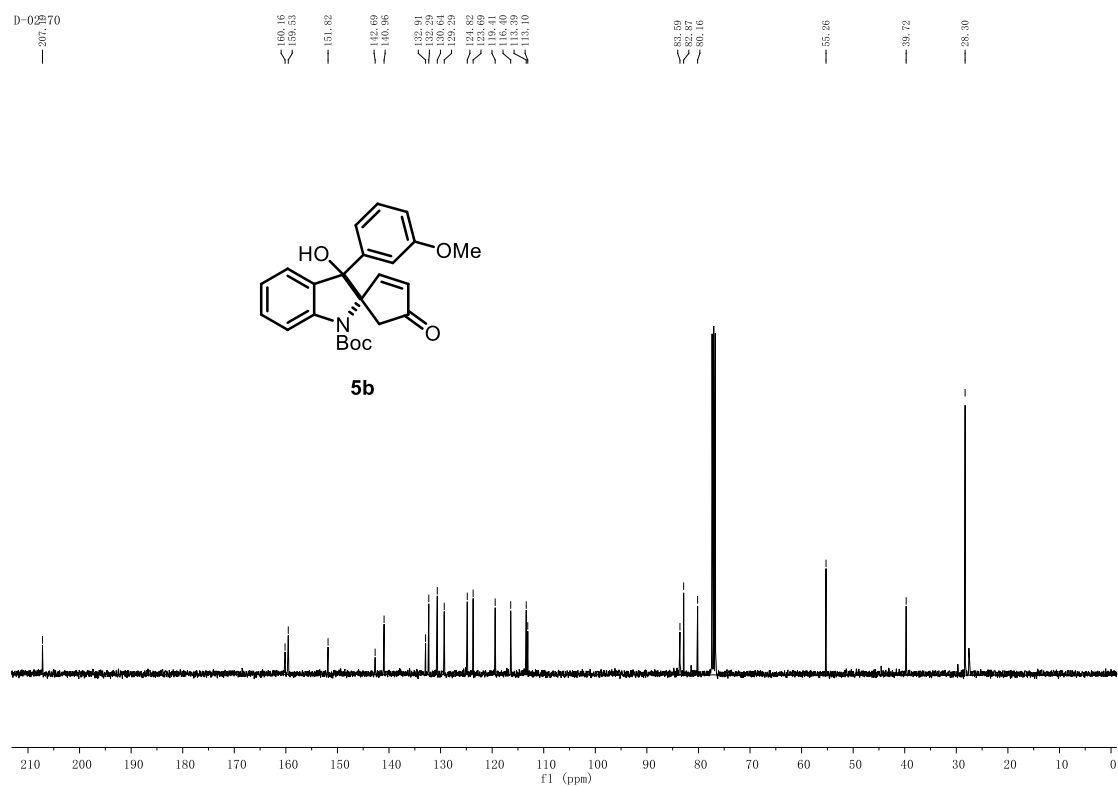

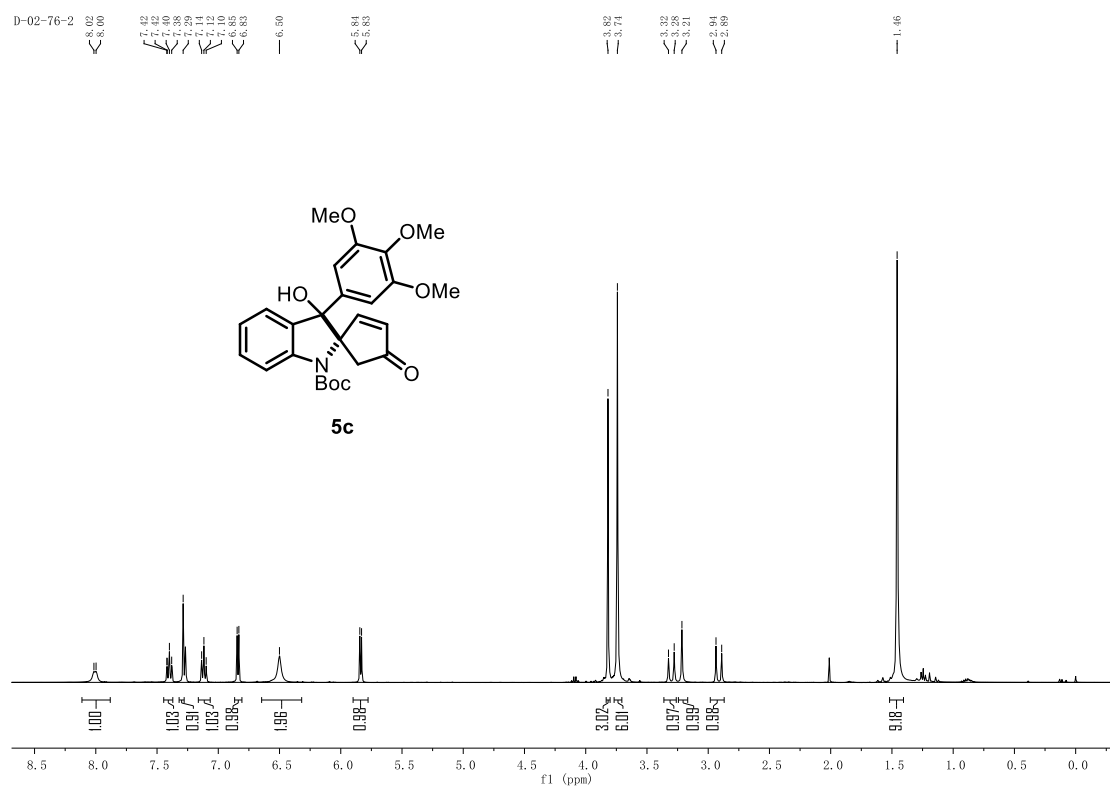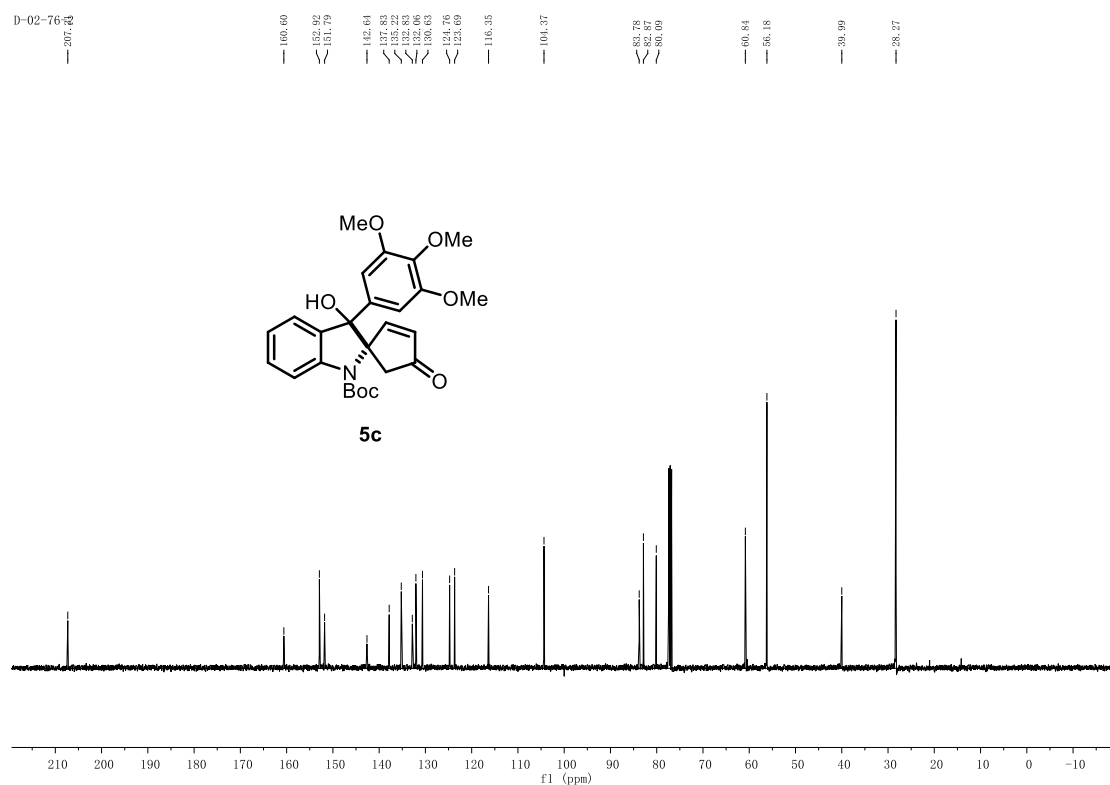

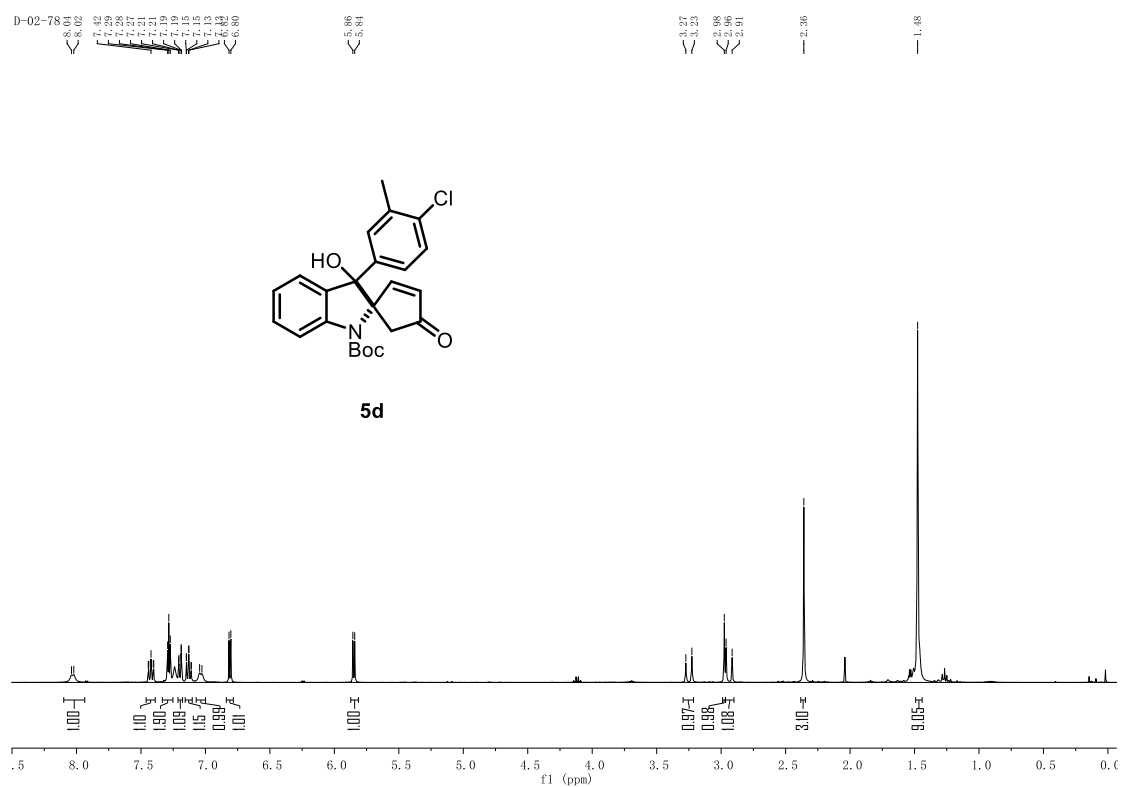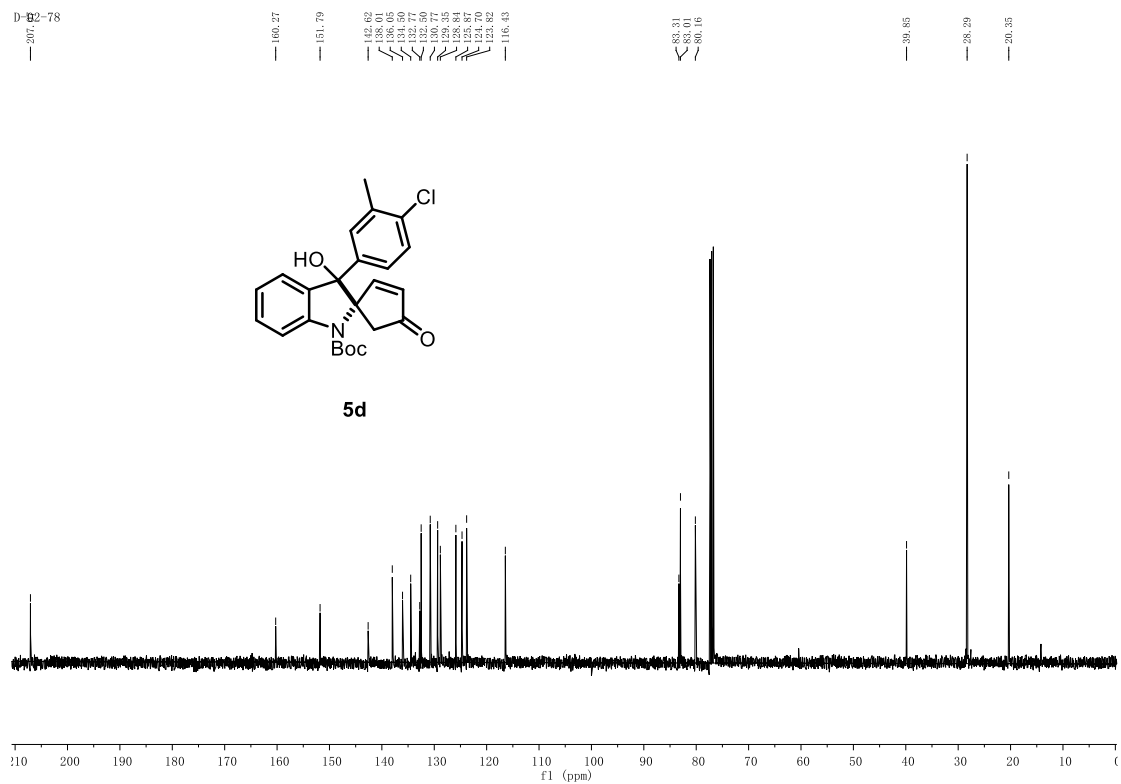



03-13-1-20210313

PROTON CDCl3 /home/nmr/NMR\_DATA/ZLS 16

8.01  
8.03  
7.41  
7.27  
7.26  
7.13  
7.10  
6.72  
6.71  
5.74  
5.73

3.34  
3.30  
2.99  
2.96  
2.48

1.47  
1.26

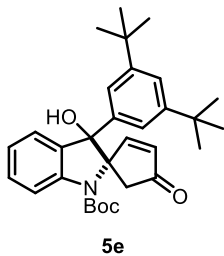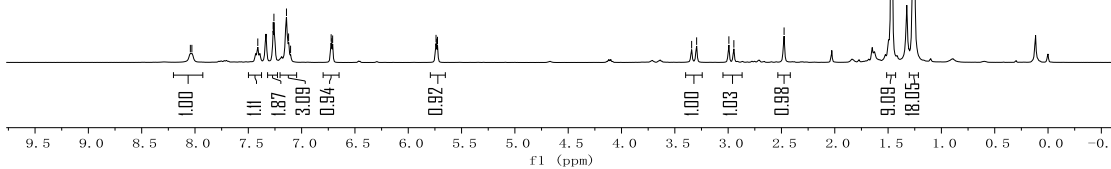

03-13-2-20210313

C13CD CDCl3 /home/nmr/NMR\_DATA/ZLS 15

196.97  
161.78  
140.21  
135.87  
134.81  
128.52  
127.96  
124.80  
123.48  
121.41  
120.72  
120.61  
113.92

85.44

73.96

50.05

33.53  
31.51  
28.04

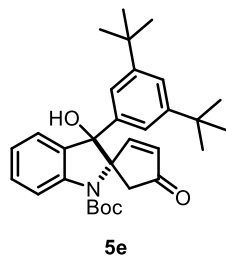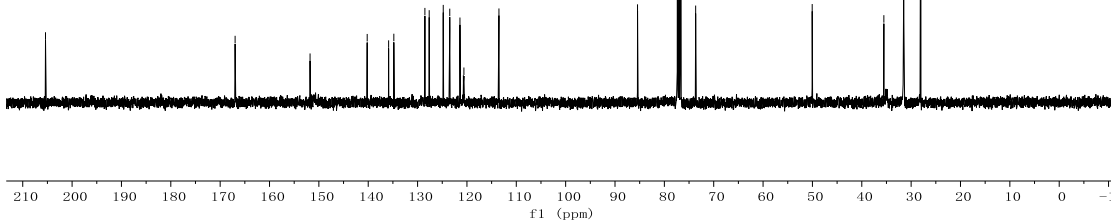

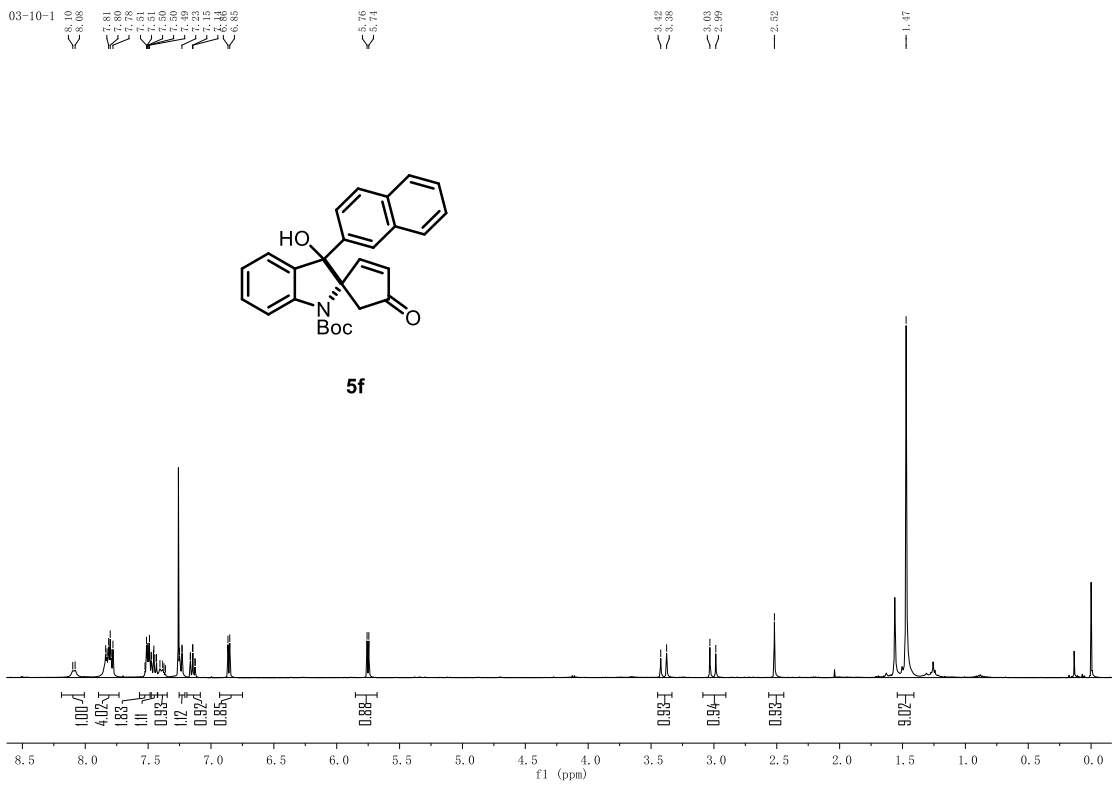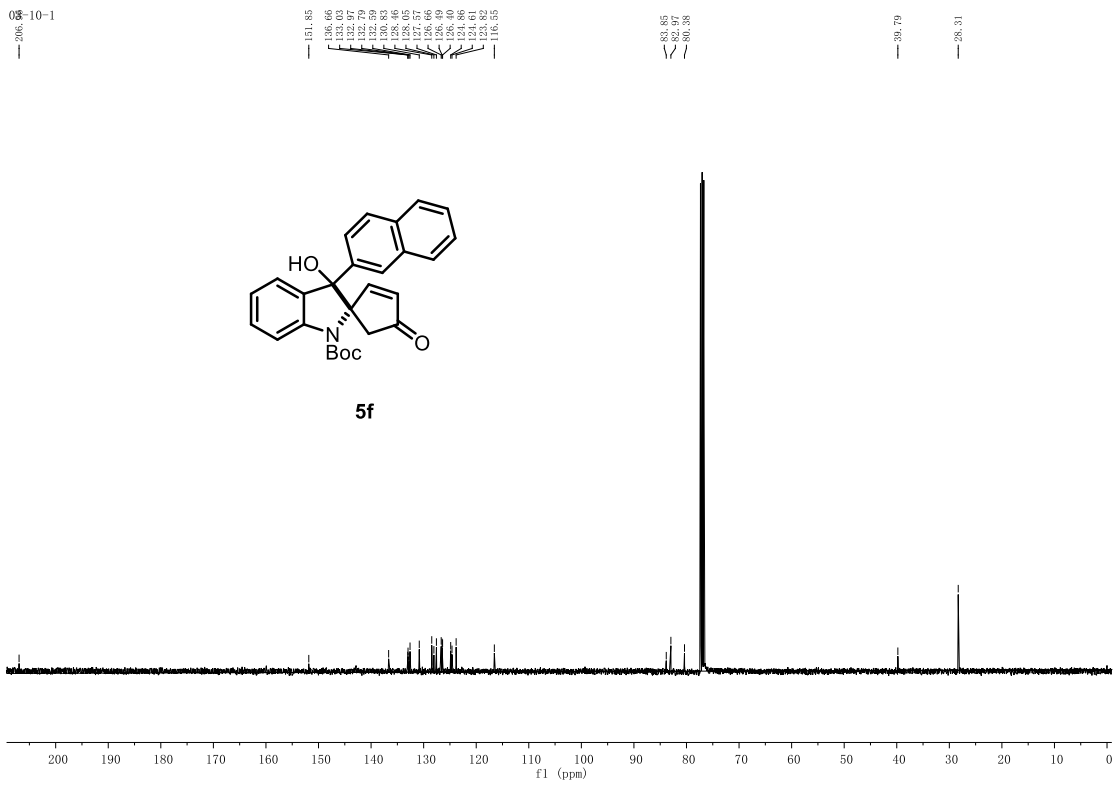

03-53-s-20210412  
 PROTON CDC13 /home/nmr/NMR\_DATA ZLS 7

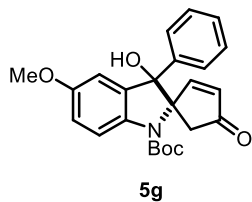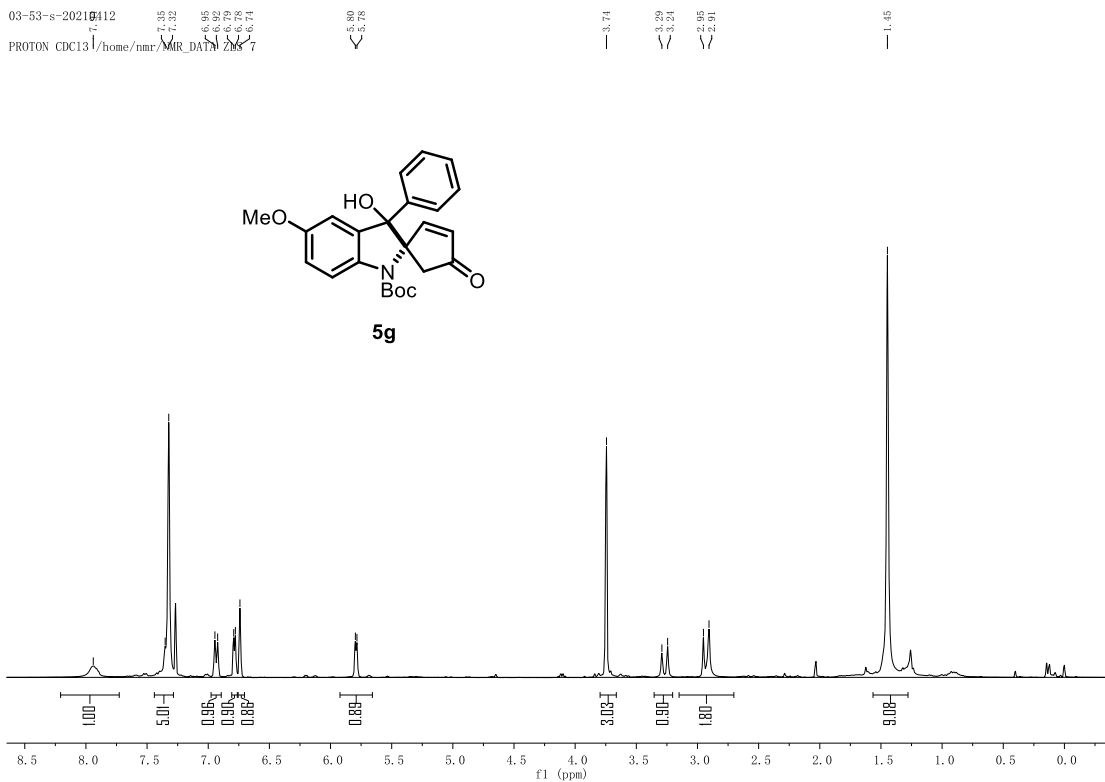

03-53-s-20210412  
 C13CPD CDC13 /home/nmr/NMR\_DATA ZLS 7

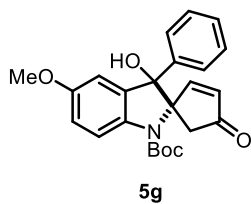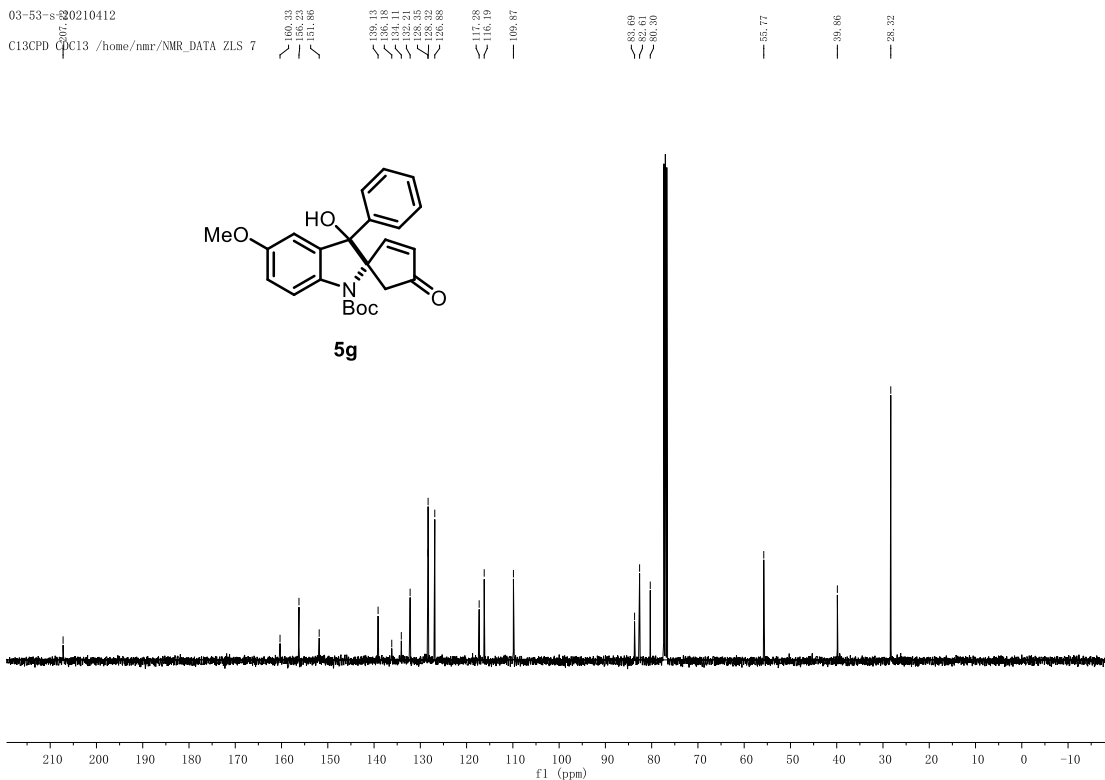

D-02-61-20210211  
 PROTON CDC13 /home/nmr/NMR\_DATA ZLS 26

6.27  
 6.26

3.13  
 3.08

2.64

2.59

2.01

1.99

1.95

1.94

1.90

1.70

1.68

1.64

1.62

1.51

0.84

0.82

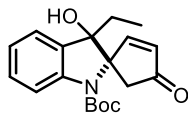

5h

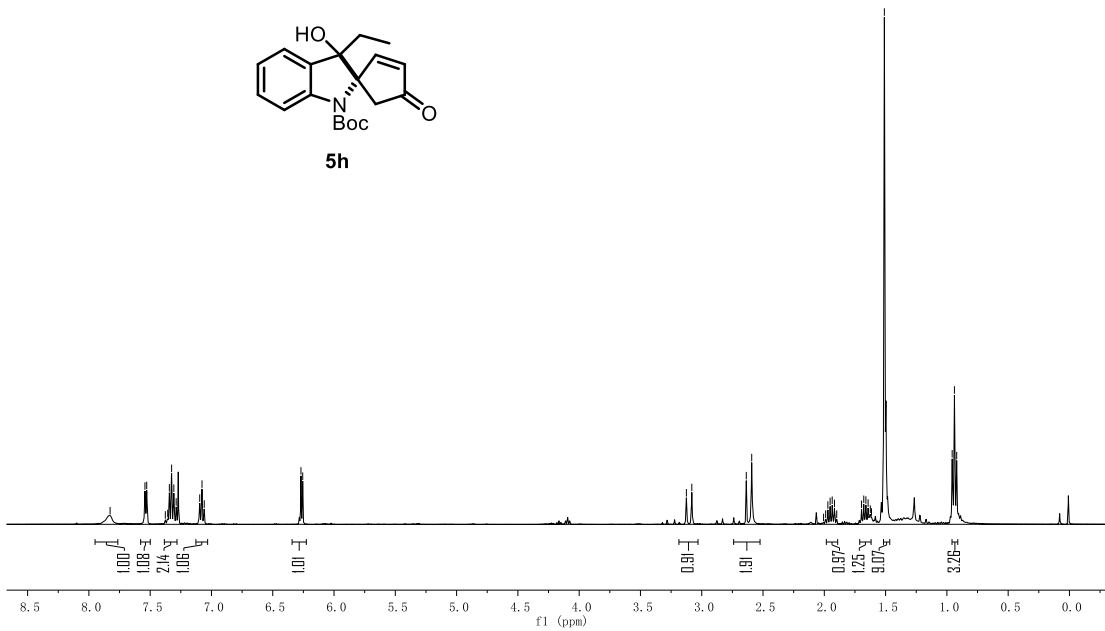

D-02-61-20210211

C13CPD CDCl3 /home/nmr/NMR\_DATA ZLS 26

161.49

151.94

133.82

133.23

129.72

123.82

122.98

115.69

82.87

82.37

79.52

42.21

38.64

38.92

7.61

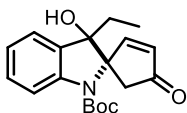

5h

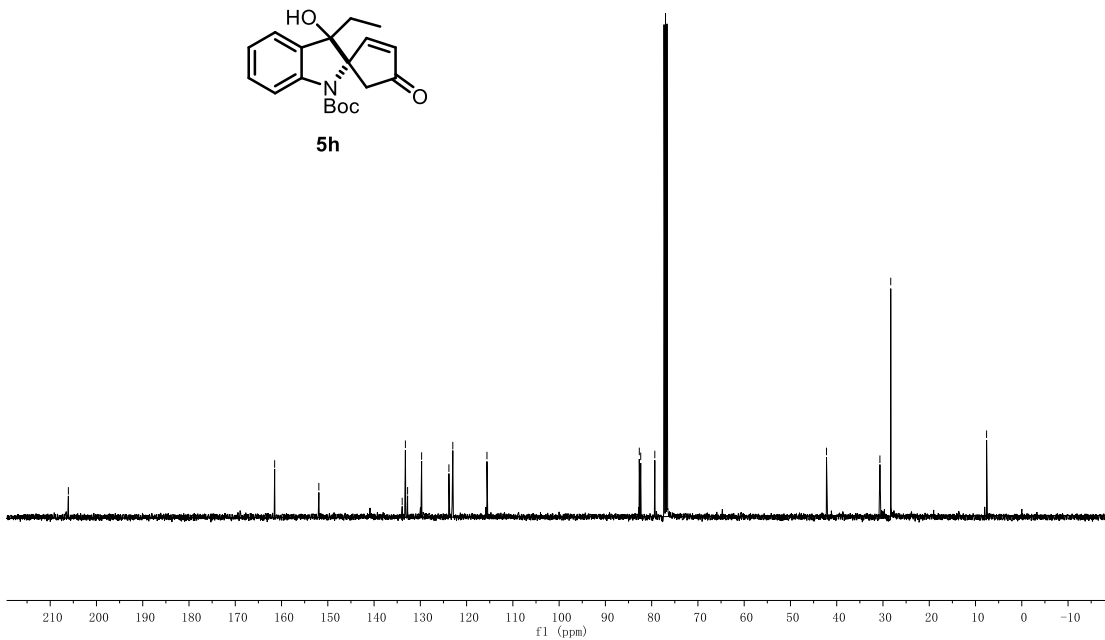

DKK-02-58-20210209  
 PROTON CDCl3 /home/nmr/NMR\_DATA\_ZLS\_28

6.24  
 6.22

3.40

3.08  
 3.04

2.55  
 2.51

1.85  
 1.85  
 1.83  
 1.66  
 1.34  
 1.32  
 1.29  
 1.25  
 1.24  
 0.86  
 0.83

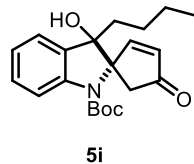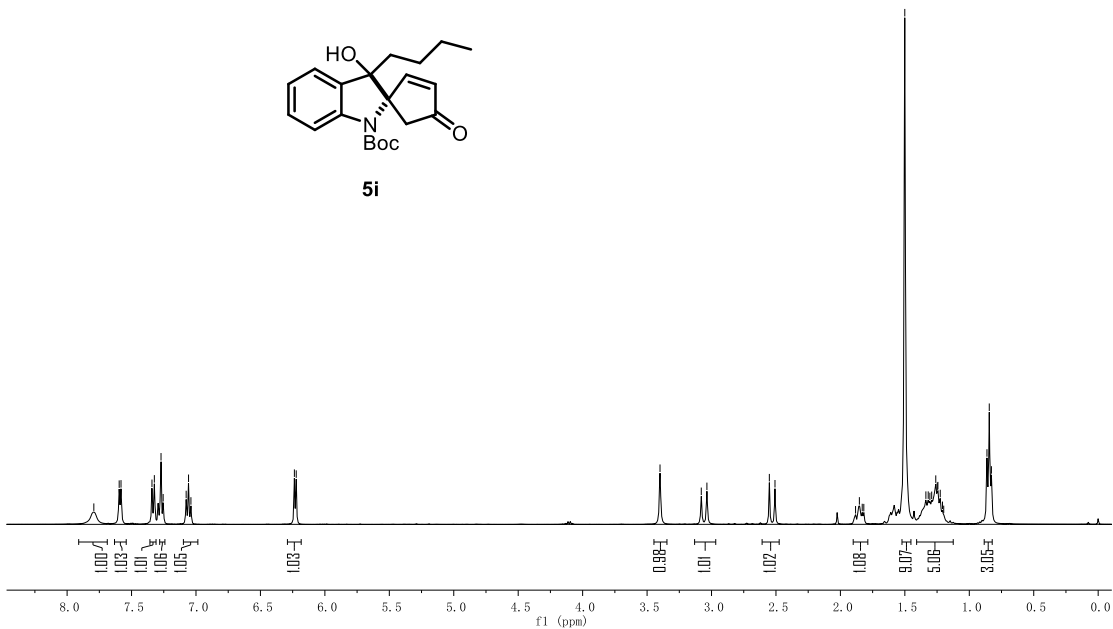

DKK-02-58-20210209

C13CPD /home/nmr/NMR\_DATA\_ZLS\_28

162.39  
 162.00

140.71  
 133.21  
 132.92  
 129.49  
 124.00  
 122.94  
 115.44

82.60  
 82.53  
 79.43

42.46

37.98

28.33  
 25.15  
 23.05

13.94

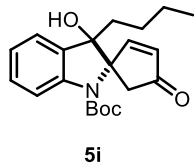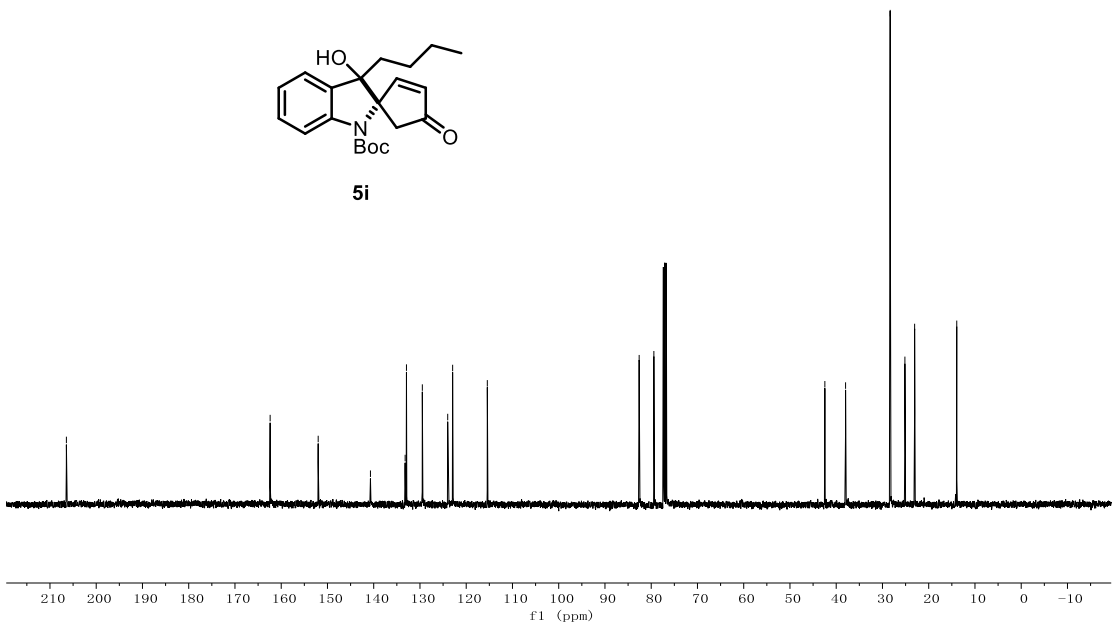

D-02-83-R

8.05  
7.64  
7.62  
7.51  
7.32  
7.28  
7.20  
6.97  
6.88  
6.86

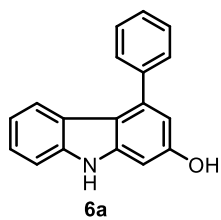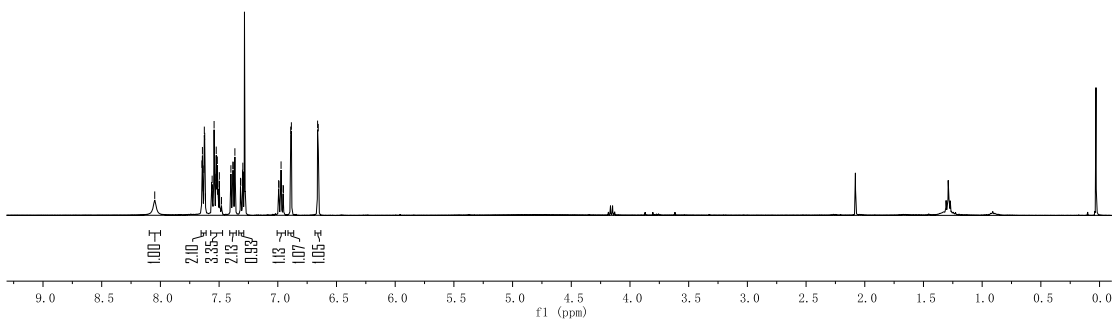

D-02-83-R

151.29  
141.29  
139.82  
138.79  
129.03  
128.43  
127.71  
127.29  
123.32  
121.44  
119.21  
115.20  
110.22  
110.16  
95.00

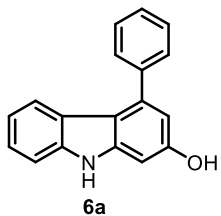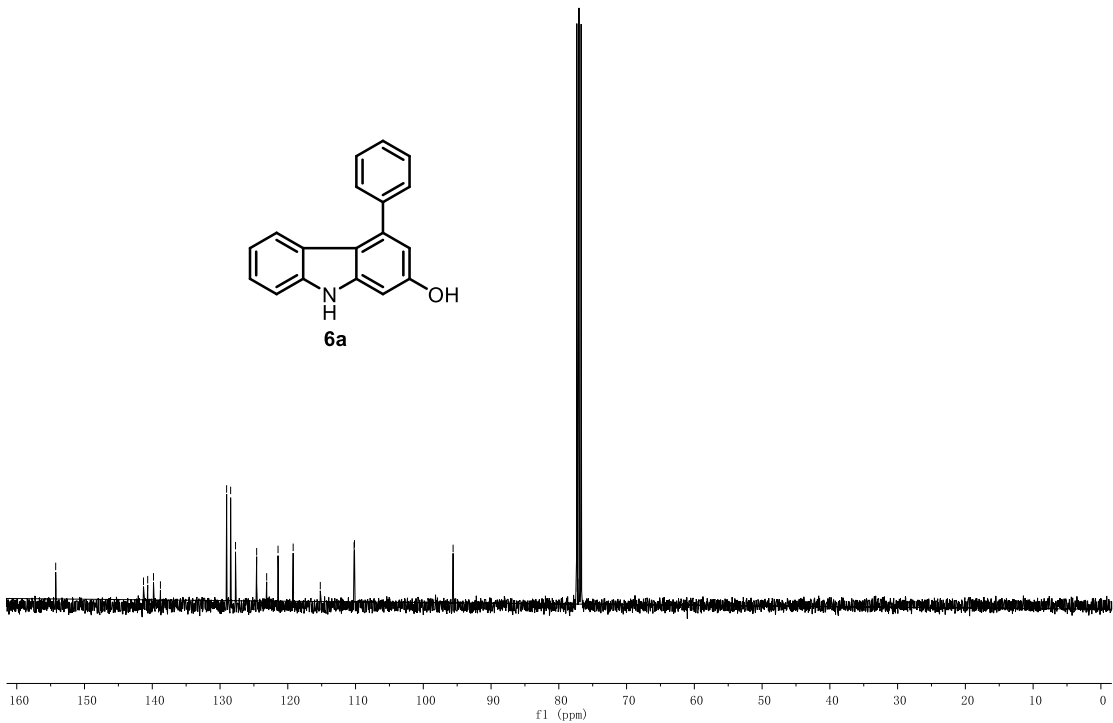

D-02-70R  
 8.05  
 7.73  
 7.42  
 7.35  
 7.28  
 7.21  
 7.16  
 7.15  
 6.97  
 6.88  
 6.85  
 6.65

4.97

3.86

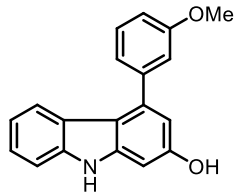

**6b**

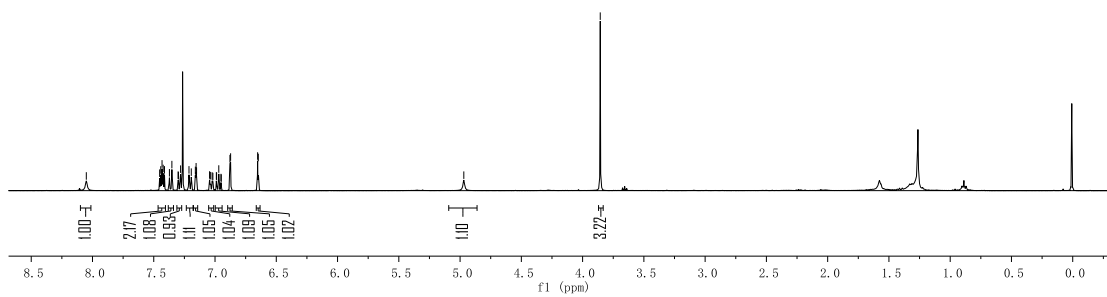

D-02-70R  
 159.58  
 154.25  
 142.04  
 139.81  
 138.60  
 129.47  
 124.09  
 123.06  
 121.57  
 121.49  
 115.12  
 114.15  
 113.75  
 110.15  
 110.09  
 55.67  
 55.37

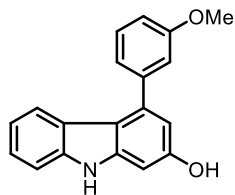

**6b**

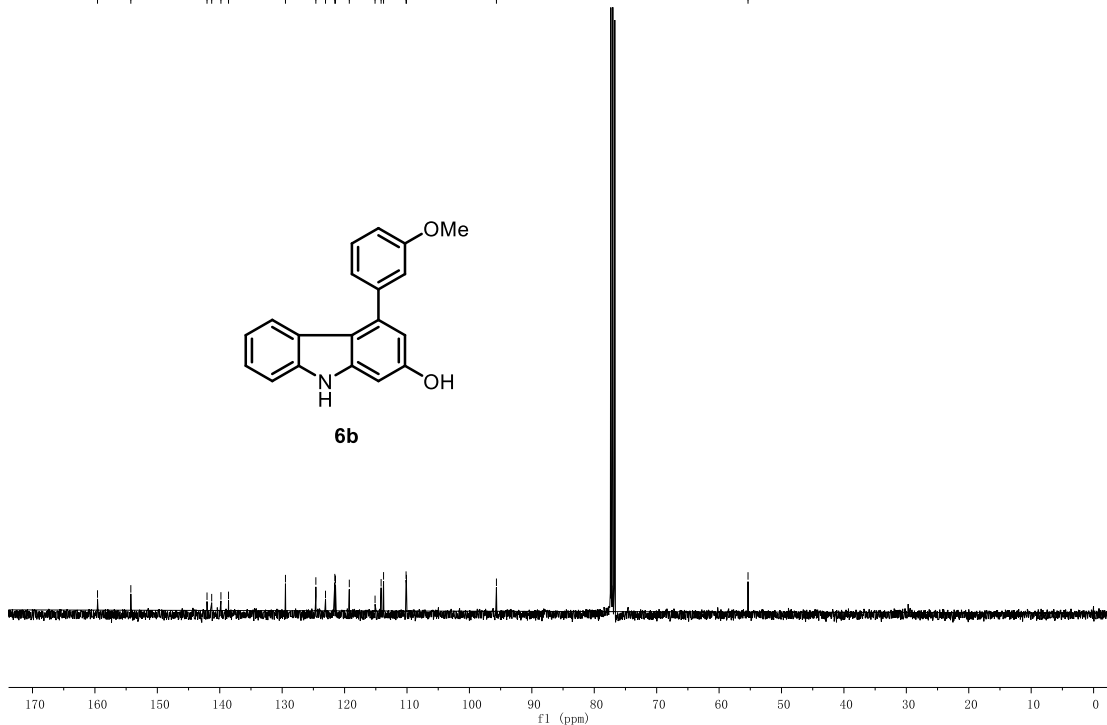

3ome-3-20210612

PROTON CDC13 /home/nmr/NMR\_DATA/2LS/30

8.16  
7.55  
7.53  
7.52  
7.31  
7.30  
7.03  
7.01  
6.89  
6.85  
6.68

4.01  
3.86

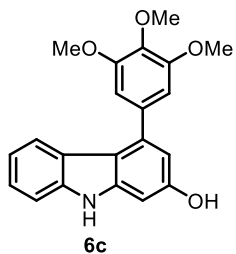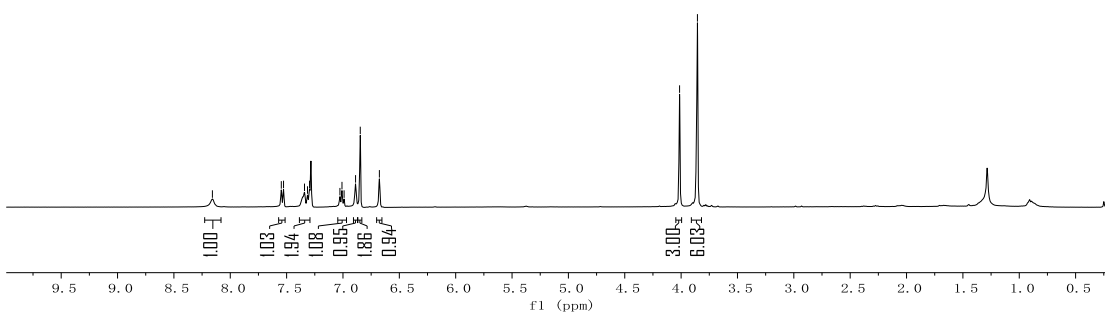

3ome-3-20210612

C13CPD CDC13 /home/nmr/NMR\_DATA/2LS/30

164.94  
163.11  
141.40  
139.84  
137.38  
137.38  
136.44  
124.60  
122.96  
121.50  
119.18  
110.29  
110.06  
106.10  
95.78

61.14  
56.18

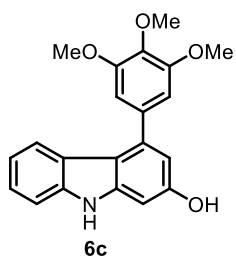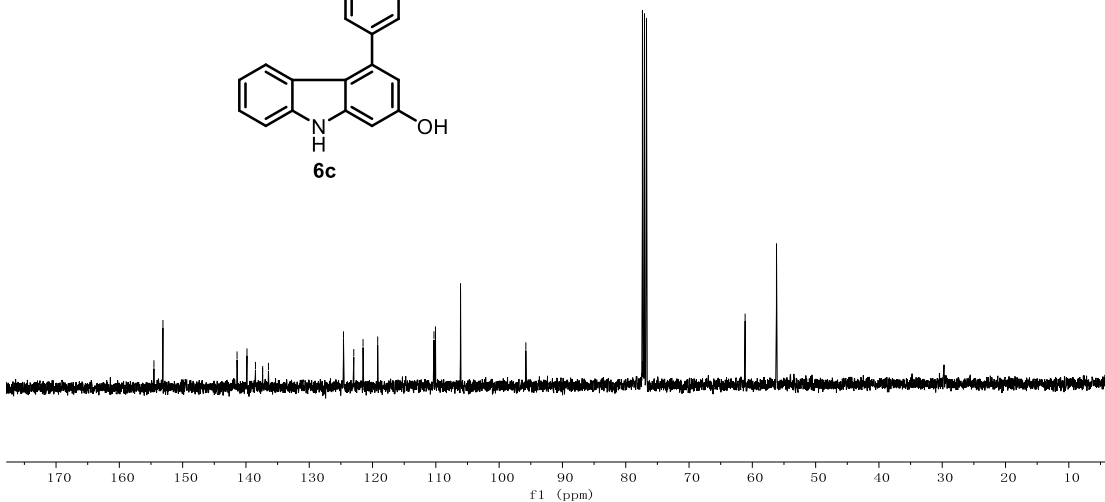



D-02-85-R  
 7.755  
 7.746  
 7.738  
 7.735  
 7.729  
 7.284  
 6.899  
 6.888  
 6.899  
 6.899

2.46

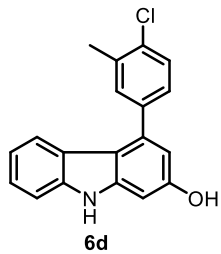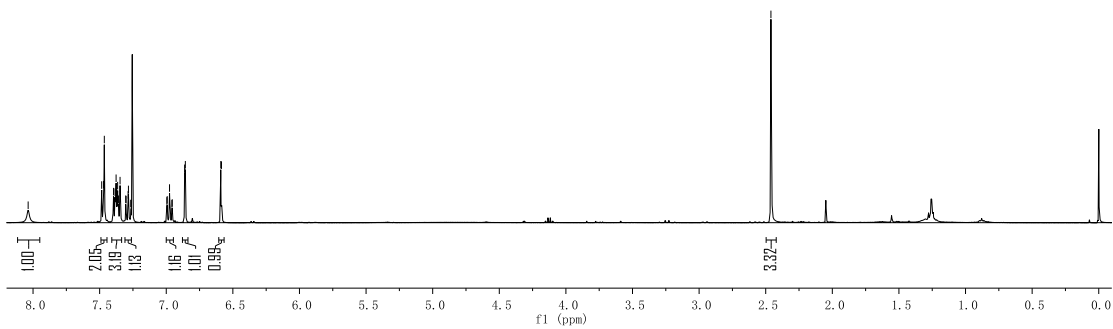

D-02-85-R

151.27

141.31  
 139.82  
 138.90  
 138.13  
 137.85  
 129.07  
 127.77  
 122.95  
 121.82  
 119.32

115.05

110.25  
 110.12

95.80

20.12

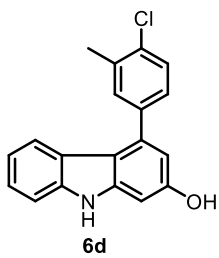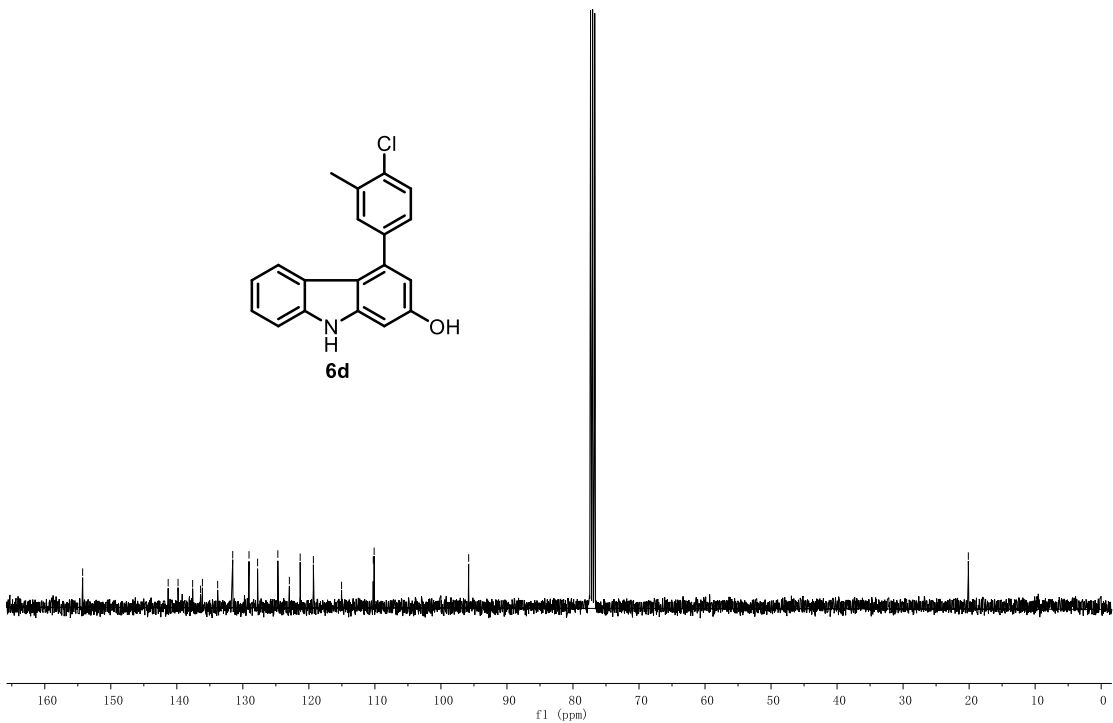





03-54R

7.91  
7.60  
7.58  
7.52  
7.49  
7.47  
7.45  
7.43  
7.23  
7.14  
6.91  
6.89  
6.83  
6.61

3.61

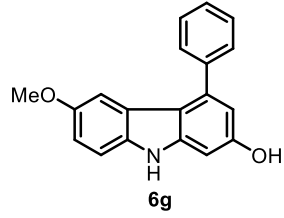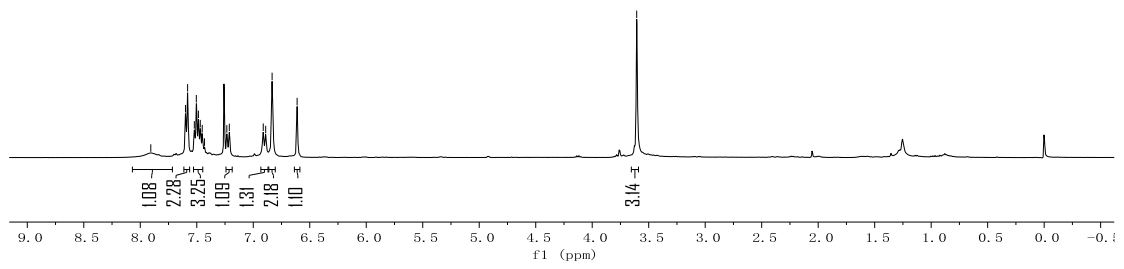

03-54R

154.20  
133.26

142.07  
140.46  
138.69

134.62

129.11  
128.22  
127.76

123.57

115.22  
114.26

110.66  
109.84

104.84

99.99

93.66

53.62

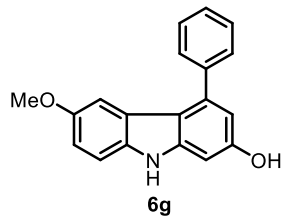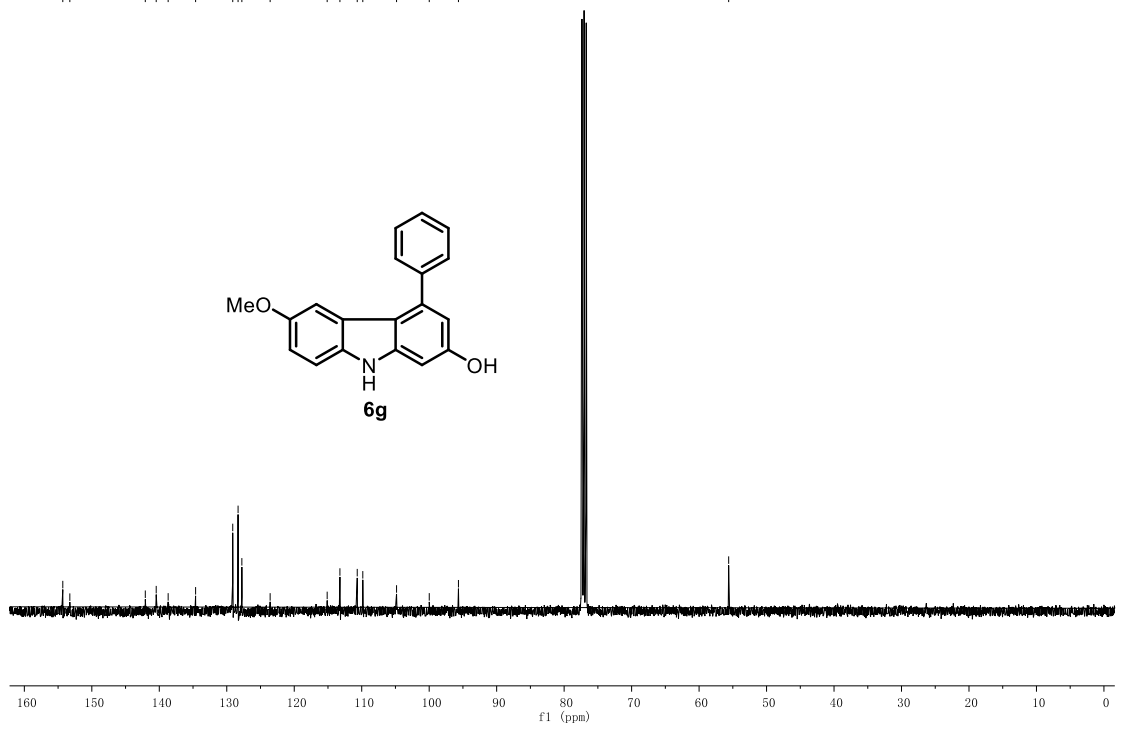

0610-YJR-20210609

PROTON CDC13 /home/nmr/

7.96  
7.94  
7.92  
7.32  
7.30  
7.28  
7.26  
7.25  
7.16  
7.15  
7.13  
6.65  
6.51

3.15  
3.13  
3.11  
3.09

1.38  
1.36  
1.34

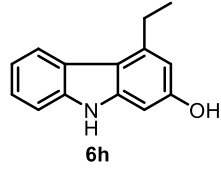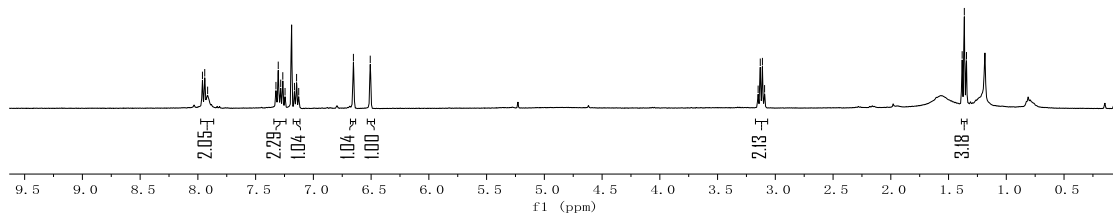

0610-YJR-20210609

C13CPD CDC13 /home/nmr/

133.00  
132.02  
129.02  
118.52  
114.34  
109.11  
107.14  
93.15

26.12

12.80

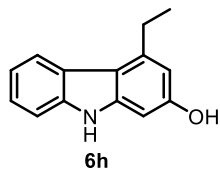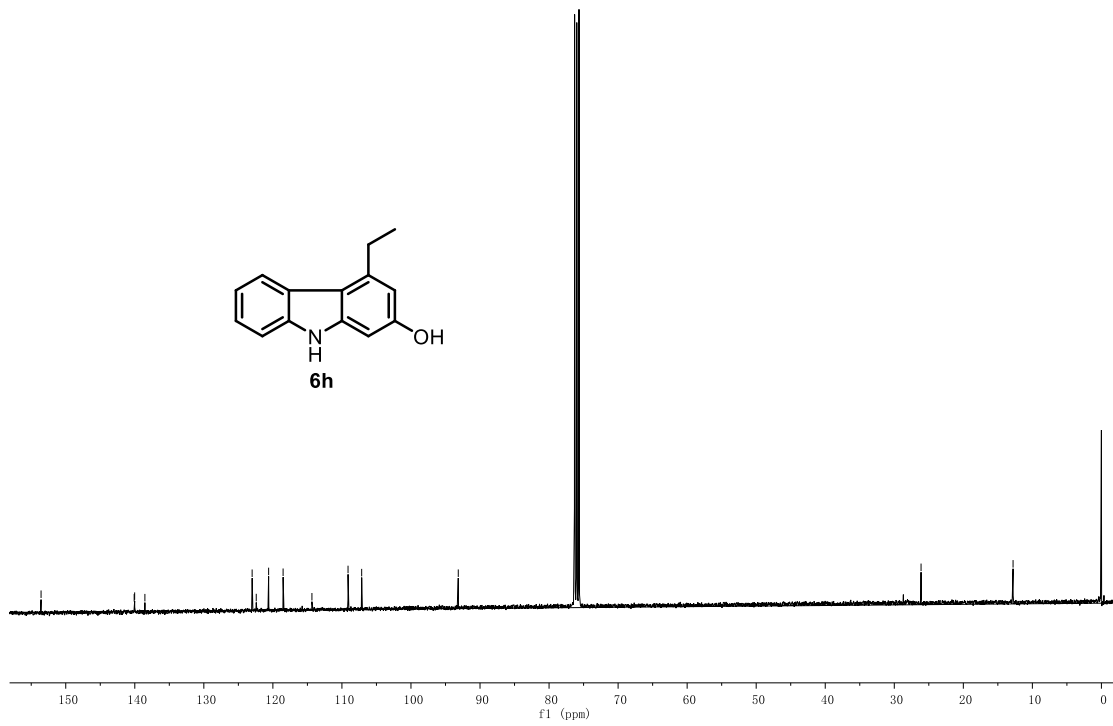

D-02-84-R  
 8.11, 8.07, 7.97, 7.36, 7.35, 7.34, 7.32, 7.24, 7.22, 7.21, 7.20, 6.71, 6.56, 6.55

4.81

3.15, 3.14, 3.12

1.85, 1.83, 1.82, 1.81, 1.79, 1.77, 1.56, 1.55, 1.50, 1.49, 1.02, 0.99

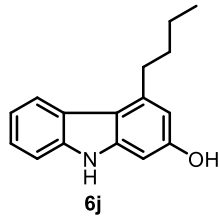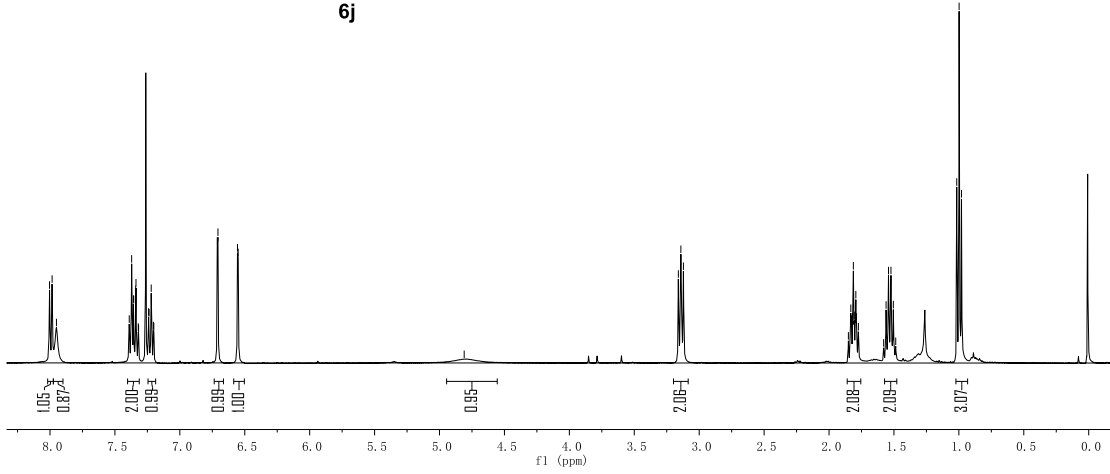

D-02-84-R

154.39

141.21, 139.89, 139.81, 138.49

124.06, 121.59, 119.57

10.15, 108.28

94.21

34.01

31.68

22.84

14.07

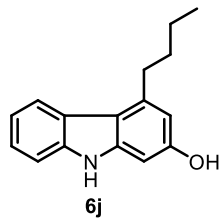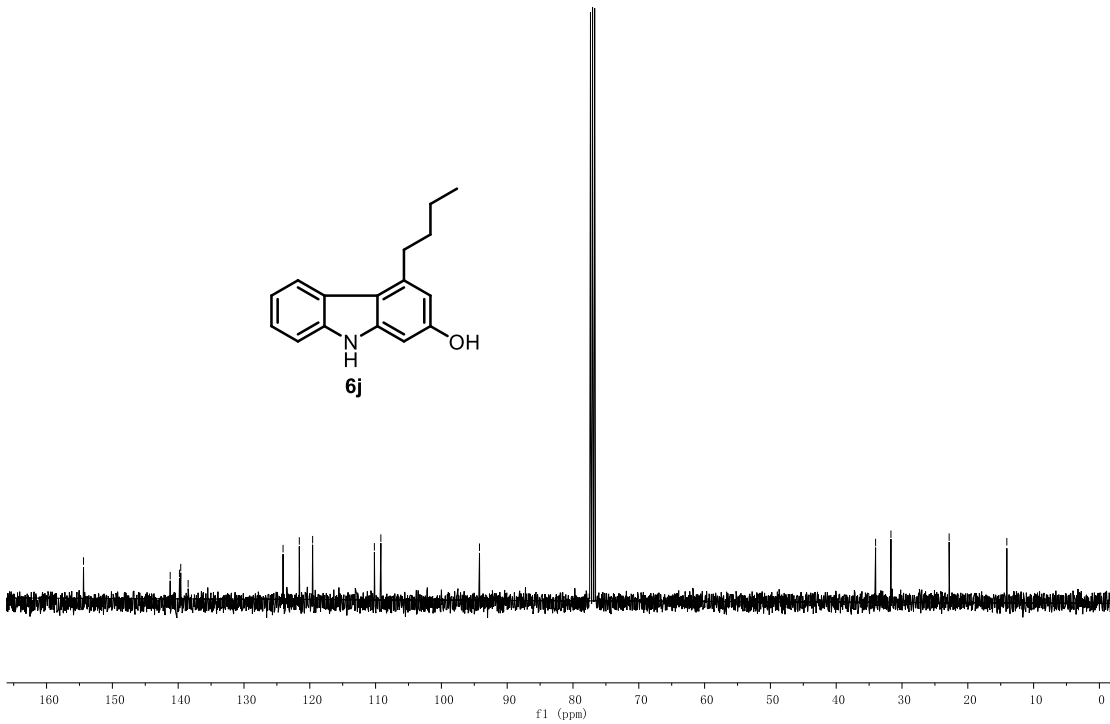

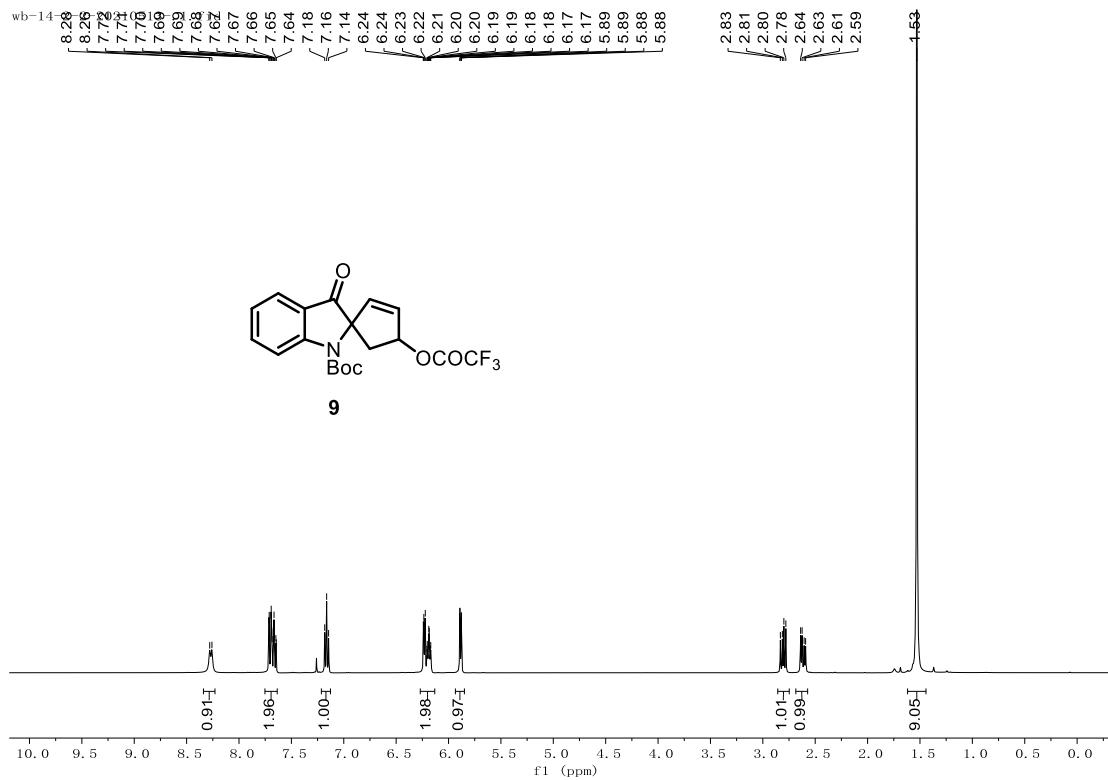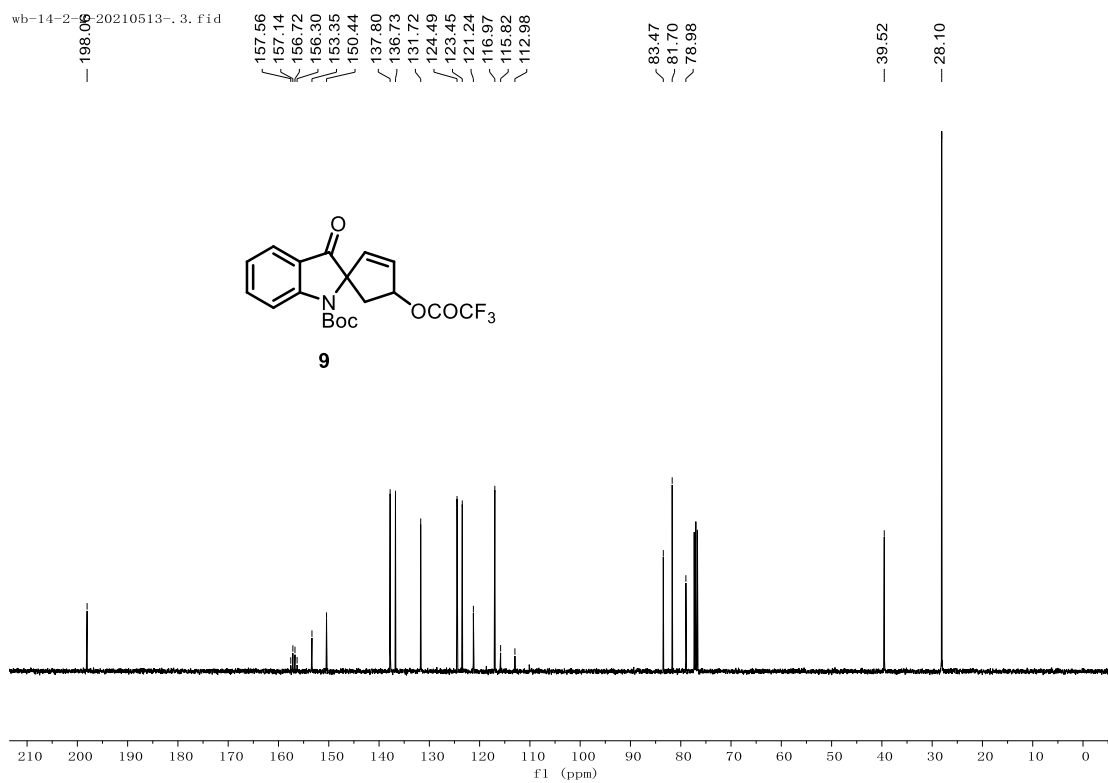

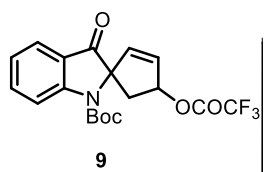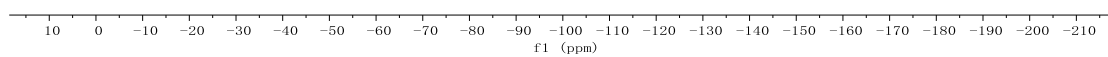



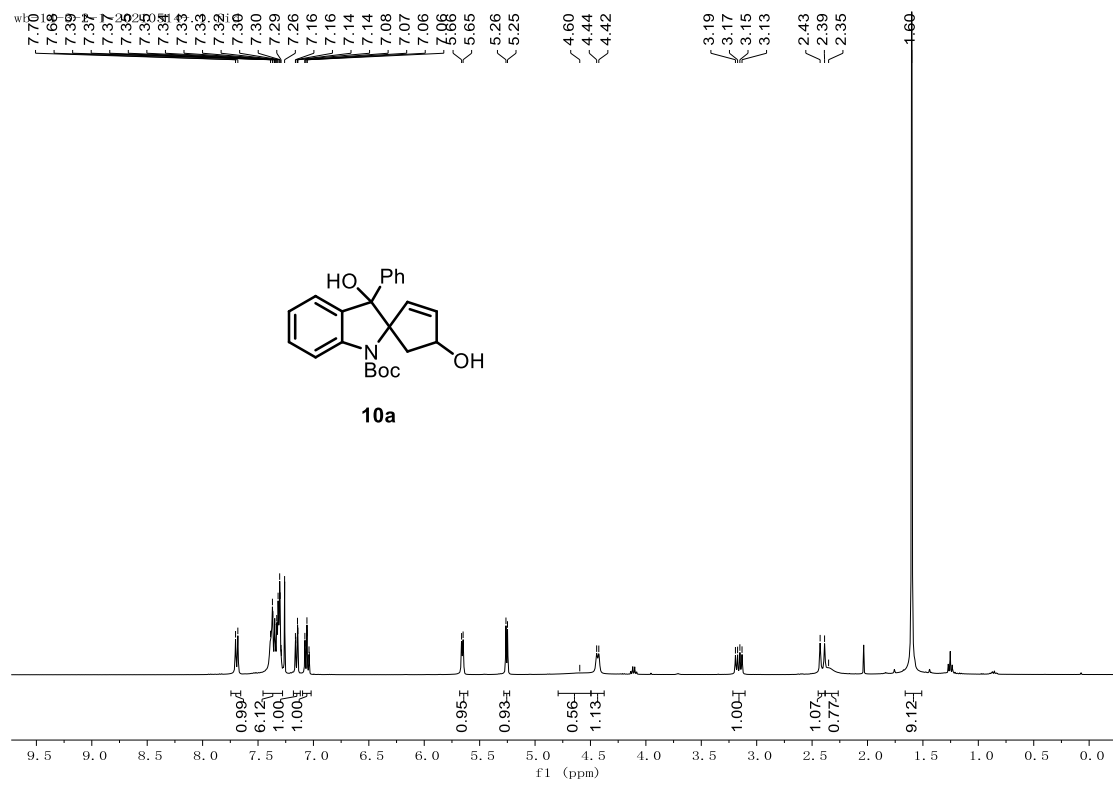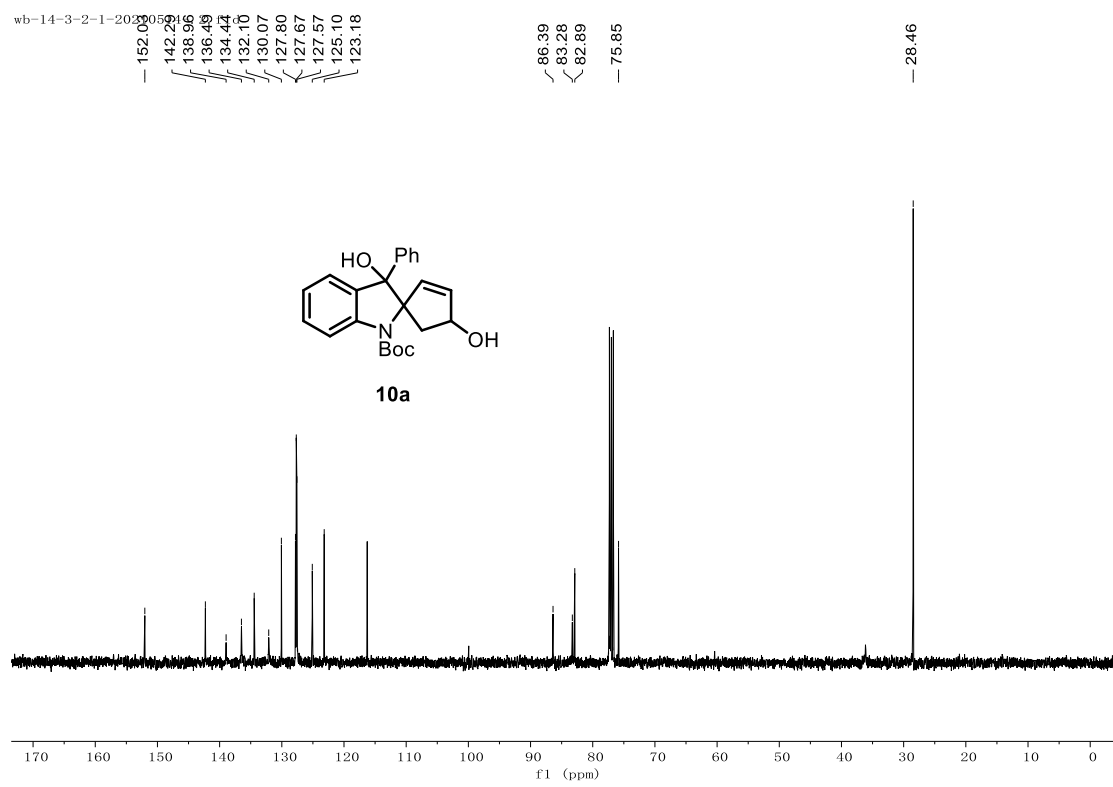

Supplement: d1qo01053k1.pdf [file d1qo01053k1.pdf]
